# Supplementary material for: Cardiovascular manifestations of renovascular hypertension in diabetic mice
Source: PeerJ. 2016 Feb 22;4:e1736. doi: 10.7717/peerj.1736 (PMC4768709; doi:10.7717/peerj.1736)
Supplement: Data S1 [file peerj-04-1736-s002.xlsx]

## Sheet: Main Data sheet
slide #	Score	sham/ras	day	aorta notes	Heart Fibrosis quantitative grade	Heart Fibrosis qaulitative grade	Heart Fibrosis qaulitative grade	mean media width at 10x	Macrophage count	Surg Date	Genotype	DOB	Surg type	Age Surg	Surg Wt	Treatment	DOD/SAC	Time/wks	Age/DOD	Wt/SAC	RK Wt	LK Wt	Heart Wt	R	R	C	C	Plasma Angiotensin I	Notes	Surgeon
						0=1% 1=5% 2=10% 3=25% 4=40%
DBC RAS
dbc-82	0	ras cuff	29	normal	0.096	2	0.1	67.5	0	2012-01-10	dbc (BLKS)	2011-11-23	RAS - Cuff	6.9	20.3	Vehicle control/Hydralazine	2012-02-08	4.1	11	21.5	160	280	180							Bruce Knudsen
dbc-83	0	ras cuff	29	normal	0.1566	2	0.1	50.61	1	2012-01-10	dbc (BLKS)	2011-11-23	RAS - Cuff	6.9	20.3	Vehicle control/Hydralazine	2012-02-08	4.1	11	21.8	80	250	140							Bruce Knudsen
dbc-45	0	ras cuff	42	normal	0.0288	2	0.1	72.91		2011-08-23	dbc (BLKS)	2011-07-12	RAS - Cuff	6	19.3	No intervention	2011-10-04	6	12	21.5	40	200	120	6.2	3.8	10.7	6.9			Bruce Knudsen
dbc44	0	ras cuff	42	normal	0.0298	0	0.01	67.22		2011-08-23	dbc (BLKS)	2011-07-12	RAS - Cuff	6	19.2	No intervention	2011-10-04	6	12	20	30	160	130	5.6	3.6	10.4	6.7			Bruce Knudsen
dbc 43	1	ras cuff	42	isolated SM dropout	0.0231	1	0.05	90.33	0	2011-08-23	dbc (BLKS)	2011-07-12	RAS - Cuff	6	21	No intervention	2011-10-04	6	12	24.2	90	180	140	8.2	4.7	10.7	6.6			Bruce Knudsen
dbc 42	1	ras cuff	42	isolated SM dropout	0.0133	1	0.05	64.71	0	2011-08-23	dbc (BLKS)	2011-07-12	RAS - Cuff	6	22.6	No intervention	2011-10-04	6	12	24.4	30	250	140	5.4	3.7	11.8	7.9			Bruce Knudsen
dbc 41	0	ras cuff	42	normal	0.0562	2	0.1	58.85		2011-08-23	dbc (BLKS)	2011-07-12	RAS - Cuff	6	22.4	No intervention	2011-10-04	6	12	24.4	130	160	160	9.4	5.3	10.2	6.1			Bruce Knudsen
dbc 160	0	ras cuff	3	normal (Imflammation around the artery)	0.024	0	0.01	48.05		2012-04-23	dbc (BLKS)	2012-02-28	RAS - Cuff	7.9	21.5	No intervention	2012-04-26	0.4	8.3	19.8	170	200	150					15.91		Bruce Knudsen
dbc 159	0	ras cuff	3	normal	0.0283	0	0.01	62.49		2012-04-23	dbc (BLKS)	2012-02-28	RAS - Cuff	7.9	22.6	No intervention	2012-04-26	0.4	8.3	21.3	190	220	150					12.802		Bruce Knudsen
dbc 158	0	ras cuff	3	normal (Imflammation around the artery)	0.1363	3	0.25	43.37		2012-04-23	dbc (BLKS)	2012-02-28	RAS - Cuff	7.9	23.7	No intervention	2012-04-26	0.4	8.3	20.8	140	220	180					6.142		Bruce Knudsen
dbc 157	0	ras cuff	3	normal	0.0221	0	0.01	43.51		2012-04-23	dbc (BLKS)	2012-02-28	RAS - Cuff	7.9	19.1	No intervention	2012-04-26	0.4	8.3	18.3	160	170	130					4.366		Bruce Knudsen
dbc 156	0	ras cuff	3	normal	0.0152	0	0.01	42.7		2012-04-23	dbc (BLKS)	2012-02-28	RAS - Cuff	7.9	22	No intervention	2012-04-26	0.4	8.3	21.3	170	190	130					11.322		Bruce Knudsen
dbc 155	0	ras cuff	6	normal	0.0124	0	0.01	75.3		2012-04-13	dbc (BLKS)	2012-02-21	RAS - Cuff	7.4	18.2	No intervention	2012-04-19	0.9	8.3	11.5	110	130	80					8.806		Bruce Knudsen
dbc 154	1	ras cuff	7	isolated SM drop out	0.0688	1	0.05	90.46	0	2012-04-13	dbc (BLKS)	2012-02-21	RAS - Cuff	7.4	23.4	No intervention	2012-04-20	1	8.4	21.2	90	220	150						13.098	Bruce Knudsen
dbc 153	1	ras cuff	7	mild SM drop out	0.0434	2	0.1	86.88	1	2012-04-13	dbc (BLKS)	2012-02-21	RAS - Cuff	7.4	23.4	No intervention	2012-04-20	1	8.4	18.5	130	180	120						18.648	Bruce Knudsen
dbc 152	1	ras cuff	7	mild SM drop out	0.0777	3	0.25	75.88	0	2012-04-13	dbc (BLKS)	2012-02-21	RAS - Cuff	7.4	22.6	No intervention	2012-04-20	1	8.4	20.6	80	170	130						11.84	Bruce Knudsen
dbc 150	0	ras cuff	8	normal	0.0297	0	0.01	77.21		2012-04-12	dbc (BLKS)	2012-02-21	RAS - Cuff	7.3	20.5	No intervention	2012-04-20	1.1	8.4	20.6	90	210	150					4.81		Bruce Knudsen
dbc 147	3	ras cuff	8	BAD AS IT GETS	0.0739	1	0.05	101.73	2	2012-04-12	dbc (BLKS)	2012-02-21	RAS - Cuff	7.3	20.7	No intervention	2012-04-20	1.1	8.4	19	90	180	130						19.832	Bruce Knudsen
dbc 146	0	ras cuff	7	normal	0.1588	2	0.1	81.53	3	2012-04-12	dbc (BLKS)	2012-02-21	RAS - Cuff	7.3	20.8	No intervention	2012-04-19	1	8.3	17.6	110	160	130					12.21	15.8545	Bruce Knudsen
dbc 140	0	ras cuff	3	normal	0.0216	0	0.01	41.62		2012-04-06	dbc (BLKS)	2012-02-21	RAS - Cuff	6.4	18.8	No intervention	2012-04-09	0.4	6.9	17.4	150	150	150	10.2	5.5	10.5	6.6	20.424		Bruce Knudsen
dbc 139	0	ras cuff	3	normal	0.0174	0	0.01	58.31		2012-04-06	dbc (BLKS)	2012-02-21	RAS - Cuff	6.4	20.5	No intervention	2012-04-09	0.4	6.9	18	160	180	140	10.1	5.8	10.8	6.8	18.5		Bruce Knudsen
dbc 138	0	ras cuff	3	normal	0.0256	0	0.01	54.98		2012-04-06	dbc (BLKS)	2012-02-21	RAS - Cuff	6.4	18.3	No intervention	2012-04-09	0.4	6.9	16.3	130	150	120	9.7	5.4	10.2	6.3	25.16		Bruce Knudsen
dbc 137	0	ras cuff	3	normal	0.0223	0	0.01	51.83		2012-04-06	dbc (BLKS)	2012-02-21	RAS - Cuff	6.4	19.6	No intervention	2012-04-09	0.4	6.9	19.6	190	190	130	10.9	6.1	11	6.9	29.896		Bruce Knudsen
dbc 136	0	ras cuff	3	normal	0.0187	0	0.01	55.49		2012-04-06	dbc (BLKS)	2012-02-21	RAS - Cuff	6.4	20.9	No intervention	2012-04-09	0.4	6.9	19.2	120	260	130	9.4	5.4	12.5	7.2	14.578		Bruce Knudsen
dbc 124	0	ras cuff	119	normal	0.0427	0	0.01	59.98		2012-01-09	dbc (BLKS)	2011-11-23	RAS - Cuff	6.7	18.8	No intervention	2012-05-07	17	23.7	25.1	50	300	160							Bruce Knudsen
dbc 123	0	ras cuff	119	normal	0.0218	0	0.01	50.92		2012-01-09	dbc (BLKS)	2011-11-23	RAS - Cuff	6.7	18.3	No intervention	2012-05-07	17	23.7	26	70	350	160							Bruce Knudsen
dbc 122	0	ras cuff	119	normal	0.0581	1	0.05	75.95		2012-01-09	dbc (BLKS)	2011-11-23	RAS - Cuff	6.7	20.3	No intervention	2012-05-07	17	23.7	26	30	320	160							Bruce Knudsen
dbc 46	0	ras cuff	42	normal	0.0039	1	0.05	62.67		2011-08-23	dbc (BLKS)	2011-07-12	RAS - Cuff	6	18	No intervention	2011-10-04	6	12	23.2	70	210	140	7.4	4.3	10.7	6.7			Bruce Knudsen
dbc 47	1	ras cuff	42	isolated SM dropout	0.0237	1	0.05	70.37	4	2011-08-23	dbc (BLKS)	2011-07-12	RAS - Cuff	6	19.6	No intervention	2011-10-04	6	12	21.6	140	170	150	9.8	5.2	10.7	6.8			Bruce Knudsen
dbc 48	0	ras cuff	42	normal	0.029	1	0.05	60.68		2011-08-23	dbc (BLKS)	2011-07-12	RAS - Cuff	6	17.3	No intervention	2011-10-04	6	12	22.3	60	190	130	7.2	4.1	10.7	6.8			Bruce Knudsen
dbc 49	1	ras cuff	42	isolated SM dropout	0.008	1	0.05	61.07	1	2011-08-23	dbc (BLKS)	2011-07-12	RAS - Cuff	6	17.9	No intervention	2011-10-04	6	12	21	40	220	140	6.7	3.8	11.4	7.1			Bruce Knudsen
dbc 50	2	ras cuff	42	moderate disruption with old heamorhage	0.0223	0	0.01	89.55	0	2011-08-23	dbc (BLKS)	2011-07-12	RAS - Cuff	6	17.7	No intervention	2011-10-04	6	12	22.9	70	220	130	7.8	4.3	10.9	6.8			Bruce Knudsen
dbc 151	3	ras cuff	7	heamorhage, inflammation, SM drop out	0.0231	0	0.01	80.96	4	2012-04-13	dbc (BLKS)	2012-02-21	RAS - Cuff	7.4	20.9	No intervention	2012-04-20	1	8.4	18.6	100	170	120							Bruce Knudsen
dbc 121	0	ras cuff	119	normal	0.0491	1	0.05	83.22	6	2012-01-09	dbc (BLKS)	2011-11-23	RAS - Cuff	6.7	20.5	No intervention	2012-05-07	17	23.7	25.6	40	320	130							Bruce Knudsen
dbc 119	0	ras cuff	116	normal	0.0639	1	0.05	66.01	0	2012-01-09	dbc (BLKS)	2011-11-23	RAS - Cuff	6.7	19	No intervention	2012-05-04	16.6	23.3	26.5	20	350	150							Bruce Knudsen
dbc 118	0	ras cuff	116	normal	0.0179	1	0.05	73.35		2012-01-09	dbc (BLKS)	2011-11-23	RAS - Cuff	6.7	19.7	No intervention	2012-05-04	16.6	23.3	25.4	100	280	170							Bruce Knudsen
dbc 117	0	ras cuff	116	normal	0.022	0	0.01	61.65		2012-01-09	dbc (BLKS)	2011-11-23	RAS - Cuff	6.7	20	No intervention	2012-05-04	16.6	23.3	26.3	20	330	160							Bruce Knudsen
AVERAGE	0.405405				0.0428514	0.810811	0.0505405
DB RAS
db 83	1	ras cuff	29	mild SM drop out	0.1219	2	0.1	66.07		2012-01-10	dbdb (BLKS)	2011-11-23	RAS - Cuff	6.9	31.4	Vehicle control/Hydralazine	2012-02-08	4.1	11	28.1	40	220	190							Bruce Knudsen
db 156	3	ras cuff	14	extensive inflammation, complete destruction of wall,thrombosis	0.0086	0	0.01		0	2012-05-09	dbdb (BLKS)	2012-03-20	RAS - Cuff	7.1	34.6	No intervention	2012-05-21	2	9.1	36.5	140	180	130							Bruce Knudsen
db 112	1	ras cuff	116	mild SM drop out	0.0222	0	0.01	108.46		2012-01-06	dbdb (BLKS)	2011-11-23	RAS - Cuff	6.3	26.7	No intervention	2012-05-01	16.6	22.9	27.5	40	380	230							Bruce Knudsen
db 105	1	ras cuff	5	mild SM drop out (DIED)	0.1185	1	0.05	83.84		2012-01-13	dbdb (BLKS)	2011-11-20	RAS - Cuff	7.7	40.6	No intervention	2012-01-18	0.7	8.4		120	180	160							Bruce Knudsen
db 101	0	ras cuff	42	normal	0.0989	2	0.1	55.38		2012-01-13	dbdb (BLKS)	2011-11-20	RAS - Cuff	7.7	38.1	No intervention	2012-02-24	6	13.7	37.8	100	380	210	8.6	5.5	13.6	8.6			Bruce Knudsen
db 81	1	ras cuff	29	mild SM drop out	0.1612	2	0.1	54.62		2012-01-10	dbdb (BLKS)	2011-11-23	RAS - Cuff	6.9	34.2	Vehicle control/Hydralazine	2012-02-08	4.1	11	26.6	50	250	150							Bruce Knudsen
db 69	0	ras cuff	30	normal	0.0296	1	0.05	62.92		2011-10-19	dbdb (BLKS)	2011-09-06	RAS - Cuff	6.1	24	Vehicle control/Losartan	2011-11-18	4.3	10.4	32.1	40	220	130	6.2	4.1	11	7.2			Bruce Knudsen
db 68	1	ras cuff	30	mild SM drop out	0.0343	1	0.05	56.11		2011-10-19	dbdb (BLKS)	2011-09-06	RAS - Cuff	6.1	30.9	Vehicle control/Losartan	2011-11-18	4.3	10.4	32.2	90	190	140	8.3	4.9	11	6.7			Bruce Knudsen
db 67	1	ras cuff	30	mild SM drop out	0.097	2	0.1	74.41		2011-10-19	dbdb (BLKS)	2011-09-06	RAS - Cuff	6.1	32.9	Vehicle control/Losartan	2011-11-18	4.3	10.4	37.4	50	210	160	6.9	4.6	11.2	7.2			Bruce Knudsen
db 66	0	ras cuff	30	normal	0.00974	0	0.01	58.21		2011-10-19	dbdb (BLKS)	2011-09-06	RAS - Cuff	6.1	34.9	Vehicle control/Losartan	2011-11-18	4.3	10.4	35.3	80	270	150	6.5	4.3	11.2	7.3			Bruce Knudsen
db 50	1	ras cuff	42	mild SM drop out	0.0326	0	0.01	68.06		2011-08-22	dbdb (BLKS)	2011-07-12	RAS - Cuff	5.9	32.2	No intervention	2011-10-03	6	11.9	47	90	250	180	7.7	5.2	11	8.1			Bruce Knudsen
db 48	2	ras cuff	42	moderate SM drop out	0.0447	1	0.05	61.09		2011-08-22	dbdb (BLKS)	2011-07-12	RAS - Cuff	5.9	33.2	No intervention	2011-10-03	6	11.9	46.3	60	250	210	6.7	5	11.2	7.7			Bruce Knudsen
db 47	0	ras cuff	42	normal	0.0106	0	0.01	91.81		2011-08-22	dbdb (BLKS)	2011-07-12	RAS - Cuff	5.9	28.9	No intervention	2011-10-03	6	11.9	42.6	140	240	150	8.4	5.7	11.6	7.4			Bruce Knudsen
db 46	1	ras cuff	42	mild	0.0358	1	0.05	109.48		2011-08-22	dbdb (BLKS)	2011-07-12	RAS - Cuff	5.9	30.5	No intervention	2011-10-03	6	11.9	45.2	70	280	160	7.3	5.1	12.1	7.4			Bruce Knudsen
db 45	0	ras cuff	42	normal	0.0332	0	0.01	66.43		2011-08-22	dbdb (BLKS)	2011-07-12	RAS - Cuff	5.9	34.2	No intervention	2011-10-03	6	11.9	37.5	30	230	140	5.4	3.7	11.7	6.8			Bruce Knudsen
db 44	2	ras cuff	42	Moderate SM drop out	0.0824	2	0.1	85.75	0	2011-08-22	dbdb (BLKS)	2011-07-12	RAS - Cuff	5.9	24.7	No intervention	2011-10-03	6	11.9	47.6	50	290	190	6.9	4.6	11.8	7.8			Bruce Knudsen
db 43	0	ras cuff	42	normal	0.0207	0	0.01	56.69		2011-08-22	dbdb (BLKS)	2011-07-12	RAS - Cuff	5.9	33.7	No intervention	2011-10-03	6	11.9	37.4	30	310	120	5.1	4	12.3	8.4			Bruce Knudsen
db 42	0	ras cuff	42	normal	0.1099	3	0.25	61.79		2011-08-22	dbdb (BLKS)	2011-07-12	RAS - Cuff	5.9	29.4	No intervention	2011-10-03	6	11.9	44.2	70	260	150	7.6	5.5	11.6	7.2			Bruce Knudsen
db 41	2	ras cuff	42	moderate isolated drop out	0.0116	0	0.01	86.9	0	2011-08-22	dbdb (BLKS)	2011-07-12	RAS - Cuff	5.9	33.9	No intervention	2011-10-03	6	11.9	45	50	300	160	6.3	4.5	12.4	8			Bruce Knudsen
db 160	0	ras cuff	14	normal	0.0174	0	0.01	39.51		2012-05-09	dbdb (BLKS)	2012-03-20	RAS - Cuff	7.1	32.4	No intervention	2012-05-22	2	9.1	36.3	80	170	140							Bruce Knudsen
db 159	0	ras cuff	14	normal	0.0196	0	0.01	58.41		2012-05-09	dbdb (BLKS)	2012-03-20	RAS - Cuff	7.1	33.7	No intervention	2012-05-22	2	9.1	35.8	150	230	150							Bruce Knudsen
db 158	3	ras cuff	14	heamorhage into walls	0.1526	2	0.1	109.18	0	2012-05-09	dbdb (BLKS)	2012-03-20	RAS - Cuff	7.1	35.7	No intervention	2012-05-22	2	9.1	32.9	100	200	150							Bruce Knudsen
db 157	1	ras cuff	14	mild SM drop out	0.0415	1	0.05	88.35		2012-05-09	dbdb (BLKS)	2012-03-20	RAS - Cuff	7.1	29.8	No intervention	2012-05-21	2	9.1	26.6	150	190	130							Bruce Knudsen
db 155	3	ras cuff	14	aortic rupture, myocyte necrosis, fibrin deposition, RBC in wall,	0.0693	3	0.25		0	2012-05-09	dbdb (BLKS)	2012-03-20	RAS - Cuff	7.1	37	No intervention	2012-05-21	2	9.1	37	110	190	140							Bruce Knudsen
db 154	0	ras cuff	14	normal	0.0144	0	0.01	63.29		2012-05-09	dbdb (BLKS)	2012-03-20	RAS - Cuff	7.1	37.7	No intervention	2012-05-21	2	9.1	38.6	170	270	120							Bruce Knudsen
db 153	3	ras cuff	14	inflammation, myocyte necrosis, haemorhage into wall	0.0893	2	0.1	38.98	0	2012-05-09	dbdb (BLKS)	2012-03-20	RAS - Cuff	7.1	38.2	No intervention	2012-05-21	2	9.1	30.2	120	190	150							Bruce Knudsen
db 152	2	ras cuff	14	SM drop out (DIED)	0.0364	1	0.05	60.37	0	2012-05-09	dbdb (BLKS)	2012-03-20	RAS - Cuff	7.1	35.1	No intervention	2012-05-21	N/A	N/A	N/A	N/A	N/A	N/A						Died pre harvest no organs harvested	Bruce Knudsen
db 151	3	ras cuff	14	myocyte necrosis, aortic rupture,heamorhage into wall	0.1109	3	0.25	104.75	0	2012-05-09	dbdb (BLKS)	2012-03-20	RAS - Cuff	7.1	36.1	No intervention	2012-05-21	2	9.1	30.8	90	190	150							Bruce Knudsen
db 145	2	ras cuff	7	inflammation inside of the artery walls	0.0115	0	0.01	47.82		2012-04-10	dbdb (BLKS)	2012-02-21	RAS - Cuff	7	31.2	No intervention	2012-04-17	1	8	33.7	170	240	150	9.5	5.8	11.3	7.7			Bruce Knudsen
db 144	3	ras cuff	7	Thrombus	0.0499	2	0.1	49.7		2012-04-10	dbdb (BLKS)	2012-02-21	RAS - Cuff	7	27.4	No intervention	2012-04-17	1	8	28.3	130	180	140	9.2	5.5	10.3	6.7			Bruce Knudsen
db 143	0	ras cuff	7	normal	0.0923	1	0.05	55.01		2012-04-10	dbdb (BLKS)	2012-02-21	RAS - Cuff	7	32	No intervention	2012-04-17	1	8	32	130	190	160	9.4	5.6	10.6	6.7			Bruce Knudsen
db 142	3	ras cuff	7	BAD AS IT GETS	0.0681	1	0.05	110.38	0	2012-04-10	dbdb (BLKS)	2012-02-21	RAS - Cuff	7	34	No intervention	2012-04-17	1	8	33.7	140	190	140	9.9	5.8	10.8	7.2			Bruce Knudsen
db 140	0	ras cuff	6	normal	0.0607	1	0.05	53.83		2012-04-10	dbdb (BLKS)	2012-02-21	RAS - Cuff	7	27.1	No intervention	2012-04-16	0.9	7.9	30.8	190	190	140	10.3	6.5	10.4	6.8			Bruce Knudsen
db 139	3	ras cuff	6	Necrophophy, heamorhage	0.0298	0	0.01	80.56	0	2012-04-10	dbdb (BLKS)	2012-02-21	RAS - Cuff	7	31.8	No intervention	2012-04-16	0.9	7.9	31.4	140	190	150	9.7	5.8	10.4	6.8			Bruce Knudsen
db 138	0	ras cuff	6	normal	0.0364	0	0.01	52.71		2012-04-10	dbdb (BLKS)	2012-02-21	RAS - Cuff	7	28.8	No intervention	2012-04-16	0.9	7.9	28.9	160	170	140	10.2	6.1	10.4	6.8			Bruce Knudsen
db 137	0	ras cuff	6	normal	0.0597	0	0.01	45.64		2012-04-10	dbdb (BLKS)	2012-02-21	RAS - Cuff	7	31.7	No intervention	2012-04-16	0.9	7.9	32.8	170	190	140	10.3	6.5	10.7	7.2			Bruce Knudsen
db 136	3	ras cuff	6	BAD AS IT GETS	0.0242	0	0.01	63.66		2012-04-10	dbdb (BLKS)	2012-02-21	RAS - Cuff	7	29.4	No intervention	2012-04-16	0.9	7.9	31.3	150	220	110	9.5	6.4	11.3	7.4			Bruce Knudsen
db 124	2	ras cuff	117	inflammation in adventitia, focal smooth muscle drop out moderate	0.0181	2	0.1	114.26	0	2012-01-06	dbdb (BLKS)	2011-11-23	RAS - Cuff	6.3	34.2	No intervention	2012-05-02	16.7	23	49.2	80	330	350							Bruce Knudsen
db 122	2	ras cuff	117	moderate SM drop out (DIED)	0.0223	1	0.05	77.69	1	2012-01-06	dbdb (BLKS)	2011-11-23	RAS - Cuff	6.3	30.8	No intervention	2012-05-02	16.7	23	30.4	70	400	210							Bruce Knudsen
db 114	0	ras cuff	116	normal	0.1284	2	0.1	69		2012-01-06	dbdb (BLKS)	2011-11-23	RAS - Cuff	6.3	29	No intervention	2012-05-01	16.6	22.9	45.6	190	350	170						Occlusion RRA-imaged	Bruce Knudsen
db 113	3	ras cuff	116	degeneration of wall old heamorhage, moderate	0.1356	2	0.1	124.72	0	2012-01-06	dbdb (BLKS)	2011-11-23	RAS - Cuff	6.3	30.3	No intervention	2012-05-01	16.6	22.9	39.5	180	480	220							Bruce Knudsen
db 49	1	ras cuff	42	mild SM drop out	0.0674	3	0.25	113.83		2011-08-22	dbdb (BLKS)	2011-07-12	RAS - Cuff	5.9	32.7	No intervention	2011-10-03	6	11.9	42.2	40	250	170	6.1	5.1	11.5	7.3			Bruce Knudsen
db 111	0	ras cuff	116	normal	0.1449	3	0.25	49.11		2012-01-06	dbdb (BLKS)	2011-11-23	RAS - Cuff	6.3	32.4	No intervention	2012-05-01	16.6	22.9	41.7	70	500	210							Bruce Knudsen
db 106	3	ras cuff	42	BAD AS IT GETS	0.0619	2	0.1	57.88	0	2012-01-13	dbdb (BLKS)	2011-11-20	RAS - Cuff	7.7	35.7	No intervention	2012-02-24	6	13.7	27.6	40	340	180	5.7	4.4	12.7	8.1			Bruce Knudsen
db 102	3	ras cuff	5	aortic rupture,with extensive necrosis (DIED)	0.0412	0	0.01	104.58		2012-01-13	dbdb (BLKS)	2011-11-20	RAS - Cuff	7.7	34.9	No intervention	2012-01-18	0.7	8.4		130	170	120						Died PO / pre-harvest Post-mortem harvest	Bruce Knudsen
db 57	1	ras cuff	104	mild SM drop out (DIED)	0.0347	0	0.01	55.27		2011-09-08	dbdb (BLKS)	2011-07-12	RAS - Cuff	8.3	35.1	No intervention	2011-12-21	14.9	23.1	47.8	200	290	200							Bruce Knudsen
db 56	2	ras cuff	90	Ruptured and inflamed (DIED)	0.1442	2	0.1	88.01		2011-09-08	dbdb (BLKS)	2011-07-12	RAS - Cuff	8.3	39.9	No intervention	2011-12-07	12.9	21.1	30.1	30	270	230							Bruce Knudsen
AVERAGE	1.34043				0.0609817	1.10638	0.0697872
DBC Sham
dbc 165	0	sham	3	normal	0.0044	0	0.01	44.16	1	2012-04-27	dbc (BLKS)	2012-03-06	Sham	7.4	21.4	No intervention	2012-04-30	0.4	7.9	20.3	220	190	130	11.7	6.8	10.8	6.7	21.016		Bruce Knudsen
dbc 164	0	sham	3	normal	0.0131	1	0.05	47.23	0	2012-04-27	dbc (BLKS)	2012-03-06	Sham	7.4	21.2	No intervention	2012-04-30	0.4	7.9	21	210	180	120	11.1	6.6	10.96	6.5	35.224		Bruce Knudsen
dbc 163	0	sham	3	normal	0.0081	0	0.01	37.28	0	2012-04-27	dbc (BLKS)	2012-03-06	Sham	7.4	21	No intervention	2012-04-30	0.4	7.9	20.9	200	190	140	11.1	6.2	11.2	6.7	20.054		Bruce Knudsen
dbc 162	0	sham	3	normal	0.0159	0	0.01	37.8	1	2012-04-27	dbc (BLKS)	2012-03-06	Sham	7.4	21.1	No intervention	2012-04-30	0.4	7.9	20.5	210	190	100	11.5	6.3	11	7.1	27.232		Bruce Knudsen
dbc 161	0	sham	3	normal	0.014	0	0.01	47.51	0	2012-04-27	dbc (BLKS)	2012-03-06	Sham	7.4	20.7	No intervention	2012-04-30	0.4	7.9	20.6	200	180	130	11.3	6.2	10.6	6.7	41.292		Bruce Knudsen
dbc 145	0	sham	8	normal	0.0085	0	0.01	55.26	1	2012-04-11	dbc (BLKS)	2012-02-21	Sham	7.1	21.7	No intervention	2012-04-19	1.1	8.3	21.1	220	180	140	11.5	6.1	11.6	6.2	11.988		Bruce Knudsen
dbc 144	0	sham	8	normal	0.013	0	0.01	65.22	1	2012-04-11	dbc (BLKS)	2012-02-21	Sham	7.1	19.8	No intervention	2012-04-19	1.1	8.3	20.4	220	210	120	11.4	6.3	11.1	6.6	12.358		Bruce Knudsen
dbc 143	0	sham	8	normal	0.0161	0	0.01	55.4	1	2012-04-11	dbc (BLKS)	2012-02-21	Sham	7.1	21.1	No intervention	2012-04-19	1.1	8.3	22	220	190	120	11.3	7.1	10.9	6.5	3.478		Bruce Knudsen
dbc 142	0	sham	8	normal	0.0164	0	0.01	47.03		2012-04-11	dbc (BLKS)	2012-02-21	Sham	7.1	21.5	No intervention	2012-04-19	1.1	8.3	22.7	250	210	120	11.7	6.4	11.4	7	5.328		Bruce Knudsen
dbc 141	0	sham	8	normal	0.0085	0	0.01	48.83		2012-04-11	dbc (BLKS)	2012-02-21	Sham	7.1	20.6	No intervention	2012-04-19	1.1	8.3	21.2	220	190	130	12	6.4	10.9	6.7	8.732		Bruce Knudsen
dbc 51	0	sham	42	normal	0.0099	1	0.05	44.41		2011-08-24	dbc (BLKS)	2011-07-12	Sham	6.1	19.3	No intervention	2011-10-05	6	12.1	25	200	210	150	10.8	6.3	11.3	6.6	18.6702		Bruce Knudsen
dbc 52	0	sham	42	normal	0.0053	1	0.05	53.78		2011-08-24	dbc (BLKS)	2011-07-12	Sham	6.1	19.9	No intervention	2011-10-05	6	12.1	24.7	180	190	120	10.5	6.2	10.2	6.8			Bruce Knudsen
dbc 53	0	sham	42	normal	0.0153	0	0.01			2011-08-24	dbc (BLKS)	2011-07-12	Sham	6.1	19.7	No intervention	2011-10-05	6	12.1	25.9	210	200	150	10.5	6.5	10.8	7			Bruce Knudsen
dbc 54	0	sham	42	normal	0.0079	0	0.01	94.98		2011-08-24	dbc (BLKS)	2011-07-12	Sham	6.1	19.1	No intervention	2011-10-05	6	12.1	24.2	200	170	120	10.8	5.9	10.4	6.6			Bruce Knudsen
dbc 55	0	sham	42	normal	0.0118	1	0.05	52.08		2011-08-24	dbc (BLKS)	2011-07-12	Sham	6.1	19.9	No intervention	2011-10-05	6	12.1	24.6	210	200	140	11.1	6.4	10.9	6.6			Bruce Knudsen
dbc 115	0	sham	117	normal	0.0139	0	0.01	66.01		2012-01-07	dbc (BLKS)	2011-11-23	Sham	6.4	17.7	No intervention	2012-05-04	16.9	23.3	26.3	260	240	160							Bruce Knudsen
dbc 113	0	sham	117	normal	0.0191	0	0.01	61.89		2012-01-07	dbc (BLKS)	2011-11-23	Sham	6.4	19	No intervention	2012-05-03	16.7	23.1	28	270	250	160							Bruce Knudsen
dbc 112	0	sham	117	normal	0.0184	0	0.01	48.54		2012-01-07	dbc (BLKS)	2011-11-23	Sham	6.4	20.1	No intervention	2012-05-03	16.7	23.1	26.4	230	220	140							Bruce Knudsen
dbc 111	0	sham	117	normal	0.0157	0	0.01	47.09		2012-01-07	dbc (BLKS)	2011-11-23	Sham	6.4	18.5	No intervention	2012-05-03	16.7	23.1	26.9	250	240	150							Bruce Knudsen
AVERAGE	0				0.0123842	0.210526	0.0184211
DB Sham
db 55	0	sham	42	normal	0.0099	0	0.01	108.79	0	2011-08-24	dbdb (BLKS)	2011-07-12	Sham	6.1	31.8	No intervention	2011-10-05	6	12.1	31.4	190	240	110	9.9	6.3	12	6.7			Bruce Knudsen
db 54	0	sham	42	normal	0.0339	1	0.05	51.74	0	2011-08-24	dbdb (BLKS)	2011-07-12	Sham	6.1	33	No intervention	2011-10-05	6	12.1	36.9	240	190	120	11.3	6.3	10.9	6.6			Bruce Knudsen
db 53	0	sham	42	normal	0.0214	1	0.05	66.41	0	2011-08-24	dbdb (BLKS)	2011-07-12	Sham	6.1	32.3	No intervention	2011-10-05	6	12.1	39.9	220	220	120	10.8	6.8	10.6	7.1			Bruce Knudsen
db 52	0	sham	42	normal	0.0099	1	0.05	74.42	0	2011-08-24	dbdb (BLKS)	2011-07-12	Sham	6.1	34.1	No intervention	2011-10-05	6	12.1	43.5	230	210	130	11	6.7	10.6	6.8			Bruce Knudsen
db 51	0	sham	42	normal	0.0097	0	0.01	73.01	0	2011-08-24	dbdb (BLKS)	2011-07-12	Sham	6.1	30.1	No intervention	2011-10-05	6	12.1	34.7	190	190	110	10.1	6.6	10.3	7.1			Bruce Knudsen
db 165	0	sham	42	normal	0.0294	0	0.01	67.55	0	2012-05-10	dbdb (BLKS)	2012-03-20	Sham	7.3	39.2	No intervention	2012-05-23	2	9.3	41.5	120	190	180							Bruce Knudsen
db 164	0	sham	13	normal	0.0265	0	0.01	27.29	0	2012-05-10	dbdb (BLKS)	2012-03-20	Sham	7.1	38.3	No intervention	2012-05-23	2	9.3	33.1	140	240	150							Bruce Knudsen
db 161	0	sham	13	normal	0.0237	1	0.05	74.6	0	2012-05-09	dbdb (BLKS)	2012-03-20	Sham	7.3	33.3	No intervention	2012-05-22	2	9.3	38.9	210	210	160							Bruce Knudsen
db 150	0	sham	7	normal	0.0231	0	0.01	27.42		2012-04-11	dbdb (BLKS)	2012-02-21	Sham	7.1	28.9	No intervention	2012-04-18	1	8.1	32.3	210	150	120	11.5	6.5	9.7	6.3			Bruce Knudsen
db 149	0	sham	7	normal	0.012	0	0.01	63.73		2012-04-11	dbdb (BLKS)	2012-02-21	Sham	7.1	28	No intervention	2012-04-18	1	8.1	28	190	160	120	10.4	6.4	10.1	6.5			Bruce Knudsen
db 148	0	sham	7	normal	0.0064	0	0.01	58.33		2012-04-11	dbdb (BLKS)	2012-02-21	Sham	7.1	29.4	No intervention	2012-04-18	1	8.1	32.4	220	170	120	11.2	6.5	10.1	7.2			Bruce Knudsen
db 147	0	sham	7	normal	0.0085	0	0.01	65.39		2012-04-11	dbdb (BLKS)	2012-02-21	Sham	7.1	30.6	No intervention	2012-04-18	1	8.1	33.3	150	230	120	9.6	5.7	11.5	7.4			Bruce Knudsen
db 146	0	sham	7	normal	0.008	0	0.01	50.84		2012-04-11	dbdb (BLKS)	2012-02-21	Sham	7.1	32.3	No intervention	2012-04-18	1	8.1	35.1	230	220	130	11.6	7	11.2	7.4			Bruce Knudsen
db 120	0	sham	117	normal	0.0132	0	0.01	47.7		2012-01-07	dbdb (BLKS)	2011-11-23	Sham	6.4	26.7	No intervention	2012-05-03	16.7	23.1	30.5	300	250	140							Bruce Knudsen
db 119	0	sham	117	normal	0.0275	0	0.01	50.76		2012-01-07	dbdb (BLKS)	2011-11-23	Sham	6.4	33	No intervention	2012-05-03	16.7	23.1	26	370	310	130							Bruce Knudsen
db 117	0	sham	116	normal	0.022	0	0.01	61.89		2012-01-07	dbdb (BLKS)	2011-11-23	Sham	6.4	31.6	No intervention	2012-05-02	16.6	23	27	410	330	170							Bruce Knudsen
db 116	0	sham	116	normal	0.0159	0	0.01	62.92		2012-01-07	dbdb (BLKS)	2011-11-23	Sham	6.4	32.4	No intervention	2012-05-02	16.6	23	24.4	350	320	150							Bruce Knudsen
db 115	0	sham	116	normal	0.008	0	0.01	52.37		2012-01-06	dbdb (BLKS)	2011-11-23	Sham	6.3	30.7	No intervention	2012-05-01	16.6	22.9	26.4	240	230	120						Changed to sham due to RAA atypical-imaged	Bruce Knudsen
db 109	0	sham	42	normal	0.0066	0	0.01	35.6		2012-01-13	dbdb (BLKS)	2011-11-20	Sham	7.7	31.2	No intervention	2012-02-24	6	13.7	36.3	230	240	120	11.1	6.9	11.4	7.5			Bruce Knudsen
db 108	0	sham	42	normal	0.0065	0	0.01	53.41		2012-01-13	dbdb (BLKS)	2011-11-20	Sham	7.7	31.9	No intervention	2012-02-24	6	13.7	29.8	240	230	130	10.9	6.9	10.6	6.9			Bruce Knudsen
db 107	0	sham	42	normal	0.004	0	0.01	35.49		2012-01-13	dbdb (BLKS)	2011-11-20	Sham	7.7	24.1	No intervention	2012-02-24	6	13.7	30	180	170	110	9.8	6.3	10	6.1			Bruce Knudsen
AVERAGE	0				0.0155286	0.190476	0.017619	1209.66
DBC Control
dbc165a	0	control	14	normal		3		46.46		2012-05-10	dbc (BLKS)	2012-03-20	Control	7.3	21.8	No intervention	2012-05-24	2	9.3	20.3	110	200	130							Bruce Knudsen
dbc 164a	0	control	14	normal		2		61.65		2012-05-10	dbc (BLKS)	2012-03-20	Control	7.3	23.4	No intervention	2012-05-24	2	9.3	19.6	70	230	160							Bruce Knudsen
dbc 163a	renal	control	14	RENAL???		1				2012-05-10	dbc (BLKS)	2012-03-20	Control	7.3	23.7	No intervention	2012-05-24	2	9.3	22.1	90	240	160							Bruce Knudsen
dbc 162a	renal	control	14	RENAL???		3				2012-05-10	dbc (BLKS)	2012-03-20	Control	7.3	24.1	No intervention	2012-05-24	2	9.3	22	70	230	150							Bruce Knudsen
dbc 161a	0	control	14	normal		2		61.19		2012-05-10	dbdb (BLKS)	2012-03-20	Control	7.3	24.4	No intervention	2012-05-24	2	9.3	22	60	220	190							Bruce Knudsen

## Sheet:  # Per timepoint
Number of Animals per time point
DAY 3				DAY 90
	RAS	SHAM			RAS	SHAM
DBC	10	5		DBC	0	0
DB	0	0		DB	1	0
DAY 5				DAY 104
	RAS	SHAM			RAS	SHAM
DBC	0	0		DBC	0	0
DB	2	0		DB	1	0
DAY 6				DAY 116
	RAS	SHAM			RAS	SHAM
DBC	1	0		DBC	3	0
DB	5	0		DB	4	3
DAY 7				DAY 117
	RAS	SHAM			RAS	SHAM
DBC	5	0		DBC	0	4
DB	4	5		DB	2	2
DAY 8				DAY 119
	RAS	SHAM			RAS	SHAM
DBC	2	5		DBC	5	0
DB	0	0		DB	0	0
DAY 13
	RAS	SHAM
DBC	0	0		AVERAGE
DB	0	3
				DAY 6.9
DAY 14					RAS	SHAM
	RAS	SHAM		DBC	8	5
DBC	0	0		DB	11	5
DB	10	0
				DAY 117
DAY 29					RAS	SHAM
	RAS	SHAM		DBC	8	4
DBC	3	0		DB	6	5
DB	3	0
DAY 30
	RAS	SHAM
DBC	0	0
DB	4	0
DAY 42
	RAS	SHAM
DBC	10	5
DB	12	9

## Sheet: data via time point
slide #	Score	sham/ras	day	aorta notes	Heart Fibrosis qaulitative grade	mean media width at 10x	Surg Date	Genotype	DOB	Surg type	Age Surg	Surg Wt	Treatment	DOD/SAC	Time/wks	Age/DOD	Wt/SAC	RK Wt	LK Wt	Heart Wt	R	R	C	C	Notes	Surgeon
					1=0% 1=5% 2=10% 3=25% 4=40%
DBC RAS
dbc 160	0	ras cuff	3	normal (Imflammation around the artery)	0	48.05	2012-04-23	dbc (BLKS)	2012-02-28	RAS - Cuff	7.9	21.5	No intervention	2012-04-26	0.4	8.3	19.8	170	200	150						Bruce Knudsen
dbc 159	0	ras cuff	3	normal	0	62.49	2012-04-23	dbc (BLKS)	2012-02-28	RAS - Cuff	7.9	22.6	No intervention	2012-04-26	0.4	8.3	21.3	190	220	150						Bruce Knudsen
dbc 158	0	ras cuff	3	normal (Imflammation around the artery)	3	43.37	2012-04-23	dbc (BLKS)	2012-02-28	RAS - Cuff	7.9	23.7	No intervention	2012-04-26	0.4	8.3	20.8	140	220	180						Bruce Knudsen
dbc 157	0	ras cuff	3	normal	0	43.51	2012-04-23	dbc (BLKS)	2012-02-28	RAS - Cuff	7.9	19.1	No intervention	2012-04-26	0.4	8.3	18.3	160	170	130						Bruce Knudsen
dbc 156	0	ras cuff	3	normal	0	42.7	2012-04-23	dbc (BLKS)	2012-02-28	RAS - Cuff	7.9	22	No intervention	2012-04-26	0.4	8.3	21.3	170	190	130						Bruce Knudsen
dbc 140	0	ras cuff	3	normal	0	41.62	2012-04-06	dbc (BLKS)	2012-02-21	RAS - Cuff	6.4	18.8	No intervention	2012-04-09	0.4	6.9	17.4	150	150	150	10.2	5.5	10.5	6.6		Bruce Knudsen
dbc 139	0	ras cuff	3	normal	0	58.31	2012-04-06	dbc (BLKS)	2012-02-21	RAS - Cuff	6.4	20.5	No intervention	2012-04-09	0.4	6.9	18	160	180	140	10.1	5.8	10.8	6.8		Bruce Knudsen
dbc 138	0	ras cuff	3	normal	0	54.98	2012-04-06	dbc (BLKS)	2012-02-21	RAS - Cuff	6.4	18.3	No intervention	2012-04-09	0.4	6.9	16.3	130	150	120	9.7	5.4	10.2	6.3		Bruce Knudsen
dbc 137	0	ras cuff	3	normal	0	51.83	2012-04-06	dbc (BLKS)	2012-02-21	RAS - Cuff	6.4	19.6	No intervention	2012-04-09	0.4	6.9	19.6	190	190	130	10.9	6.1	11	6.9		Bruce Knudsen
dbc 136	0	ras cuff	3	normal	0	55.49	2012-04-06	dbc (BLKS)	2012-02-21	RAS - Cuff	6.4	20.9	No intervention	2012-04-09	0.4	6.9	19.2	120	260	130	9.4	5.4	12.5	7.2		Bruce Knudsen
dbc 155	0	ras cuff	6	normal	0	75.3	2012-04-13	dbc (BLKS)	2012-02-21	RAS - Cuff	7.4	18.2	No intervention	2012-04-19	0.9	8.3	11.5	110	130	80						Bruce Knudsen
dbc 154	1	ras cuff	7	isolated SM drop out	1	90.46	2012-04-13	dbc (BLKS)	2012-02-21	RAS - Cuff	7.4	23.4	No intervention	2012-04-20	1	8.4	21.2	90	220	150						Bruce Knudsen
dbc 153	1	ras cuff	7	mild SM drop out	2	86.88	2012-04-13	dbc (BLKS)	2012-02-21	RAS - Cuff	7.4	23.4	No intervention	2012-04-20	1	8.4	18.5	130	180	120						Bruce Knudsen
dbc 152	1	ras cuff	7	mild SM drop out	3	75.88	2012-04-13	dbc (BLKS)	2012-02-21	RAS - Cuff	7.4	22.6	No intervention	2012-04-20	1	8.4	20.6	80	170	130						Bruce Knudsen
dbc 151	3	ras cuff	7	heamorhage, inflammation, SM drop out	0	80.96	2012-04-13	dbc (BLKS)	2012-02-21	RAS - Cuff	7.4	20.9	No intervention	2012-04-20	1	8.4	18.6	100	170	120						Bruce Knudsen
dbc 146	0	ras cuff	7	normal	2	81.53	2012-04-12	dbc (BLKS)	2012-02-21	RAS - Cuff	7.3	20.8	No intervention	2012-04-19	1	8.3	17.6	110	160	130						Bruce Knudsen
dbc 150	0	ras cuff	8	normal	0	77.21	2012-04-12	dbc (BLKS)	2012-02-21	RAS - Cuff	7.3	20.5	No intervention	2012-04-20	1.1	8.4	20.6	90	210	150						Bruce Knudsen
dbc 147	3	ras cuff	8	BAD AS IT GETS	1	101.73	2012-04-12	dbc (BLKS)	2012-02-21	RAS - Cuff	7.3	20.7	No intervention	2012-04-20	1.1	8.4	19	90	180	130						Bruce Knudsen
dbc-82	0	ras cuff	29	normal	2	67.5	2012-01-10	dbc (BLKS)	2011-11-23	RAS - Cuff	6.9	20.3	Vehicle control/Hydralazine	2012-02-08	4.1	11	21.5	160	280	180						Bruce Knudsen
dbc-85	0	ras cuff	29	normal	0	77.99	2012-01-10	dbc (BLKS)	2011-11-23	RAS - Cuff	6.9	19.5	Hydralazine	2012-02-08	4.1	11	21.5	120	220	140						Bruce Knudsen
dbc-83	0	ras cuff	29	normal	2	50.61	2012-01-10	dbc (BLKS)	2011-11-23	RAS - Cuff	6.9	20.3	Vehicle control/Hydralazine	2012-02-08	4.1	11	21.8	80	250	140						Bruce Knudsen
dbc 41	0	ras cuff	42	normal	2	58.85	2011-08-23	dbc (BLKS)	2011-07-12	RAS - Cuff	6	22.4	No intervention	2011-10-04	6	12	24.4	130	160	160	9.4	5.3	10.2	6.1		Bruce Knudsen
dbc 42	1	ras cuff	42	isolated SM dropout	1	64.71	2011-08-23	dbc (BLKS)	2011-07-12	RAS - Cuff	6	22.6	No intervention	2011-10-04	6	12	24.4	30	250	140	5.4	3.7	11.8	7.9		Bruce Knudsen
dbc 43	1	ras cuff	42	isolated SM dropout	1	90.33	2011-08-23	dbc (BLKS)	2011-07-12	RAS - Cuff	6	21	No intervention	2011-10-04	6	12	24.2	90	180	140	8.2	4.7	10.7	6.6		Bruce Knudsen
dbc44	0	ras cuff	42	normal	0	67.22	2011-08-23	dbc (BLKS)	2011-07-12	RAS - Cuff	6	19.2	No intervention	2011-10-04	6	12	20	30	160	130	5.6	3.6	10.4	6.7		Bruce Knudsen
dbc-45	0	ras cuff	42	normal	2	72.91	2011-08-23	dbc (BLKS)	2011-07-12	RAS - Cuff	6	19.3	No intervention	2011-10-04	6	12	21.5	40	200	120	6.2	3.8	10.7	6.9		Bruce Knudsen
dbc 46	0	ras cuff	42	normal	1	62.67	2011-08-23	dbc (BLKS)	2011-07-12	RAS - Cuff	6	18	No intervention	2011-10-04	6	12	23.2	70	210	140	7.4	4.3	10.7	6.7		Bruce Knudsen
dbc 47	1	ras cuff	42	isolated SM dropout	1	70.37	2011-08-23	dbc (BLKS)	2011-07-12	RAS - Cuff	6	19.6	No intervention	2011-10-04	6	12	21.6	140	170	150	9.8	5.2	10.7	6.8		Bruce Knudsen
dbc 48	0	ras cuff	42	normal	1	60.68	2011-08-23	dbc (BLKS)	2011-07-12	RAS - Cuff	6	17.3	No intervention	2011-10-04	6	12	22.3	60	190	130	7.2	4.1	10.7	6.8		Bruce Knudsen
dbc 49	1	ras cuff	42	isolated SM dropout	1	61.07	2011-08-23	dbc (BLKS)	2011-07-12	RAS - Cuff	6	17.9	No intervention	2011-10-04	6	12	21	40	220	140	6.7	3.8	11.4	7.1		Bruce Knudsen
dbc 50	2	ras cuff	42	moderate disruption with old heamorhage	0	89.55	2011-08-23	dbc (BLKS)	2011-07-12	RAS - Cuff	6	17.7	No intervention	2011-10-04	6	12	22.9	70	220	130	7.8	4.3	10.9	6.8		Bruce Knudsen
dbc 119	0	ras cuff	116	normal	1	66.01	2012-01-09	dbc (BLKS)	2011-11-23	RAS - Cuff	6.7	19	No intervention	2012-05-04	16.6	23.3	26.5	20	350	150						Bruce Knudsen
dbc 118	0	ras cuff	116	normal	1	73.35	2012-01-09	dbc (BLKS)	2011-11-23	RAS - Cuff	6.7	19.7	No intervention	2012-05-04	16.6	23.3	25.4	100	280	170						Bruce Knudsen
dbc 117	0	ras cuff	116	normal	0	61.65	2012-01-09	dbc (BLKS)	2011-11-23	RAS - Cuff	6.7	20	No intervention	2012-05-04	16.6	23.3	26.3	20	330	160						Bruce Knudsen
dbc 125	renal	ras cuff	119	RENAL MAYBE?????	1		2012-01-09	dbc (BLKS)	2011-11-23	RAS - Cuff	6.7	19.4	No intervention	2012-05-07	17	23.7	26.4	20	310	150						Bruce Knudsen
dbc 124	0	ras cuff	119	normal	0	59.98	2012-01-09	dbc (BLKS)	2011-11-23	RAS - Cuff	6.7	18.8	No intervention	2012-05-07	17	23.7	25.1	50	300	160						Bruce Knudsen
dbc 123	0	ras cuff	119	normal	0	50.92	2012-01-09	dbc (BLKS)	2011-11-23	RAS - Cuff	6.7	18.3	No intervention	2012-05-07	17	23.7	26	70	350	160						Bruce Knudsen
dbc 122	0	ras cuff	119	normal	1	75.95	2012-01-09	dbc (BLKS)	2011-11-23	RAS - Cuff	6.7	20.3	No intervention	2012-05-07	17	23.7	26	30	320	160						Bruce Knudsen
dbc 121	0	ras cuff	119	normal	1	83.22	2012-01-09	dbc (BLKS)	2011-11-23	RAS - Cuff	6.7	20.5	No intervention	2012-05-07	17	23.7	25.6	40	320	130						Bruce Knudsen
DB RAS
db 105	1	ras cuff	5	mild SM drop out	1	83.84	2012-01-13	dbdb (BLKS)	2011-11-20	RAS - Cuff	7.7	40.6	No intervention	2012-01-18	0.7	8.4		120	180	160						Bruce Knudsen
db 102	3	ras cuff	5	aortic rupture,with extensive necrosis	0	104.58	2012-01-13	dbdb (BLKS)	2011-11-20	RAS - Cuff	7.7	34.9	No intervention	2012-01-18	0.7	8.4		130	170	120					Died PO / pre-harvest Post-mortem harvest	Bruce Knudsen
db 140	0	ras cuff	6	normal	1	53.83	2012-04-10	dbdb (BLKS)	2012-02-21	RAS - Cuff	7	27.1	No intervention	2012-04-16	0.9	7.9	30.8	190	190	140	10.3	6.5	10.4	6.8		Bruce Knudsen
db 139	3	ras cuff	6	Necrophophy, heamorhage	0	80.56	2012-04-10	dbdb (BLKS)	2012-02-21	RAS - Cuff	7	31.8	No intervention	2012-04-16	0.9	7.9	31.4	140	190	150	9.7	5.8	10.4	6.8		Bruce Knudsen
db 138	0	ras cuff	6	normal	0	52.71	2012-04-10	dbdb (BLKS)	2012-02-21	RAS - Cuff	7	28.8	No intervention	2012-04-16	0.9	7.9	28.9	160	170	140	10.2	6.1	10.4	6.8		Bruce Knudsen
db 137	0	ras cuff	6	normal	0	45.64	2012-04-10	dbdb (BLKS)	2012-02-21	RAS - Cuff	7	31.7	No intervention	2012-04-16	0.9	7.9	32.8	170	190	140	10.3	6.5	10.7	7.2		Bruce Knudsen
db 136	3	ras cuff	6	BAD AS IT GETS	0	63.66	2012-04-10	dbdb (BLKS)	2012-02-21	RAS - Cuff	7	29.4	No intervention	2012-04-16	0.9	7.9	31.3	150	220	110	9.5	6.4	11.3	7.4		Bruce Knudsen
db 145	2	ras cuff	7	inflammation inside of the artery walls	0	47.82	2012-04-10	dbdb (BLKS)	2012-02-21	RAS - Cuff	7	31.2	No intervention	2012-04-17	1	8	33.7	170	240	150	9.5	5.8	11.3	7.7		Bruce Knudsen
db 144	3	ras cuff	7	Thrombus	2	49.7	2012-04-10	dbdb (BLKS)	2012-02-21	RAS - Cuff	7	27.4	No intervention	2012-04-17	1	8	28.3	130	180	140	9.2	5.5	10.3	6.7		Bruce Knudsen
db 143	0	ras cuff	7	normal	1	55.01	2012-04-10	dbdb (BLKS)	2012-02-21	RAS - Cuff	7	32	No intervention	2012-04-17	1	8	32	130	190	160	9.4	5.6	10.6	6.7		Bruce Knudsen
db 142	3	ras cuff	7	BAD AS IT GETS	1	110.38	2012-04-10	dbdb (BLKS)	2012-02-21	RAS - Cuff	7	34	No intervention	2012-04-17	1	8	33.7	140	190	140	9.9	5.8	10.8	7.2		Bruce Knudsen
db 160	0	ras cuff	14	normal	0	39.51	2012-05-09	dbdb (BLKS)	2012-03-20	RAS - Cuff	7.1	32.4	No intervention	2012-05-22	2	9.1	36.3	80	170	140						Bruce Knudsen
db 159	0	ras cuff	14	normal	0	58.41	2012-05-09	dbdb (BLKS)	2012-03-20	RAS - Cuff	7.1	33.7	No intervention	2012-05-22	2	9.1	35.8	150	230	150						Bruce Knudsen
db 158	3	ras cuff	14	heamorhage into walls	2	109.18	2012-05-09	dbdb (BLKS)	2012-03-20	RAS - Cuff	7.1	35.7	No intervention	2012-05-22	2	9.1	32.9	100	200	150						Bruce Knudsen
db 157	1	ras cuff	14	mild SM drop out	1	88.35	2012-05-09	dbdb (BLKS)	2012-03-20	RAS - Cuff	7.1	29.8	No intervention	2012-05-21	2	9.1	26.6	150	190	130						Bruce Knudsen
db 156	3	ras cuff	14	extensive inflammation, complete destruction of wall,thrombosis	0		2012-05-09	dbdb (BLKS)	2012-03-20	RAS - Cuff	7.1	34.6	No intervention	2012-05-21	2	9.1	36.5	140	180	130						Bruce Knudsen
db 155	3	ras cuff	14	aortic rupture, myocyte necrosis, fibrin deposition, RBC in wall,	3		2012-05-09	dbdb (BLKS)	2012-03-20	RAS - Cuff	7.1	37	No intervention	2012-05-21	2	9.1	37	110	190	140						Bruce Knudsen
db 154	0	ras cuff	14	normal	0	63.29	2012-05-09	dbdb (BLKS)	2012-03-20	RAS - Cuff	7.1	37.7	No intervention	2012-05-21	2	9.1	38.6	170	270	120						Bruce Knudsen
db 153	3	ras cuff	14	inflammation, myocyte necrosis, haemorhage into wall	2	38.98	2012-05-09	dbdb (BLKS)	2012-03-20	RAS - Cuff	7.1	38.2	No intervention	2012-05-21	2	9.1	30.2	120	190	150						Bruce Knudsen
db 152	2	ras cuff	14	SM drop out	1	60.37	2012-05-09	dbdb (BLKS)	2012-03-20	RAS - Cuff	7.1	35.1	No intervention	DOD ?	N/A	N/A	N/A	N/A	N/A	N/A					Died pre harvest no organs harvested	Bruce Knudsen
db 151	3	ras cuff	14	myocyte necrosis, aortic rupture,heamorhage into wall	3	104.75	2012-05-09	dbdb (BLKS)	2012-03-20	RAS - Cuff	7.1	36.1	No intervention	2012-05-21	2	9.1	30.8	90	190	150						Bruce Knudsen
db 83	1	ras cuff	29	mild SM drop out	2	66.07	2012-01-10	dbdb (BLKS)	2011-11-23	RAS - Cuff	6.9	31.4	Vehicle control/Hydralazine	2012-02-08	4.1	11	28.1	40	220	190						Bruce Knudsen
db 82	1	ras cuff	29	mild SM drop out	0	46.39	2012-01-10	dbdb (BLKS)	2011-11-23	RAS - Cuff	6.9	30.6	Hydralazine	2012-02-08	4.1	11	31.5	60	310	120						Bruce Knudsen
db 81	1	ras cuff	29	mild SM drop out	2	54.62	2012-01-10	dbdb (BLKS)	2011-11-23	RAS - Cuff	6.9	34.2	Vehicle control/Hydralazine	2012-02-08	4.1	11	26.6	50	250	150						Bruce Knudsen
db 69	0	ras cuff	30	normal	1	62.92	2011-10-19	dbdb (BLKS)	2011-09-06	RAS - Cuff	6.1	24	Vehicle control/Losartan	2011-11-18	4.3	10.4	32.1	40	220	130	6.2	4.1	11	7.2		Bruce Knudsen
db 68	1	ras cuff	30	mild SM drop out	1	56.11	2011-10-19	dbdb (BLKS)	2011-09-06	RAS - Cuff	6.1	30.9	Vehicle control/Losartan	2011-11-18	4.3	10.4	32.2	90	190	140	8.3	4.9	11	6.7		Bruce Knudsen
db 67	1	ras cuff	30	mild SM drop out	2	74.41	2011-10-19	dbdb (BLKS)	2011-09-06	RAS - Cuff	6.1	32.9	Vehicle control/Losartan	2011-11-18	4.3	10.4	37.4	50	210	160	6.9	4.6	11.2	7.2		Bruce Knudsen
db 66	0	ras cuff	30	normal	0	58.21	2011-10-19	dbdb (BLKS)	2011-09-06	RAS - Cuff	6.1	34.9	Vehicle control/Losartan	2011-11-18	4.3	10.4	35.3	80	270	150	6.5	4.3	11.2	7.3		Bruce Knudsen
db 50	1	ras cuff	42	mild SM drop out	0	68.06	2011-08-22	dbdb (BLKS)	2011-07-12	RAS - Cuff	5.9	32.2	No intervention	2011-10-03	6	11.9	47	90	250	180	7.7	5.2	11	8.1		Bruce Knudsen
db 49	1	ras cuff	42	mild SM drop out	3	113.83	2011-08-22	dbdb (BLKS)	2011-07-12	RAS - Cuff	5.9	32.7	No intervention	2011-10-03	6	11.9	42.2	40	250	170	6.1	5.1	11.5	7.3		Bruce Knudsen
db 48	2	ras cuff	42	moderate SM drop out	1	61.09	2011-08-22	dbdb (BLKS)	2011-07-12	RAS - Cuff	5.9	33.2	No intervention	2011-10-03	6	11.9	46.3	60	250	210	6.7	5	11.2	7.7		Bruce Knudsen
db 47	0	ras cuff	42	normal	0	91.81	2011-08-22	dbdb (BLKS)	2011-07-12	RAS - Cuff	5.9	28.9	No intervention	2011-10-03	6	11.9	42.6	140	240	150	8.4	5.7	11.6	7.4		Bruce Knudsen
db 46	1	ras cuff	42	mild	1	109.48	2011-08-22	dbdb (BLKS)	2011-07-12	RAS - Cuff	5.9	30.5	No intervention	2011-10-03	6	11.9	45.2	70	280	160	7.3	5.1	12.1	7.4		Bruce Knudsen
db 45	0	ras cuff	42	normal	0	66.43	2011-08-22	dbdb (BLKS)	2011-07-12	RAS - Cuff	5.9	34.2	No intervention	2011-10-03	6	11.9	37.5	30	230	140	5.4	3.7	11.7	6.8		Bruce Knudsen
db 44	2	ras cuff	42	Moderate SM drop out	2	85.75	2011-08-22	dbdb (BLKS)	2011-07-12	RAS - Cuff	5.9	24.7	No intervention	2011-10-03	6	11.9	47.6	50	290	190	6.9	4.6	11.8	7.8		Bruce Knudsen
db 43	0	ras cuff	42	normal	0	56.69	2011-08-22	dbdb (BLKS)	2011-07-12	RAS - Cuff	5.9	33.7	No intervention	2011-10-03	6	11.9	37.4	30	310	120	5.1	4	12.3	8.4		Bruce Knudsen
db 42	0	ras cuff	42	normal	3	61.79	2011-08-22	dbdb (BLKS)	2011-07-12	RAS - Cuff	5.9	29.4	No intervention	2011-10-03	6	11.9	44.2	70	260	150	7.6	5.5	11.6	7.2		Bruce Knudsen
db 41	2	ras cuff	42	moderate isolated drop out	0	86.9	2011-08-22	dbdb (BLKS)	2011-07-12	RAS - Cuff	5.9	33.9	No intervention	2011-10-03	6	11.9	45	50	300	160	6.3	4.5	12.4	8		Bruce Knudsen
db 101	0	ras cuff	42	normal	2	55.38	2012-01-13	dbdb (BLKS)	2011-11-20	RAS - Cuff	7.7	38.1	No intervention	2012-02-24	6	13.7	37.8	100	380	210	8.6	5.5	13.6	8.6		Bruce Knudsen
db 106	3	ras cuff	42	BAD AS IT GETS	2	57.88	2012-01-13	dbdb (BLKS)	2011-11-20	RAS - Cuff	7.7	35.7	No intervention	2012-02-24	6	13.7	27.6	40	340	180	5.7	4.4	12.7	8.1		Bruce Knudsen
db 56	2	ras cuff	90	Ruptured and inflamed	2	88.01	2011-09-08	dbdb (BLKS)	2011-07-12	RAS - Cuff	8.3	39.9	No intervention	2011-12-07	12.9	21.1	30.1	30	270	230						Bruce Knudsen
db 57	1	ras cuff	104	mild SM drop out	0	55.27	2011-09-08	dbdb (BLKS)	2011-07-12	RAS - Cuff	8.3	35.1	No intervention	2011-12-21	14.9	23.1	47.8	200	290	200						Bruce Knudsen
db 114	0	ras cuff	116	normal	2	69	2012-01-06	dbdb (BLKS)	2011-11-23	RAS - Cuff	6.3	29	No intervention	2012-05-01	16.6	22.9	45.6	190	350	170					Occlusion RRA-imaged	Bruce Knudsen
db 113	3	ras cuff	116	degeneration of wall old heamorhage, moderate	2	124.72	2012-01-06	dbdb (BLKS)	2011-11-23	RAS - Cuff	6.3	30.3	No intervention	2012-05-01	16.6	22.9	39.5	180	480	220						Bruce Knudsen
db 112	1	ras cuff	116	mild SM drop out	0	108.46	2012-01-06	dbdb (BLKS)	2011-11-23	RAS - Cuff	6.3	26.7	No intervention	2012-05-01	16.6	22.9	27.5	40	380	230						Bruce Knudsen
db 111	0	ras cuff	116	normal	3	49.11	2012-01-06	dbdb (BLKS)	2011-11-23	RAS - Cuff	6.3	32.4	No intervention	2012-05-01	16.6	22.9	41.7	70	500	210						Bruce Knudsen
db 124	2	ras cuff	117	inflammation in adventitia, focal smooth muscle drop out moderate	2	114.26	2012-01-06	dbdb (BLKS)	2011-11-23	RAS - Cuff	6.3	34.2	No intervention	2012-05-02	16.7	23	49.2	80	330	350						Bruce Knudsen
db 122	2	ras cuff	117	moderate SM drop out	1	77.69	2012-01-06	dbdb (BLKS)	2011-11-23	RAS - Cuff	6.3	30.8	No intervention	2012-05-02	16.7	23	30.4	70	400	210						Bruce Knudsen
DBC Sham
dbc 165	0	sham	3	normal	0	44.16	2012-04-27	dbc (BLKS)	2012-03-06	Sham	7.4	21.4	No intervention	2012-04-30	0.4	7.9	20.3	220	190	130	11.7	6.8	10.8	6.7		Bruce Knudsen
dbc 164	0	sham	3	normal	1	47.23	2012-04-27	dbc (BLKS)	2012-03-06	Sham	7.4	21.2	No intervention	2012-04-30	0.4	7.9	21	210	180	120	11.1	6.6	10.96	6.5		Bruce Knudsen
dbc 163	0	sham	3	normal	0	37.28	2012-04-27	dbc (BLKS)	2012-03-06	Sham	7.4	21	No intervention	2012-04-30	0.4	7.9	20.9	200	190	140	11.1	6.2	11.2	6.7		Bruce Knudsen
dbc 162	0	sham	3	normal	0	37.8	2012-04-27	dbc (BLKS)	2012-03-06	Sham	7.4	21.1	No intervention	2012-04-30	0.4	7.9	20.5	210	190	100	11.5	6.3	11	7.1		Bruce Knudsen
dbc 161	0	sham	3	normal	0	47.51	2012-04-27	dbc (BLKS)	2012-03-06	Sham	7.4	20.7	No intervention	2012-04-30	0.4	7.9	20.6	200	180	130	11.3	6.2	10.6	6.7		Bruce Knudsen
dbc 145	0	sham	8	normal	0	55.26	2012-04-11	dbc (BLKS)	2012-02-21	Sham	7.1	21.7	No intervention	2012-04-19	1.1	8.3	21.1	220	180	140	11.5	6.1	11.6	6.2		Bruce Knudsen
dbc 144	0	sham	8	normal	0	65.22	2012-04-11	dbc (BLKS)	2012-02-21	Sham	7.1	19.8	No intervention	2012-04-19	1.1	8.3	20.4	220	210	120	11.4	6.3	11.1	6.6		Bruce Knudsen
dbc 143	0	sham	8	normal	0	55.4	2012-04-11	dbc (BLKS)	2012-02-21	Sham	7.1	21.1	No intervention	2012-04-19	1.1	8.3	22	220	190	120	11.3	7.1	10.9	6.5		Bruce Knudsen
dbc 142	0	sham	8	normal	0	47.03	2012-04-11	dbc (BLKS)	2012-02-21	Sham	7.1	21.5	No intervention	2012-04-19	1.1	8.3	22.7	250	210	120	11.7	6.4	11.4	7		Bruce Knudsen
dbc 141	0	sham	8	normal	0	48.83	2012-04-11	dbc (BLKS)	2012-02-21	Sham	7.1	20.6	No intervention	2012-04-19	1.1	8.3	21.2	220	190	130	12	6.4	10.9	6.7		Bruce Knudsen
dbc 51	0	sham	42	normal	1	44.41	2011-08-24	dbc (BLKS)	2011-07-12	Sham	6.1	19.3	No intervention	2011-10-05	6	12.1	25	200	210	150	10.8	6.3	11.3	6.6		Bruce Knudsen
dbc 52	0	sham	42	normal	1	53.78	2011-08-24	dbc (BLKS)	2011-07-12	Sham	6.1	19.9	No intervention	2011-10-05	6	12.1	24.7	180	190	120	10.5	6.2	10.2	6.8		Bruce Knudsen
dbc 53	0	sham	42	normal	0		2011-08-24	dbc (BLKS)	2011-07-12	Sham	6.1	19.7	No intervention	2011-10-05	6	12.1	25.9	210	200	150	10.5	6.5	10.8	7		Bruce Knudsen
dbc 54	0	sham	42	normal	0	94.98	2011-08-24	dbc (BLKS)	2011-07-12	Sham	6.1	19.1	No intervention	2011-10-05	6	12.1	24.2	200	170	120	10.8	5.9	10.4	6.6		Bruce Knudsen
dbc 55	0	sham	42	normal	1	52.08	2011-08-24	dbc (BLKS)	2011-07-12	Sham	6.1	19.9	No intervention	2011-10-05	6	12.1	24.6	210	200	140	11.1	6.4	10.9	6.6		Bruce Knudsen
dbc 115	0	sham	117	normal	0	66.01	2012-01-07	dbc (BLKS)	2011-11-23	Sham	6.4	17.7	No intervention	2012-05-04	16.9	23.3	26.3	260	240	160						Bruce Knudsen
dbc 113	0	sham	117	normal	0	61.89	2012-01-07	dbc (BLKS)	2011-11-23	Sham	6.4	19	No intervention	2012-05-03	16.7	23.1	28	270	250	160						Bruce Knudsen
dbc 112	0	sham	117	normal	0	48.54	2012-01-07	dbc (BLKS)	2011-11-23	Sham	6.4	20.1	No intervention	2012-05-03	16.7	23.1	26.4	230	220	140						Bruce Knudsen
dbc 111	0	sham	117	normal	0	47.09	2012-01-07	dbc (BLKS)	2011-11-23	Sham	6.4	18.5	No intervention	2012-05-03	16.7	23.1	26.9	250	240	150						Bruce Knudsen
DB Sham
db 150	0	sham	7	normal	0	27.42	2012-04-11	dbdb (BLKS)	2012-02-21	Sham	7.1	28.9	No intervention	2012-04-18	1	8.1	32.3	210	150	120	11.5	6.5	9.7	6.3		Bruce Knudsen
db 149	0	sham	7	normal	0	63.73	2012-04-11	dbdb (BLKS)	2012-02-21	Sham	7.1	28	No intervention	2012-04-18	1	8.1	28	190	160	120	10.4	6.4	10.1	6.5		Bruce Knudsen
db 148	0	sham	7	normal	0	58.33	2012-04-11	dbdb (BLKS)	2012-02-21	Sham	7.1	29.4	No intervention	2012-04-18	1	8.1	32.4	220	170	120	11.2	6.5	10.1	7.2		Bruce Knudsen
db 147	0	sham	7	normal	0	65.39	2012-04-11	dbdb (BLKS)	2012-02-21	Sham	7.1	30.6	No intervention	2012-04-18	1	8.1	33.3	150	230	120	9.6	5.7	11.5	7.4		Bruce Knudsen
db 146	0	sham	7	normal	0	50.84	2012-04-11	dbdb (BLKS)	2012-02-21	Sham	7.1	32.3	No intervention	2012-04-18	1	8.1	35.1	230	220	130	11.6	7	11.2	7.4		Bruce Knudsen
db 164	0	sham	13	normal	0	27.29	2012-05-10	dbdb (BLKS)	2012-03-20	Sham	7.1	38.3	No intervention	2012-05-23	2	9.3	33.1	140	240	150						Bruce Knudsen
db 161	0	sham	13	normal	1	74.6	2012-05-09	dbdb (BLKS)	2012-03-20	Sham	7.3	33.3	No intervention	2012-05-22	2	9.3	38.9	210	210	160						Bruce Knudsen
db 55	0	sham	42	normal	0	108.79	2011-08-24	dbdb (BLKS)	2011-07-12	Sham	6.1	31.8	No intervention	2011-10-05	6	12.1	31.4	190	240	110	9.9	6.3	12	6.7		Bruce Knudsen
db 54	0	sham	42	normal	1	51.74	2011-08-24	dbdb (BLKS)	2011-07-12	Sham	6.1	33	No intervention	2011-10-05	6	12.1	36.9	240	190	120	11.3	6.3	10.9	6.6		Bruce Knudsen
db 53	0	sham	42	normal	1	66.41	2011-08-24	dbdb (BLKS)	2011-07-12	Sham	6.1	32.3	No intervention	2011-10-05	6	12.1	39.9	220	220	120	10.8	6.8	10.6	7.1		Bruce Knudsen
db 52	0	sham	42	normal	1	74.42	2011-08-24	dbdb (BLKS)	2011-07-12	Sham	6.1	34.1	No intervention	2011-10-05	6	12.1	43.5	230	210	130	11	6.7	10.6	6.8		Bruce Knudsen
db 51	0	sham	42	normal	0	73.01	2011-08-24	dbdb (BLKS)	2011-07-12	Sham	6.1	30.1	No intervention	2011-10-05	6	12.1	34.7	190	190	110	10.1	6.6	10.3	7.1		Bruce Knudsen
db 165	0	sham	42	normal	0	67.55	2012-05-10	dbdb (BLKS)	2012-03-20	Sham	7.3	39.2	No intervention	2012-05-23	2	9.3	41.5	120	190	180						Bruce Knudsen
db 109	0	sham	42	normal	0	35.6	2012-01-13	dbdb (BLKS)	2011-11-20	Sham	7.7	31.2	No intervention	2012-02-24	6	13.7	36.3	230	240	120	11.1	6.9	11.4	7.5		Bruce Knudsen
db 108	0	sham	42	normal	0	53.41	2012-01-13	dbdb (BLKS)	2011-11-20	Sham	7.7	31.9	No intervention	2012-02-24	6	13.7	29.8	240	230	130	10.9	6.9	10.6	6.9		Bruce Knudsen
db 107	0	sham	42	normal	0	35.49	2012-01-13	dbdb (BLKS)	2011-11-20	Sham	7.7	24.1	No intervention	2012-02-24	6	13.7	30	180	170	110	9.8	6.3	10	6.1		Bruce Knudsen
db 117	0	sham	116	normal	0	61.89	2012-01-07	dbdb (BLKS)	2011-11-23	Sham	6.4	31.6	No intervention	2012-05-02	16.6	23	27	410	330	170						Bruce Knudsen
db 116	0	sham	116	normal	0	62.92	2012-01-07	dbdb (BLKS)	2011-11-23	Sham	6.4	32.4	No intervention	2012-05-02	16.6	23	24.4	350	320	150						Bruce Knudsen
db 115	0	sham	116	normal	0	52.37	2012-01-06	dbdb (BLKS)	2011-11-23	Sham	6.3	30.7	No intervention	2012-05-01	16.6	22.9	26.4	240	230	120					Changed to sham due to RAA atypical-imaged	Bruce Knudsen
db 120	0	sham	117	normal	0	47.7	2012-01-07	dbdb (BLKS)	2011-11-23	Sham	6.4	26.7	No intervention	2012-05-03	16.7	23.1	30.5	300	250	140						Bruce Knudsen
db 119	0	sham	117	normal	0	50.76	2012-01-07	dbdb (BLKS)	2011-11-23	Sham	6.4	33	No intervention	2012-05-03	16.7	23.1	26	370	310	130						Bruce Knudsen
						842.06

## Sheet: ROI Statistics
FileName	Time (ms)	Z Pos	X Pos	Y Pos	ROI ID	ROI Area	ROI Mean Intensity	ROI Min Intensity	ROI Max Intensity	ROI Sum Intensity	ROI StDev Intensity	ROI Signal/Background	Binary Area	Binary Mean Intensity	Binary Min Intensity	Binary Max Intensity	Binary Sum Intensity	Binary StDev Intensity	Binary Signal/Background	Area Fraction	Unit	Channel	average area
DB SHAM
db 55
Live	358655	0	0	0	N/A	160886	487.659	70	1023	1534042296	225.995	7.46715	1708.02	748.654	645.333	836.333	2.5002e+07	37.9929	1.2866	0.010616	µm	RGB
Live	375818	0	0	0	N/A	160886	494.321	91.6667	1023	1.555e+09	223.505	6.86577	1221.94	749.258	647.333	836.667	1.79013e+07	37.3779	1.27829	0.007595	µm	RGB
Live	392219	0	0	0	N/A	160886	482.943	100.333	1023	1.51921e+09	182.37	6.47468	1623.73	744.929	648	837	2.365e+07	38.1573	1.27093	0.010092	µm	RGB
Live	407502	0	0	0	N/A	160886	485.921	86	1023	1.52858e+09	218.649	6.39375	1670.99	751.081	645.333	837.333	24539332	37.9471	1.27871	0.010386	µm	RGB
Live	420565	0	0	0	N/A	160886	462.856	105	1023	1456018268	190.312	5.87931	1759.98	739.815	646.333	838	25458500	35.499	1.27829	0.010939	µm	RGB
Live	439947	0	0	0	N/A	160886	432.796	89.3333	1023	1.36146e+09	175.585	5.98246	1547.22	742.543	648	837.667	2.24634e+07	35.7933	1.27718	0.009617	µm	RGB
db 54
Live	582758	0	0	0	N/A	160886	494.661	109.333	1023	1556069960	197.752	5.38421	4807.98	663.266	523.667	837.333	6.23523e+07	72.2527	1.57685	0.029884	µm	RGB
Live	614454	0	0	0	N/A	160886	618.533	114.333	1023	1.94574e+09	256.128	5.1407	7900.99	694.135	526.667	837.667	1.07233e+08	65.3688	1.56473	0.049109	µm	RGB
Live	688283	0	0	0	N/A	160886	463.857	104.333	1023	1.45917e+09	149.383	6.16265	5207.93	644.62	471.667	846	6.56404e+07	56.7598	1.68337	0.03237	µm	RGB
Live	699475	0	0	0	N/A	160886	496.492	111	1023	1.56183e+09	212.915	6.05325	4291.02	645.036	493.333	845	54118484	54.889	1.63353	0.026671	µm	RGB
Live	736012	0	0	0	N/A	160886	468.847	137	1023	1.47487e+09	163.766	5.44149	4313.32	633.583	507.667	845	5.34339e+07	52.4879	1.5897	0.02681	µm	RGB
Live	758403	0	0	0	N/A	160886	507.112	95	1023	1.59524e+09	231.036	6.31482	6158.4	652.613	502	846	7.85825e+07	63.1626	1.62042	0.038278	µm	RGB
db 53
Live	856825	0	0	0	N/A	160886	508.058	91	1023	1.59821e+09	235.614	6.64286	3864.88	715.594	528	848	5.4076e+07	55.0055	1.52347	0.024022	µm	RGB
Live	873229	0	0	0	N/A	160886	463.403	81.3333	1023	1.45774e+09	194.419	6.39375	3744.79	718.882	536.333	847.667	5.26365e+07	52.1146	1.5709	0.023276	µm	RGB
Live	889266	0	0	0	N/A	160886	472.491	98.3333	1023	1.48633e+09	137.355	5.71508	3740.09	700.652	519.333	846	51237288	50.744	1.54512	0.023247	µm	RGB
Live	916480	0	0	0	N/A	160886	475.997	88	1023	1497357264	182.112	6.2378	3235.81	716.519	537	846.333	4.53327e+07	55.3963	1.55535	0.020112	µm	RGB
Live	934380	0	0	0	N/A	160886	501.594	82.6667	1023	1577879528	178.488	5.32812	3089.12	705.442	529	847.667	42608684	52.0338	1.5337	0.019201	µm	RGB
Live	947442	0	0	0	N/A	160886	548.767	70	1023	1726273016	256.248	6.6	2964.54	720.98	520	846	4.17909e+07	52.4465	1.55433	0.018426	µm	RGB
db 52
Live	1.05854e+06	0	0	0	N/A	160886	459.443	124	1023	1.44528e+09	151.656	5.33158	1690.63	689.62	516.333	835.333	22796076	48.1579	1.55827	0.010508	µm	RGB
Live	1.07234e+06	0	0	0	N/A	160886	502.224	117.333	1023	1.57986e+09	186.542	5.5	2643.14	691.186	525	835.333	3.57205e+07	52.6115	1.5541	0.016429	µm	RGB
Live	1.08166e+06	0	0	0	N/A	160886	544.328	122.333	1023	1712306996	234.147	4.82547	1569.32	696.512	539.667	837.333	21371776	55.547	1.51268	0.009754	µm	RGB
Live	1.09508e+06	0	0	0	N/A	160886	482.652	117.667	1023	1518291688	193.791	5.01471	1316.05	692.499	522.333	834.667	1.78194e+07	54.815	1.59387	0.00818	µm	RGB
Live	1.11858e+06	0	0	0	N/A	160886	486.089	132	1023	1529103540	193.015	5.1407	773.917	692.567	538.333	833.667	10479920	48.6253	1.54833	0.00481	µm	RGB
Live	1.13648e+06	0	0	0	N/A	160886	486.612	112.333	1023	1530748720	195.39	5.19289	1556.43	695.264	528.667	836.667	2.11583e+07	55.51	1.54344	0.009674	µm	RGB
db 51
Live	1.24872e+06	0	0	0	N/A	160886	502.739	136.667	1023	1.58148e+09	181.39	4.75814	1100.83	678.727	476	833.667	1.46089e+07	51.451	1.75	0.006842	µm	RGB
Live	1.26139e+06	0	0	0	N/A	160886	489.085	134.333	1023	1.53853e+09	181.378	4.52655	1160.57	677.26	481.333	835	1.53684e+07	57.0276	1.71253	0.007214	µm	RGB
Live	1.27557e+06	0	0	0	N/A	160886	497.66	114	1023	1.5655e+09	181.787	5.2732	2093.03	686.227	469.667	836.333	2.80831e+07	53.361	1.65476	0.013009	µm	RGB
Live	1.28675e+06	0	0	0	N/A	160886	451.922	107.333	1023	1421623096	119.774	5.71508	1435.52	675.029	485	832	1.89467e+07	50.5594	1.70516	0.008923	µm	RGB
Live	1.29831e+06	0	0	0	N/A	160886	516.345	119	1023	1.62428e+09	225.314	5.16667	2328.09	683.718	433.333	837	3.11228e+07	62.7876	1.73904	0.01447	µm	RGB
Live	1.31211e+06	0	0	0	N/A	160886	487.033	124.667	1023	1.53207e+09	181.232	4.82547	1205.17	679.686	471.333	836.667	1.60161e+07	57.6153	1.7707	0.007491	µm	RGB
db 165
Live	1.43106e+06	0	0	0	N/A	160886	412.354	63	1023	1.29715e+09	199.22	6.55769	4004.4	684.674	435	837	5.36072e+07	67.7454	1.79355	0.02489	µm	RGB
Live	1.44523e+06	0	0	0	N/A	160886	459.33	99.3333	1023	1.44493e+09	190.933	6.51592	5724.9	673.776	433	837.667	75419784	69.6402	1.77447	0.035583	µm	RGB
Live	1.46238e+06	0	0	0	N/A	160886	442.482	56.6667	1023	1.39193e+09	167.404	7.30714	8961.52	661.598	446.333	838	115925204	71.2076	1.80477	0.055701	µm	RGB
Live	1.4993e+06	0	0	0	N/A	160886	408.326	42.6667	1023	1.28448e+09	171.29	8.38525	3473.52	664.465	449	836.667	4.51278e+07	65.6215	1.78159	0.02159	µm	RGB
Live	1.5142e+06	0	0	0	N/A	160886	400.454	67	1023	1.25972e+09	127.997	7.63433	3142.11	660.584	442.333	836	40583628	67.062	1.7735	0.01953	µm	RGB
Live	1.52539e+06	0	0	0	N/A	160886	409.278	76.6667	1023	1.28748e+09	175.154	7.20423	3027.75	674.806	463.667	836.333	39948508	58.3233	1.66265	0.018819	µm	RGB
db 164
Live	1.57909e+06	0	0	0	N/A	160886	428.069	39.3333	1023	1.34659e+09	209.138	7.10417	4396.58	677.219	435.333	836.333	5.82165e+07	64.8561	1.77021	0.027327	µm	RGB
Live	1.5914e+06	0	0	0	N/A	160886	422.841	92.6667	1023	1.33014e+09	198.96	6.16265	4683.4	671.415	449	837.667	6.14828e+07	68.0846	1.76271	0.02911	µm	RGB
Live	1.60593e+06	0	0	0	N/A	160886	416.82	60.6667	1023	1.3112e+09	208.3	6.68628	5062.27	672.329	442	838	6.65471e+07	76.4753	1.82895	0.031465	µm	RGB
Live	1.62122e+06	0	0	0	N/A	160886	432.905	97.6667	1023	1361801964	234.102	6.73026	3888.2	683.514	455.333	838	51963448	65.2742	1.71753	0.024167	µm	RGB
Live	1.64061e+06	0	0	0	N/A	160886	500.605	94.3333	1023	1.57477e+09	291.157	7.80916	4188.11	678.957	441.667	836.667	5.55984e+07	73.5338	1.88262	0.026031	µm	RGB
Live	1.65068e+06	0	0	0	N/A	160886	430.922	71.6667	1023	1.35556e+09	155.621	10.1287	3329.3	673.107	474	833.333	4.38166e+07	59.2992	1.658	0.020693	µm	RGB
db 163
Live	1.7495e+06	0	0	0	N/A	160886	463.323	103.333	1023	1.45749e+09	138.227	5.91329	6986.53	669.685	461.333	838	9.14817e+07	55.4538	1.64016	0.043425	µm	RGB
Live	1.84121e+06	0	0	0	N/A	160886	461.345	89	1023	1451266880	171.003	6.08929	5365.25	671.554	443.333	832.667	7.04487e+07	54.7362	1.72917	0.033348	µm	RGB
Live	1.85912e+06	0	0	0	N/A	160886	475.409	86	1023	1.49551e+09	199.659	6.2	6676.39	671.943	451.333	837	87715440	64.2917	1.72407	0.041498	µm	RGB
Live	1.87032e+06	0	0	0	N/A	160886	487.04	114.333	1023	1532096392	145.616	5.52973	7936.8	662.119	461.667	838	1.0275e+08	54.1594	1.74364	0.049332	µm	RGB
Live	1.8815e+06	0	0	0	N/A	160886	493.655	91	1023	1.5529e+09	161.404	5.98246	7047.91	666.629	469.667	835.333	91864200	52.9299	1.68293	0.043807	µm	RGB
Live	1.91993e+06	0	0	0	N/A	160886	497.922	112.333	1023	1.56633e+09	145.757	5.8125	9421.82	661.375	457	837.667	121838460	60.3464	1.70988	0.058562	µm	RGB
db 162
Live	2.0202e+06	0	0	0	N/A	160886	571.265	172.333	1023	1797043868	248.564	4.52655	4346.46	725.498	601.667	838	6.16557e+07	44.88	1.34733	0.027016	µm	RGB
Live	2.02956e+06	0	0	0	N/A	160886	522.999	170.333	1023	1.64521e+09	188.153	4.46725	2548.22	714.086	613	837	3.55786e+07	40.4584	1.3328	0.015839	µm	RGB
Live	2.03772e+06	0	0	0	N/A	160886	566.024	129	1023	1.78056e+09	211.45	4.04348	4594.2	719.265	615.667	837.667	64610144	42.984	1.3376	0.028556	µm	RGB
Live	2.04408e+06	0	0	0	N/A	160886	523.824	31	1023	1.64781e+09	215.815	4.62896	1083.85	735.133	611.333	838	15578944	43.0555	1.34952	0.006737	µm	RGB
Live	2.05377e+06	0	0	0	N/A	160886	511.195	170.333	1023	1.60808e+09	191.081	3.96512	626.417	724.484	631.333	834.333	8.87349e+06	41.7255	1.31962	0.003894	µm	RGB
Live	2.06346e+06	0	0	0	N/A	160886	526.666	18.3333	1023	1656748968	201.333	33	1640.51	726.938	611	837.667	23317272	44.8587	1.33654	0.010197	µm	RGB
db 161
Live	2.19844e+06	0	0	0	N/A	160886	491.361	142	1023	1545688360	203.76	4.87143	20672	660.399	509	837	2.66925e+08	67.7217	1.6	0.128488	µm	RGB
Live	2.22005e+06	0	0	0	N/A	160886	469.206	44	1023	1475995204	189.81	5.35602	5297.54	684.151	509	836.667	70864360	60.8196	1.57386	0.032927	µm	RGB
Live	2.23052e+06	0	0	0	N/A	160886	461.093	117.667	1023	1450473728	201.555	4.65	5944.21	684.608	518.667	838	7.95678e+07	62.6153	1.57576	0.036947	µm	RGB
Live	2.24544e+06	0	0	0	N/A	160886	543.173	51.6667	1023	1.70867e+09	227.592	4.22727	3850.56	701.602	534.667	837.333	5.28222e+07	57.7069	1.50451	0.023933	µm	RGB
Live	2.26032e+06	0	0	0	N/A	160886	539.898	182.667	1023	1.69837e+09	212.774	3.94981	1936.94	701.509	551.667	836.667	2.65675e+07	56.4735	1.4991	0.012039	µm	RGB
Live	2.27337e+06	0	0	0	N/A	160886	513.194	58	1023	1614368692	215.216	4.46725	3728.63	700.39	523.667	837	5.10612e+07	58.6356	1.53211	0.023176	µm	RGB
db 150
Live	2.41323e+06	0	0	0	N/A	160886	458.522	55	1023	1442386168	195.041	7.20423	4958.35	690.292	521	837.333	66922384	61.145	1.55597	0.030819	µm	RGB
Live	2.42402e+06	0	0	0	N/A	160886	424.809	68.6667	1023	1.33633e+09	150.179	6.59091	3497.26	685.494	516.667	835.667	4.68741e+07	57.7294	1.57495	0.021737	µm	RGB
Live	2.43222e+06	0	0	0	N/A	160886	459.985	57	1023	1446988504	179.632	6.2	3719.84	692.087	516	837.333	50336900	57.525	1.58175	0.023121	µm	RGB
Live	2.4408e+06	0	0	0	N/A	160886	476.595	89.6667	1023	1.49924e+09	143.977	6.08929	3277.13	682.635	520.667	837	4.37405e+07	49.5304	1.56285	0.020369	µm	RGB
Live	2.45907e+06	0	0	0	N/A	160886	403.26	95.3333	1023	1.26855e+09	174.147	7.20423	2561.11	691.119	510.333	835.333	3.46085e+07	58.7031	1.56767	0.015919	µm	RGB
Live	2.46765e+06	0	0	0	N/A	160886	437.232	52.3333	1023	1375412944	146.884	7.35507	4228.42	687.098	515.333	838	56806548	59.2885	1.54749	0.026282	µm	RGB
db 149
Live	2.55564e+06	0	0	0	N/A	160886	525.747	160.333	1023	1653857864	153.198	4.04348	2267.74	717.686	575.667	838	31822180	47.1119	1.39232	0.014095	µm	RGB
Live	2.56608e+06	0	0	0	N/A	160886	556.594	168	1023	1.75089e+09	186.128	4.02756	2433.66	716.874	574	836.333	3.41117e+07	46.5394	1.40948	0.015127	µm	RGB
Live	2.57242e+06	0	0	0	N/A	160886	526.607	197.333	1023	1656563932	157.436	3.60211	1064.62	712.935	599.333	837.667	1.48405e+07	43.474	1.39102	0.006617	µm	RGB
Live	2.57727e+06	0	0	0	N/A	160886	516.351	137	1023	1.6243e+09	151.146	4.125	1515.72	719.39	583	835.333	21319840	47.263	1.38206	0.009421	µm	RGB
Live	2.58511e+06	0	0	0	N/A	160886	472.171	113.333	1023	1.48532e+09	184.487	4.44783	1863.09	715.779	587	837.667	26074404	46.3606	1.39699	0.01158	µm	RGB
Live	2.59741e+06	0	0	0	N/A	160886	635.567	122.667	1023	1.99932e+09	283.771	5.30052	2424.25	724.264	572.667	838	3.43301e+07	50.0809	1.41286	0.015068	µm	RGB
db 148
Live	2.67087e+06	0	0	0	N/A	160886	544	135.333	1023	1.71128e+09	206.824	4.56696	966.629	724.258	608.667	836.333	1.36885e+07	45.1541	1.37007	0.006008	µm	RGB
Live	2.67944e+06	0	0	0	N/A	160886	535.505	130	1023	1684554616	209.842	4.73611	1323.62	718.604	584	837	18597468	46.4021	1.41385	0.008227	µm	RGB
Live	2.68802e+06	0	0	0	N/A	160886	540.866	134.333	1023	1.70142e+09	183.734	4.62896	1007.75	718.418	583	836.333	1.41557e+07	46.0003	1.42321	0.006264	µm	RGB
Live	2.69697e+06	0	0	0	N/A	160886	492.941	120	1023	1.55066e+09	212.849	5.8125	1034.96	715.992	573.333	837.667	14488820	45.8299	1.40504	0.006433	µm	RGB
Live	2.70331e+06	0	0	0	N/A	160886	521.482	116	1023	1.64044e+09	156.715	4.44783	1011.02	726.195	580	834	1.43554e+07	46.0176	1.36782	0.006284	µm	RGB
Live	2.71039e+06	0	0	0	N/A	160886	560.14	98.6667	1023	1762047408	185.593	4.65	865.568	714.892	592	831.667	12098836	45.6929	1.40372	0.00538	µm	RGB
db 147
Live	2.80584e+06	0	0	0	N/A	160886	578.988	199.667	1023	1821339120	201.798	3.55208	1280.86	702.21	540.333	837.333	1.75861e+07	56.286	1.49642	0.007961	µm	RGB
Live	2.8215e+06	0	0	0	N/A	160886	559.445	164	1023	1.75986e+09	205.074	4.02756	2266.52	702.576	528.667	837.333	31135340	57.4073	1.52372	0.014088	µm	RGB
Live	2.83493e+06	0	0	0	N/A	160886	554.505	188.333	1023	1.74432e+09	181.915	3.56446	1936.74	700.229	525.333	838	2.65163e+07	52.2216	1.50725	0.012038	µm	RGB
Live	2.84351e+06	0	0	0	N/A	160886	569.296	184.667	1023	1790850852	192.052	3.36513	934.102	694.738	529.333	829.333	12688696	46.6505	1.56144	0.005806	µm	RGB
Live	2.85358e+06	0	0	0	N/A	160886	543.174	200	1023	1.70868e+09	194.387	3.53979	1116.79	709.345	540	838	1.54892e+07	54.8104	1.53591	0.006941	µm	RGB
Live	2.86401e+06	0	0	0	N/A	160886	578.301	189.333	1023	1819178344	193.216	3.47959	647.284	705.844	545	837	8933160	56.9741	1.52844	0.004023	µm	RGB
db 146
Live	2.94605e+06	0	0	0	N/A	160886	554.038	100.667	1023	1.74285e+09	177.076	3.64057	2451.05	697.536	520	837.333	33428724	53.2342	1.50542	0.015235	µm	RGB
Live	2.96879e+06	0	0	0	N/A	160886	537.567	184	1023	1.69104e+09	171.062	3.4678	1835.47	715.491	576.667	835.333	25677532	44.3834	1.39866	0.011408	µm	RGB
Live	2.98073e+06	0	0	0	N/A	160886	566.905	199	1023	1.78333e+09	179.771	3.41	1040.48	707.896	601.333	834.667	14401440	36.3997	1.38769	0.006467	µm	RGB
Live	3.00198e+06	0	0	0	N/A	160886	527.182	173	1023	1.65837e+09	188.429	3.72	1213.35	720.756	595	836.667	1.70992e+07	46.4912	1.36498	0.007542	µm	RGB
Live	3.0169e+06	0	0	0	N/A	160886	531.35	164.667	1023	1671482776	214.973	5.19289	810.332	710.033	582	835.667	1.12498e+07	47.1615	1.41047	0.005037	µm	RGB
Live	3.03293e+06	0	0	0	N/A	160886	561.12	173.333	1023	1.76513e+09	169.174	3.65357	357.602	713.195	596.667	832	4.98666e+06	43.7356	1.39597	0.002223	µm	RGB
db 120
Live	3.11384e+06	0	0	0	N/A	160886	496.005	130	1023	1.5603e+09	175.958	4.91827	1524.72	696.433	527.667	836.667	2.0762e+07	54.4507	1.57875	0.009477	µm	RGB
Live	3.12503e+06	0	0	0	N/A	160886	485.423	86	1023	1527008888	143.952	4.60811	1114.54	687.672	532.333	837	1.49858e+07	45.7145	1.56015	0.006927	µm	RGB
Live	3.13324e+06	0	0	0	N/A	160886	526.867	98.3333	1023	1.65738e+09	169.636	4.39056	3848.52	694.897	519	835	5.22896e+07	52.0499	1.56767	0.023921	µm	RGB
Live	3.13994e+06	0	0	0	N/A	160886	529.356	55	1023	1665211420	166.575	4.092	2006.29	687.253	523	835.333	2.69595e+07	43.7223	1.51455	0.01247	µm	RGB
Live	3.16232e+06	0	0	0	N/A	160886	473.065	116	1023	1488133792	181.62	5.74719	2051.5	690.487	522	835.667	2.76968e+07	54.0709	1.54917	0.012751	µm	RGB
Live	3.1873e+06	0	0	0	N/A	0	0	0	0	0	0	0	0	N/A	N/A	N/A	N/A	N/A	N/A	-1.#IND00	µm	RGB
db 119
Live	3.25069e+06	0	0	0	N/A	160886	557.253	81.3333	1023	1.75297e+09	248.4	5.62088	3858.33	693.082	521.333	837.333	52286084	58.4328	1.52661	0.023982	µm	RGB
Live	3.27232e+06	0	0	0	N/A	160886	465.248	73	1023	1.46354e+09	154.271	5.5	1842.22	686.947	527	836.333	2.47438e+07	52.0783	1.54461	0.01145	µm	RGB
Live	3.27828e+06	0	0	0	N/A	160886	512.521	122.667	1023	1612250496	200.533	5.32812	4017.7	694.097	524.667	838	5.45255e+07	58.4638	1.54159	0.024972	µm	RGB
Live	3.29021e+06	0	0	0	N/A	160886	454.139	93.3333	1023	1428597412	221.327	6.55769	8866.4	663.157	510.333	837	114964848	70.092	1.61315	0.05511	µm	RGB
Live	3.30999e+06	0	0	0	N/A	160886	490.601	105	1023	1.5433e+09	214.22	5.2732	3390.26	697.021	520.333	837.333	4.62041e+07	59.8843	1.56075	0.021072	µm	RGB
Live	3.32266e+06	0	0	0	N/A	160886	449.87	89.3333	1023	1.41517e+09	233.403	6.64286	4539.37	685.474	515.333	837.667	6.08399e+07	63.0071	1.58333	0.028215	µm	RGB
db 117
Live	3.39163e+06	0	0	0	N/A	160886	438.785	93	1023	1380296772	247.518	7.20423	4281.2	681.354	510.667	837	5.70348e+07	67.8196	1.61122	0.02661	µm	RGB
Live	3.40768e+06	0	0	0	N/A	160886	441.987	45.6667	1023	1.39037e+09	154.386	5.08955	3685.67	687.969	513.667	837.333	4.95778e+07	56.8986	1.5591	0.022909	µm	RGB
Live	3.41662e+06	0	0	0	N/A	160886	457.828	23.3333	1023	1440201340	189.2	29.2286	4756.43	693.332	510	837.333	64479896	57.0395	1.53604	0.029564	µm	RGB
Live	3.436e+06	0	0	0	N/A	160886	433.206	75.6667	1023	1.36275e+09	156.905	5.30052	2042.91	689.735	523.667	837.667	27550788	51.1801	1.51737	0.012698	µm	RGB
Live	3.45726e+06	0	0	0	N/A	160886	464.195	84	1023	1460230688	223.349	7.25532	4708.36	692.638	513.333	836.667	6.37643e+07	63.4818	1.54546	0.029265	µm	RGB
Live	3.47852e+06	0	0	0	N/A	160886	512.744	86.3333	1023	1.61295e+09	277.124	5.94767	1713.95	694.349	523	837.667	2.3269e+07	58.403	1.56686	0.010653	µm	RGB
db 116
Live	3.60082e+06	0	0	0	N/A	160886	470.566	68.6667	1023	1480271396	178.879	5.06436	1243.83	694.519	527.333	835	1.68907e+07	50.7613	1.57875	0.007731	µm	RGB
Live	3.60679e+06	0	0	0	N/A	160886	475.866	98	1023	1496943872	160.432	4.80282	2271.22	692.38	525.333	837	30747212	55.9513	1.50814	0.014117	µm	RGB
Live	3.6176e+06	0	0	0	N/A	160886	503.322	110.667	1023	1583314508	218.992	5.71508	4084.39	696.539	525.333	837.333	55625572	62.1342	1.57467	0.025387	µm	RGB
Live	3.62506e+06	0	0	0	N/A	160886	492.462	127	1023	1.54915e+09	188.757	5.16667	3098.74	698.445	537.667	837	4.23174e+07	59.615	1.54159	0.01926	µm	RGB
Live	3.64631e+06	0	0	0	N/A	160886	436.253	109.333	1023	1.37233e+09	166.693	5.59016	2249.33	687.157	528.667	836.333	30221164	53.9996	1.57089	0.013981	µm	RGB
Live	3.66459e+06	0	0	0	N/A	160886	440.399	73.3333	1023	1385376792	156.757	5.30052	2376.78	691.474	518.667	835.333	3.21342e+07	58.0424	1.55307	0.014773	µm	RGB
db 115
Live	3.72723e+06	0	0	0	N/A	160886	474.672	102	1023	1.49319e+09	203.449	5.98246	1043.35	710.3	588.667	835.667	1.44901e+07	44.4936	1.42007	0.006485	µm	RGB
Live	3.74214e+06	0	0	0	N/A	160886	476.509	91	1023	1.49897e+09	233.211	5.74719	2045.57	717.669	584.333	838	2.87039e+07	47.6031	1.40336	0.012714	µm	RGB
Live	3.75369e+06	0	0	0	N/A	160886	493.964	146.667	1023	1.55387e+09	216.495	4.80282	736.275	710.499	591.333	833.333	1.02283e+07	38.1002	1.40948	0.004576	µm	RGB
Live	3.76674e+06	0	0	0	N/A	160886	443.005	97.3333	1023	1.39357e+09	226.366	6.55769	886.844	713.491	594.333	836.333	1.23719e+07	45.1604	1.37459	0.005512	µm	RGB
Live	3.77757e+06	0	0	0	N/A	160886	470.264	74.6667	1023	1.47932e+09	205.968	5.5	2410.33	719.034	575	837	33886636	47.9422	1.38833	0.014982	µm	RGB
Live	3.79024e+06	0	0	0	N/A	160886	402.646	58.6667	1023	1266616024	161.061	6.77483	595.321	708.499	582.667	833.667	8.24692e+06	44.9126	1.43127	0.0037	µm	RGB
db 109
Live	3.85773e+06	0	0	0	N/A	160886	482.778	143.333	1023	1.51869e+09	186.267	4.62896	1239.95	713.878	598.333	837	1.73073e+07	45.3339	1.37232	0.007707	µm	RGB
Live	3.87563e+06	0	0	0	N/A	160886	528.357	164.667	1023	1.66207e+09	225.112	4.58744	1379.06	715.255	599	838	1.92861e+07	45.5273	1.37789	0.008572	µm	RGB
Live	3.88906e+06	0	0	0	N/A	160886	509.68	156	1023	1.60332e+09	223.514	4.67123	1130.09	713.39	593.667	837	1.57631e+07	45.6209	1.40809	0.007024	µm	RGB
Live	3.89651e+06	0	0	0	N/A	160886	454.978	130	1023	1.43124e+09	211.026	5.65193	677.97	712.054	567.667	837.667	9.43899e+06	47.2246	1.47619	0.004214	µm	RGB
Live	3.90919e+06	0	0	0	N/A	160886	452.721	147	1023	1424136136	194.518	4.87143	844.497	715.123	603	835.333	11808108	44.4852	1.38474	0.005249	µm	RGB
Live	3.92411e+06	0	0	0	N/A	160886	459.283	139.667	1023	1444780132	173.757	4.82547	1067.28	711.966	590	836	1.48573e+07	44.9132	1.41047	0.006634	µm	RGB
db 108
Live	3.97668e+06	0	0	0	N/A	160886	480.471	76.6667	1023	1.51143e+09	241.917	6.51592	1165.68	718.115	574.333	836.333	1.63673e+07	50.6108	1.45645	0.007245	µm	RGB
Live	3.99755e+06	0	0	0	N/A	160886	422.706	28.6667	1023	1.32972e+09	149.792	7.69173	1087.13	702.753	583.333	832.667	14937712	42.9521	1.40304	0.006757	µm	RGB
Live	4.00428e+06	0	0	0	N/A	160886	490.997	68.6667	1023	1544544016	210.892	5.87931	866.386	707.247	569.333	837.333	1.19808e+07	44.2188	1.46221	0.005385	µm	RGB
Live	4.01546e+06	0	0	0	N/A	160886	493.326	76.6667	1023	1.55187e+09	234.411	5.52973	1537.4	724.054	586.667	837.667	2.1765e+07	48.4684	1.41455	0.009556	µm	RGB
Live	4.03224e+06	0	0	0	N/A	160886	494.755	72.6667	1023	1556366228	318.006	9.0531	769.212	720.425	595.333	834.333	10835192	48.7671	1.40168	0.004781	µm	RGB
Live	4.05125e+06	0	0	0	N/A	160886	477.735	104	1023	1.50282e+09	258.607	7.15385	801.535	720.182	592.667	835.667	11286688	45.8852	1.41047	0.004982	µm	RGB
db 107
Live	4.13031e+06	0	0	0	N/A	160886	485.904	129	1023	1.52852e+09	222.553	5.06436	613.733	712.115	597.333	831.333	8545380	44.0274	1.39196	0.003815	µm	RGB
Live	4.14112e+06	0	0	0	N/A	160886	459.229	100.667	1023	1.44461e+09	212.498	6.31482	424.294	710.769	589.333	837	5.89654e+06	44.0239	1.42105	0.002637	µm	RGB
Live	4.15342e+06	0	0	0	N/A	160886	463.137	87.3333	1023	1.4569e+09	202.152	6.43396	844.906	689.026	534.333	836	11382716	53.9499	1.52277	0.005252	µm	RGB
Live	4.15939e+06	0	0	0	N/A	160886	453.473	81.3333	1023	1426503584	202.138	6.01765	477.689	683.757	529.333	835.667	6.38629e+06	48.0812	1.57845	0.002969	µm	RGB
Live	4.16908e+06	0	0	0	N/A	160886	409.745	77.6667	1023	1.28895e+09	228.534	10.4388	650.148	686.152	547.333	836	8.72236e+06	52.4666	1.52834	0.004041	µm	RGB
Live	4.18736e+06	0	0	0	N/A	160886	467.037	124	1023	1.46917e+09	170.064	5.2732	977.881	684.662	534.333	836.667	13090728	51.4075	1.56554	0.006078	µm	RGB
DBc SHAM
dbc 165
Live	6.87057e+06	0	0	0	N/A	160886	450.449	64.3333	1023	1.41699e+09	168.752	4.75814	778.009	687.191	534	835	1.04535e+07	52.7088	1.55993	0.004836	µm	RGB	0.00442483
Live	6.94926e+06	0	0	0	N/A	160886	496.142	74	1023	1.56073e+09	194.144	4.60811	825.675	690.9	542.333	833.333	1.11539e+07	51.5777	1.5369	0.005132	µm	RGB
Live	6.96081e+06	0	0	0	N/A	160886	451.814	71	1023	1.42128e+09	167.365	5.06436	511.853	687.158	558.667	830.667	6.87707e+06	50.5527	1.46127	0.003181	µm	RGB
Live	6.97945e+06	0	0	0	N/A	160886	465.56	79.6667	1023	1464524188	161.692	4.75814	511.853	682.116	539.667	830	6.82661e+06	48.2594	1.53989	0.003181	µm	RGB
Live	6.9966e+06	0	0	0	N/A	160886	512.385	90	1023	1611824008	249.854	4.91827	681.244	689.296	522.333	835	9.18142e+06	59.4904	1.59579	0.004234	µm	RGB
Live	7.00928e+06	0	0	0	N/A	160886	433.464	73.6667	1023	1.36356e+09	196.407	5.08955	962.947	693.435	523	835.333	13056000	55.1718	1.54749	0.005985	µm	RGB
dbc 164
Live	7.18155e+06	0	0	0	N/A	160886	447.794	37.3333	1023	1.40864e+09	228.703	20.0588	1675.29	692.153	519.667	835.333	2.26722e+07	60.0745	1.60116	0.010413	µm	RGB	0.0131083
Live	7.33145e+06	0	0	0	N/A	160886	447.729	66	1023	1.40843e+09	199.458	5.98246	2484.19	697.751	528	835.667	3.38912e+07	58.5136	1.51268	0.015441	µm	RGB
Live	7.3404e+06	0	0	0	N/A	160886	432.117	69	1023	1.35932e+09	223.709	7.00685	2904.59	694.782	523.667	835.333	3.94581e+07	61.0033	1.54259	0.018054	µm	RGB
Live	7.35756e+06	0	0	0	N/A	160886	421.752	80.3333	1023	1.32672e+09	186.675	6.05325	2394.58	692.862	531	836	3.24398e+07	59.1432	1.54935	0.014884	µm	RGB
Live	7.38104e+06	0	0	0	N/A	160886	492.288	62.6667	1023	1.5486e+09	273.183	7.00685	1948.4	690.702	528.333	834.333	2.6313e+07	60.4312	1.57467	0.01211	µm	RGB
Live	7.3885e+06	0	0	0	N/A	160886	400.402	89.3333	1023	1.25956e+09	218.893	9.38532	1246.49	692.032	518	838	16866216	56.4137	1.61004	0.007748	µm	RGB
dbc 163
Live	7.48469e+06	0	0	0	N/A	160886	510.614	137.667	1023	1606251604	216.284	5.06436	1312.77	690.508	534.333	834	1.7724e+07	53.9846	1.55618	0.00816	µm	RGB	0.00812333
Live	7.50557e+06	0	0	0	N/A	160886	470.182	135	1023	1479063224	188.838	4.94203	713.976	688.779	538.667	837	9.61536e+06	50.0304	1.55576	0.004438	µm	RGB
Live	7.51528e+06	0	0	0	N/A	160886	539.848	135	1023	1.69821e+09	237.299	4.80282	1735.84	692.528	521.667	836.667	2.35044e+07	56.5027	1.52941	0.010789	µm	RGB
Live	7.52796e+06	0	0	0	N/A	160886	500.975	121.333	1023	1.57593e+09	211.896	5.03941	2595.27	692.79	516	838	3.51549e+07	55.8309	1.54344	0.016131	µm	RGB
Live	7.53727e+06	0	0	0	N/A	160886	439.75	68.3333	1023	1.38333e+09	145.819	5.30052	922.645	686.296	547	835.667	1.23808e+07	52.027	1.5192	0.005735	µm	RGB
Live	7.54883e+06	0	0	0	N/A	160886	498.79	121	1023	1.56906e+09	204.523	4.94203	560.952	687.007	544.333	835.667	7.53509e+06	50.5548	1.53493	0.003487	µm	RGB
dbc 162
Live	7.60328e+06	0	0	0	N/A	160886	490.272	79.6667	1023	1.54226e+09	201.406	5.2732	2717.41	692.817	520	837.333	3.68107e+07	56.643	1.55805	0.01689	µm	RGB	0.0159135
Live	7.61297e+06	0	0	0	N/A	160886	494.04	86.3333	1023	1554114596	202.125	5.115	2724.16	690.768	524.333	837.333	36793052	55.2814	1.54259	0.016932	µm	RGB
Live	7.62341e+06	0	0	0	N/A	160886	501.939	78.3333	1023	1.57896e+09	207.328	4.91827	2650.71	698.315	533.667	837	36192272	58.4995	1.52834	0.016476	µm	RGB
Live	7.63459e+06	0	0	0	N/A	160886	469.02	89.6667	1023	1.47541e+09	179.024	5.16667	3156.02	696.457	531	836.667	42976972	59.264	1.53028	0.019616	µm	RGB
Live	7.6428e+06	0	0	0	N/A	160886	456.025	67.6667	1023	1.43453e+09	163.368	5.74719	2733.98	690.819	527	838	36928428	55.3335	1.52941	0.016993	µm	RGB
Live	7.6536e+06	0	0	0	N/A	160886	437.525	62.3333	1023	1.37633e+09	130.89	6.16463	1379.47	683.757	519.667	835.333	1.84423e+07	51.3409	1.54089	0.008574	µm	RGB
dbc 161
Live	7.74645e+06	0	0	0	N/A	160886	502.174	138.333	1023	1.5797e+09	131.711	4.56696	1328.53	685.022	539.667	831.333	1.77941e+07	48.1128	1.50544	0.008258	µm	RGB	0.01403
Live	7.75503e+06	0	0	0	N/A	160886	492.833	135.333	1023	1550319948	145.164	5.32812	2046.8	688.01	523	838	2.75342e+07	50.8581	1.52941	0.012722	µm	RGB
Live	7.76398e+06	0	0	0	N/A	160886	528.326	96	1023	1661971180	214.413	5.2732	1420.38	692.538	532.667	837	1.92332e+07	53.4322	1.55205	0.008828	µm	RGB
Live	7.7733e+06	0	0	0	N/A	160886	511.83	66	1023	1.61008e+09	182.105	5.21939	2725.59	689.858	523.667	835.667	3.67639e+07	53.8666	1.54749	0.016941	µm	RGB
Live	7.78524e+06	0	0	0	N/A	160886	498.84	119.667	1023	1.56922e+09	168.575	4.69266	1405.24	692.509	520.333	835	19027388	52.9874	1.6	0.008734	µm	RGB
Live	7.80164e+06	0	0	0	N/A	160886	495.62	116	1023	1559086424	235.961	5.55978	4616.91	683.154	514.667	836.333	61669660	64.933	1.5977	0.028697	µm	RGB
dbc 145
Live	7.85794e+06	0	0	0	N/A	160886	508.616	160.667	1023	1599966148	200.582	4.28034	1259.99	697.19	525	835.667	1.7176e+07	57.7568	1.58667	0.007832	µm	RGB	0.00849317
Live	7.86765e+06	0	0	0	N/A	160886	532.899	112	1023	1676354052	225.918	4.75814	1542.31	697.43	534.333	837	2.10317e+07	57.5049	1.55307	0.009586	µm	RGB
Live	7.87435e+06	0	0	0	N/A	160886	549.238	167.333	1023	1.72775e+09	237.454	4.17551	1847.54	696.946	532.667	836.667	2.51765e+07	55.2915	1.51818	0.011484	µm	RGB
Live	7.88218e+06	0	0	0	N/A	160886	557.975	149.333	1023	1.75524e+09	210.105	3.80297	1439.61	697.931	530	837.333	1.96454e+07	55.7139	1.57359	0.008948	µm	RGB
Live	7.8889e+06	0	0	0	N/A	160886	568.034	158.667	1023	1786881220	213.754	4.05952	1376.6	696.041	532	836.333	1.87346e+07	56.2416	1.53875	0.008556	µm	RGB
Live	7.90232e+06	0	0	0	N/A	160886	535.605	140.667	1023	1.68487e+09	144.806	4.02756	732.593	685.737	543	837.667	9822500	46.4103	1.52855	0.004553	µm	RGB
dbc 144
Live	7.99777e+06	0	0	0	N/A	160886	733.767	120.333	1023	2308230916	322.796	5.5	6446.86	661.069	510.333	838	8.3329e+07	77.5917	1.62136	0.040071	µm	RGB	0.012988
Live	8.03021e+06	0	0	0	N/A	160886	559.083	167.667	1023	1758723088	188.265	3.90458	785.374	687.323	541.333	835.667	10554532	50.0591	1.53789	0.004882	µm	RGB
Live	8.04401e+06	0	0	0	N/A	160886	589.456	162.667	1023	1854267736	194.216	3.88973	1094.49	698.564	528.667	836	1.49493e+07	55.1095	1.57576	0.006803	µm	RGB
Live	8.06675e+06	0	0	0	N/A	160886	566.67	142.333	1023	1782588256	179.972	3.98055	1606.34	694.772	533	833.667	2.18214e+07	53.9376	1.49551	0.009984	µm	RGB
Live	8.09099e+06	0	0	0	N/A	160886	584.096	178.667	1023	1.83741e+09	235.615	4.52655	1576.27	653.685	508.667	832.667	20146560	73.4069	1.60735	0.009797	µm	RGB
Live	8.0992e+06	0	0	0	N/A	160886	561.913	151.667	1023	1.76763e+09	199.632	4.37179	1028.21	691.596	536.667	836	1.39038e+07	52.3898	1.55037	0.006391	µm	RGB
dbc 143
Live	8.35164e+06	0	0	0	N/A	160886	528.394	129.667	1023	1.66218e+09	226.959	5.19289	2801.08	696.839	528	837	3.81645e+07	60.1455	1.53493	0.01741	µm	RGB	0.0161418
Live	8.36505e+06	0	0	0	N/A	160886	532.547	121.333	1023	1.67525e+09	247.889	5.74719	2637.01	693.36	516.333	838	3.57496e+07	58.2178	1.56874	0.01639	µm	RGB
Live	8.37662e+06	0	0	0	N/A	160886	499.836	126.667	1023	1572348204	225.713	4.80282	2439.38	695.553	522.333	837.333	33175104	57.2034	1.56367	0.015162	µm	RGB
Live	8.3949e+06	0	0	0	N/A	160886	478.875	134.333	1023	1506410936	212.366	4.96602	2403.58	702.777	538.333	837.333	3.30277e+07	59.9814	1.53591	0.01494	µm	RGB
Live	8.40906e+06	0	0	0	N/A	160886	512.2	149.667	1023	1611241868	208.146	4.73611	1532.7	696.606	515.333	836.333	20875896	57.2404	1.5396	0.009527	µm	RGB
Live	8.4318e+06	0	0	0	N/A	160886	521.224	128.333	1023	1639628324	202.396	4.91827	3768.32	700.919	510.667	837.667	5.16437e+07	60.3187	1.56767	0.023422	µm	RGB
dbc 142
Live	8.48513e+06	0	0	0	N/A	160886	574.02	81.6667	1023	1805712264	303.63	8.97368	3533.26	691.99	518.333	837.333	47805412	66.1584	1.57359	0.021961	µm	RGB	0.0163532
Live	8.50227e+06	0	0	0	N/A	160886	504.69	159.667	1023	1587616552	217.014	4.52655	2941.42	693.625	513.333	838	39891764	60.937	1.58555	0.018283	µm	RGB
Live	8.51533e+06	0	0	0	N/A	160886	465.402	163.667	1023	1464027636	193.079	4.39056	2092.22	696.496	515.333	837	28492240	59.8658	1.57143	0.013004	µm	RGB
Live	8.5418e+06	0	0	0	N/A	160886	519.037	148	1023	1.63275e+09	265.475	5.01471	2581.57	699.199	526.667	838	35292756	61.9643	1.57656	0.016046	µm	RGB
Live	8.55672e+06	0	0	0	N/A	160886	541.773	121.667	1023	1.70427e+09	268.566	5.74719	1811.54	695.541	519	838	2.46361e+07	60.9507	1.56262	0.01126	µm	RGB
Live	8.56716e+06	0	0	0	N/A	160886	505.841	142.333	1023	1.59124e+09	260.324	5.01471	2826.04	698.048	514.333	835.333	3.85713e+07	63.0092	1.6	0.017565	µm	RGB
dbc 141
Live	8.65218e+06	0	0	0	N/A	160886	624.52	159.333	1023	1964569868	173.635	3.875	1880.27	761.01	653	837	2.79778e+07	35.3116	1.26859	0.011687	µm	RGB	0.00850517
Live	8.66635e+06	0	0	0	N/A	160886	571.212	191.333	1023	1796876240	191.926	3.74725	1721.32	755.066	648.333	838	2.54125e+07	32.563	1.29012	0.010699	µm	RGB
Live	8.67492e+06	0	0	0	N/A	160886	565.138	127.667	1023	1777770984	212.83	4.52655	1739.52	758.629	648.667	837	25802484	35.6608	1.27829	0.010812	µm	RGB
Live	8.68909e+06	0	0	0	N/A	160886	561.502	128.667	1023	1766332704	195.896	4.54667	887.049	757.548	651.667	838	1.31389e+07	35.2498	1.27439	0.005514	µm	RGB
Live	8.69655e+06	0	0	0	N/A	160886	613.363	191.667	1023	1929472824	156.513	3.70652	1018.59	757.976	654.333	836	15095856	34.054	1.27676	0.006331	µm	RGB
Live	8.70662e+06	0	0	0	N/A	160886	622.075	216	1023	1.95688e+09	188.513	3.31068	963.356	757.66	657.667	837.333	1.42713e+07	33.4375	1.26475	0.005988	µm	RGB
dbc 51
Live	8.79797e+06	0	0	0	N/A	160886	467.611	107.667	1023	1.47098e+09	176.229	5.44149	282.522	758.189	651.333	836.333	4.18824e+06	35.1596	1.28418	0.001756	µm	RGB	0.00990683
Live	8.81102e+06	0	0	0	N/A	160886	477.804	84.3333	1023	1.50304e+09	202.358	6.6	572.613	756.195	646.667	838	8.46636e+06	34.8816	1.29721	0.003559	µm	RGB
Live	8.8181e+06	0	0	0	N/A	160886	491.484	100.333	1023	1.54608e+09	189.484	5.2732	911.394	758.073	661.667	838	1.35089e+07	34.6134	1.25564	0.005665	µm	RGB
Live	8.84943e+06	0	0	0	N/A	160886	472.229	86.6667	1023	1485505180	197.168	6.2	2435.29	719.527	588	837	3.4261e+07	57.5661	1.41186	0.015137	µm	RGB
Live	8.85874e+06	0	0	0	N/A	160886	501.948	105.333	1023	1578993408	190.364	6.51592	4144.95	727.656	587.667	838	5.89722e+07	56.9555	1.40809	0.025763	µm	RGB
Live	8.87142e+06	0	0	0	N/A	160886	492.375	93.6667	1023	1.54888e+09	226.659	6.47468	1216.42	747.441	602.333	838	1.77771e+07	45.1643	1.38704	0.007561	µm	RGB
dbc 52
Live	8.94115e+06	0	0	0	N/A	160886	468.1	89.3333	1023	1.47251e+09	159.228	6.01765	517.786	747.325	608	836	7565916	38.6486	1.375	0.003218	µm	RGB	0.00529467
Live	8.95122e+06	0	0	0	N/A	160886	436.824	83.6667	1023	1.37413e+09	178.615	6.6	504.489	749.357	594	837	7391656	41.7906	1.40909	0.003136	µm	RGB
Live	8.97471e+06	0	0	0	N/A	160886	470.403	100.333	1023	1479761344	215.677	5.98246	1452.91	754.467	608	837	2.14329e+07	41.3185	1.37336	0.009031	µm	RGB
Live	8.98403e+06	0	0	0	N/A	160886	416.658	88.3333	1023	1.31069e+09	173.377	6.68628	852.271	753.551	605.333	836.667	1.25572e+07	41.9726	1.36275	0.005297	µm	RGB
Live	8.99373e+06	0	0	0	N/A	160886	467.1	79	1023	1.46937e+09	231.098	6.73026	1016.75	749.55	592	835.667	1.4901e+07	41.8694	1.36438	0.00632	µm	RGB
Live	9.01089e+06	0	0	0	N/A	160886	491.561	110.333	1023	1546317232	201.701	5.52973	766.757	750.714	601.667	836.333	11254700	37.9515	1.39102	0.004766	µm	RGB
dbc 53
Live	9.09702e+06	0	0	0	N/A	160886	356.545	63.6667	1023	1.12159e+09	202.352	8.31707	3332.16	723.449	576.333	838	4.71341e+07	51.9829	1.44214	0.020711	µm	RGB	0.0152632
Live	9.11753e+06	0	0	0	N/A	160886	410.268	79.3333	1023	1290591728	256.411	8.11905	2900.91	744.599	596	838	4.22337e+07	49.3846	1.39	0.018031	µm	RGB
Live	9.12572e+06	0	0	0	N/A	160886	364.851	62.3333	1023	1147722808	225.991	8.81897	1906.66	750.63	597.333	838	2.79835e+07	46.9651	1.3887	0.011851	µm	RGB
Live	9.13765e+06	0	0	0	N/A	160886	443.844	69.6667	1023	1.39621e+09	287.773	8.184	2224.37	755.896	608.667	838	3.28754e+07	42.7652	1.37049	0.013826	µm	RGB
Live	9.14773e+06	0	0	0	N/A	160886	413.372	75.6667	1023	1.30036e+09	235.002	7.75	2745.43	743.133	594.667	837	3.98914e+07	47.001	1.3711	0.017064	µm	RGB
Live	9.15705e+06	0	0	0	N/A	160886	454.901	85	1023	1430996124	272.846	6.95918	1624.35	748.338	590.333	837.333	2.37672e+07	39.0356	1.36885	0.010096	µm	RGB
dbc 54
Live	9.27899e+06	0	0	0	N/A	160886	460.906	83.6667	1023	1449884056	161.993	5.87931	492.214	748.169	594.667	847.333	7.20038e+06	41.066	1.42593	0.003059	µm	RGB	0.007875
Live	9.29092e+06	0	0	0	N/A	160886	500.048	96.3333	1023	1.57302e+09	214.886	6.05325	577.114	751.62	607	847.667	8481284	41.3813	1.39539	0.003587	µm	RGB
Live	9.29949e+06	0	0	0	N/A	160886	564.803	90	1023	1776717200	281.16	6.91216	2032.27	751.373	597	849	2.98565e+07	46.0973	1.39016	0.012632	µm	RGB
Live	9.30844e+06	0	0	0	N/A	160886	524.147	96	1023	1.64883e+09	249.058	6.01765	1815.42	750.191	592.667	846.667	26628796	45.9317	1.41374	0.011284	µm	RGB
Live	9.3185e+06	0	0	0	N/A	160886	452.674	98.3333	1023	1.42399e+09	185.043	6.08929	1898.28	748.953	609	849.333	27798140	44.5829	1.375	0.011799	µm	RGB
Live	9.33193e+06	0	0	0	N/A	160886	415.902	86.3333	1023	1308314484	173.843	6.2	786.601	745.267	596	849	1.14622e+07	41.7013	1.39868	0.004889	µm	RGB
dbc 55
Live	9.45535e+06	0	0	0	N/A	160886	354.819	69	1023	1.11616e+09	143.382	9.47222	4245.19	662.682	504.333	849	5.50053e+07	66.1636	1.6325	0.026386	µm	RGB	0.0117997
Live	9.47437e+06	0	0	0	N/A	160886	362.756	78	1023	1141131348	150.911	7.53333	1804.99	712.017	558	849	25128504	51.8906	1.50534	0.011219	µm	RGB
Live	9.48891e+06	0	0	0	N/A	160886	372.301	74.3333	1023	1.17116e+09	159.494	7.99219	1906.05	745.072	583	848	2.77674e+07	48.2958	1.45112	0.011847	µm	RGB
Live	9.50308e+06	0	0	0	N/A	160886	415.407	78	1023	1306756212	212.784	8.38525	1082.22	753.778	590	848.667	15949936	42.3049	1.4339	0.006727	µm	RGB
Live	9.50941e+06	0	0	0	N/A	160886	374.251	70	1022.33	1177291108	116.887	7.45522	640.533	736.568	601.333	847.667	9224780	43.1038	1.39933	0.003981	µm	RGB
Live	9.51576e+06	0	0	0	N/A	160886	410.079	91.3333	1023	1289995812	170.559	7.10417	1711.5	738.918	591	849	2.47271e+07	41.0533	1.42978	0.010638	µm	RGB
dbc 115
Live	9.68094e+06	0	0	0	N/A	160886	325.925	60.3333	1023	1.02527e+09	113.704	9.64423	1129.47	649.27	500.333	836	1.43385e+07	54.8789	1.666	0.00702	µm	RGB	0.0139058
Live	9.69511e+06	0	0	0	N/A	160886	357.176	75.3333	1023	1.12358e+09	114.884	7.34559	2622.69	653.129	502.333	849.333	3.34925e+07	59.5888	1.6451	0.016301	µm	RGB
Live	9.70182e+06	0	0	0	N/A	160886	361.203	42.6667	1023	1.13625e+09	122.676	8.52941	2962.9	655.125	501	846	37952692	61.8162	1.63495	0.018416	µm	RGB
Live	9.7324e+06	0	0	0	N/A	160886	360.986	44.6667	1023	1135565092	215.606	9.56075	2278.79	657.18	482.333	846	2.92813e+07	67.017	1.67928	0.014164	µm	RGB
Live	9.74881e+06	0	0	0	N/A	160886	330.668	47.6667	1023	1040192232	115.661	8.46218	2077.69	645.432	499	846.333	26220044	65.1242	1.68938	0.012914	µm	RGB
Live	9.782e+06	0	0	0	N/A	160886	325.093	39	1023	1022653380	160.66	9.93204	2352.23	661.756	486.667	847.667	30435500	71.1443	1.70303	0.01462	µm	RGB
dbc 113
Live	9.82861e+06	0	0	0	N/A	160886	551.592	39.6667	1023	1.73516e+09	372.09	17.9474	5147.58	647.052	478.667	849.333	6.51245e+07	83.6893	1.71342	0.031995	µm	RGB	0.0191437
Live	9.87111e+06	0	0	0	N/A	160886	393.778	24.6667	1023	1.23872e+09	186.594	7.69173	2296.18	705.466	545	848.333	3.16726e+07	54.7035	1.47049	0.014272	µm	RGB
Live	9.87783e+06	0	0	0	N/A	160886	432.177	63.3333	1023	1.35951e+09	243.401	7.80916	2338.73	703.649	529.667	849	3.21765e+07	54.0419	1.47038	0.014537	µm	RGB
Live	9.88602e+06	0	0	0	N/A	160886	415.189	42.3333	1023	1306071544	212.086	7.86923	4834.17	709.038	543.667	849	67018236	60.4246	1.4912	0.030047	µm	RGB
Live	9.89349e+06	0	0	0	N/A	160886	495.872	49	1023	1559878208	291.131	7.57778	2026.14	703.771	555.333	846.667	27880592	50.9059	1.52072	0.012594	µm	RGB
Live	9.91101e+06	0	0	0	N/A	160886	428.877	50	1023	1.34913e+09	255.88	8.31707	1836.9	707.22	548	845.333	2.54005e+07	54.0364	1.51892	0.011417	µm	RGB
dbc 112
Live	1.00024e+07	0	0	0	N/A	160886	436.655	77	1023	1.3736e+09	227.723	7.41304	3479.66	705.982	538.333	849	48032180	58.1503	1.50444	0.021628	µm	RGB	0.0184153
Live	1.0015e+07	0	0	0	N/A	160886	439.778	99	1023	1.38342e+09	192.464	5.91329	2253.01	709.101	547.333	845.333	31237320	52.9093	1.46609	0.014004	µm	RGB
Live	1.0021e+07	0	0	0	N/A	160886	410.818	26.3333	1023	1.29232e+09	138.253	6.05325	2023.48	700.406	557.667	847.667	2.77109e+07	50.6095	1.51071	0.012577	µm	RGB
Live	1.00292e+07	0	0	0	N/A	160886	523.626	99.6667	1023	1647186204	282.594	6.2378	3431.79	712.302	553.333	848.667	4.77954e+07	56.04	1.49206	0.021331	µm	RGB
Live	1.00378e+07	0	0	0	N/A	160886	432.63	29	1023	1.36094e+09	195.189	6.64286	3727.41	708.655	541.667	849.333	51646780	57.5853	1.46274	0.023168	µm	RGB
Live	1.00501e+07	0	0	0	N/A	160886	455.822	71.3333	1023	1.43389e+09	211.192	6.51592	2861.22	704.825	564.667	848.333	3.94307e+07	54.0011	1.45675	0.017784	µm	RGB
dbc 111
Live	1.01157e+07	0	0	0	N/A	160886	465.943	141.667	1023	1465728396	183.005	4.54667	1636.83	706.94	583.333	847.667	2.26249e+07	50.5081	1.44768	0.010174	µm	RGB	0.0157343
Live	1.01232e+07	0	0	0	N/A	160886	468.365	135.667	1023	1.47335e+09	182.527	4.50661	2802.71	710.913	564.333	849.333	3.8958e+07	52.6586	1.44615	0.01742	µm	RGB
Live	1.01325e+07	0	0	0	N/A	160886	427.733	130	1023	1.34553e+09	218.647	5.4127	3766.27	707.789	549.667	849.333	5.21216e+07	59.5727	1.51434	0.02341	µm	RGB
Live	1.01385e+07	0	0	0	N/A	160886	467.004	147	1023	1.46907e+09	173.569	4.52655	2305.59	712.019	559.333	847.667	3.20978e+07	53.2784	1.46287	0.014331	µm	RGB
Live	1.01448e+07	0	0	0	N/A	160886	397.556	100.333	1023	1.2506e+09	126.645	5.5	1445.95	691.531	574	848.667	1.9551e+07	48.0558	1.43686	0.008987	µm	RGB
Live	1.015e+07	0	0	0	N/A	160886	457.549	74	1023	1.43932e+09	219.84	5.35602	3231.3	705.181	536	848.667	4.45533e+07	58.2054	1.52899	0.020084	µm	RGB
DBC RAS
dbc 82
Live	190834	0	0	0	N/A	160886	470.706	72.3333	1023	1.48071e+09	201.321	6.31482	18779.2	702.098	549.333	849.333	2.57796e+08	65.897	1.4947	0.116723	µm	RGB	0.0959578
Live	210974	0	0	0	N/A	160886	475.087	65.3333	1023	1.49449e+09	218.945	6.55769	17926.7	705.675	543	849.333	2.47347e+08	66.4108	1.50266	0.111425	µm	RGB
Live	224023	0	0	0	N/A	160886	472.699	93	1023	1.48698e+09	241.61	7.25532	15214.4	701.518	532.333	849	208687496	67.194	1.52158	0.094566	µm	RGB
Live	259818	0	0	0	N/A	160886	466.382	67	1023	1467110200	246.212	7.41304	15787.5	701.32	532	849.333	2.16486e+08	69.8095	1.53261	0.098128	µm	RGB
Live	278089	0	0	0	N/A	160886	491.217	64	1023	1.54523e+09	267.77	8.31707	14926.4	700.828	532.333	849.333	2.04535e+08	68.7427	1.52432	0.092776	µm	RGB
Live	295613	0	0	0	N/A	160886	479.232	54	1023	1.50753e+09	247.651	7.30714	9995.66	716.624	545	849.333	1.40057e+08	66.0089	1.4912	0.062129	µm	RGB
dbc 85
Live	361244	0	0	0	N/A	160886	384.399	55.3333	1023	1.20921e+09	150.358	8.89565	2245.04	703.934	547.333	848.333	30899892	55.6732	1.49735	0.013954	µm	RGB	0.0147617
Live	372053	0	0	0	N/A	160886	372.917	58.3333	1023	1.17309e+09	186.057	8.38525	2282.68	702.005	545	846.333	3.13319e+07	55.4506	1.51075	0.014188	µm	RGB
Live	388458	0	0	0	N/A	160886	375.547	49	1023	1.18137e+09	185.563	8.38525	2336.89	701.005	540.333	849	32030336	54.7924	1.53636	0.014525	µm	RGB
Live	442153	0	0	0	N/A	160886	410.443	77.3333	1023	1.29114e+09	193.373	7.63433	2790.23	704.757	556.333	848.667	3.84487e+07	56.889	1.49734	0.017343	µm	RGB
Live	466392	0	0	0	N/A	160886	440.869	104.667	1023	1.38685e+09	234.35	6.6	2819.49	718.011	552.333	847.667	3.95825e+07	56.8643	1.46957	0.017525	µm	RGB
Live	477577	0	0	0	N/A	160886	441.174	89.6667	1023	1387811888	199.491	6.43396	1775.33	706.659	531.333	847	24529552	55.4622	1.50624	0.011035	µm	RGB
dbc 83
Live	542830	0	0	0	N/A	160886	669.564	87.6667	1023	2106266968	263.823	6.73026	34371.1	722.977	538.333	849	4.8587e+08	67.4041	1.4912	0.213636	µm	RGB	0.156596
Live	555132	0	0	0	N/A	160886	642.448	60.6667	1023	2020966232	246.503	7.05517	39667	718.591	526.333	849.333	5.5733e+08	69.6777	1.52065	0.246553	µm	RGB
Live	564830	0	0	0	N/A	160886	713.558	79	1023	2.24466e+09	302.22	6.35404	15834.7	715.242	540.333	849.333	2.21445e+08	68.4806	1.51521	0.098422	µm	RGB
Live	590928	0	0	0	N/A	160886	511.453	93	1023	1.60889e+09	260.797	5.8125	12279	690.961	541.667	849.333	165888636	65.0257	1.51799	0.076321	µm	RGB
Live	609580	0	0	0	N/A	160886	519.918	58.6667	1023	1635519084	216.293	6.91216	22543.6	710.995	537.667	849.333	3.13395e+08	67.3905	1.50266	0.140121	µm	RGB
Live	617776	0	0	0	N/A	160886	588.135	71.3333	1023	1.85011e+09	264.473	6.64286	26469.9	721.413	548	849.333	373368616	66.9442	1.4912	0.164525	µm	RGB
dbc 45
Live	741200	0	0	0	N/A	160886	482.005	55	1023	1.51626e+09	250.797	8.45454	20907.4	564.342	431.333	716.667	230698364	57.6889	1.57461	0.129951	µm	RGB	0.0288007
Live	778855	0	0	0	N/A	160886	424.979	70.3333	1023	1.33687e+09	166.644	8.184	4206.53	563.483	432	717.667	46345360	49.9978	1.57718	0.026146	µm	RGB
Live	785617	0	0	0	N/A	160886	378.039	67	1023	1.18921e+09	115.937	8.45454	1758.96	548.802	441.667	709.667	1.88744e+07	43.8357	1.58259	0.010933	µm	RGB
Live	798250	0	0	0	N/A	160886	426.053	107.333	1023	1.34025e+09	172.09	5.77966	253.472	547.81	464.333	667.333	2.71495e+06	33.8521	1.4375	0.001575	µm	RGB
Live	805711	0	0	0	N/A	160886	438.57	110.667	1023	1379620900	185.235	5.19289	355.965	559.001	466.667	715.667	3.89065e+06	43.1101	1.53434	0.002213	µm	RGB
Live	812794	0	0	0	N/A	160886	475.276	88	1023	1.49509e+09	216.305	7.30714	319.55	553.059	470.333	701	3.45551e+06	35.9345	1.49149	0.001986	µm	RGB
dbc 44
Live	965663	0	0	0	N/A	160886	505.828	126.667	1023	1591197004	149.993	5.21939	4110.58	637.747	442.333	813.333	5.1257e+07	57.6057	1.66736	0.02555	µm	RGB	0.0297672
Live	980584	0	0	0	N/A	160886	526.558	134	1023	1.65641e+09	185.836	5.06436	2648.26	633.463	458.667	813	32800736	61.8615	1.73707	0.01646	µm	RGB
Live	996243	0	0	0	N/A	160886	484.257	155.333	1023	1523340452	160.274	4.24481	803.377	624.088	486	808	9803172	53.3552	1.65574	0.004993	µm	RGB
Live	1.01191e+06	0	0	0	N/A	160886	506.535	131	1023	1.59342e+09	184.951	4.99024	5458.13	623.905	432	813.667	6.65832e+07	70.922	1.77753	0.033925	µm	RGB
Live	1.02048e+06	0	0	0	N/A	160886	542.098	80.3333	1023	1.70529e+09	265.59	6.68628	3998.88	626.5	451.667	812.667	4.89848e+07	62.6131	1.7161	0.024855	µm	RGB
Live	1.04695e+06	0	0	0	N/A	160886	563.036	109	1023	1771158528	221.544	5.55978	11715.8	635.204	447.333	813.333	1.45507e+08	61.0908	1.67917	0.07282	µm	RGB
dbc 43
Live	1.17037e+06	0	0	0	N/A	160886	617.958	68.3333	1023	1.94393e+09	268.71	6.73026	8959.07	669.444	457.333	814	117267784	68.9874	1.6701	0.055686	µm	RGB	0.0230675
Live	1.17747e+06	0	0	0	N/A	160886	512.92	129.667	1023	1.61351e+09	145.97	4.67123	1104.72	626.022	450.333	810.333	1.35221e+07	61.1031	1.79601	0.006866	µm	RGB
Live	1.18306e+06	0	0	0	N/A	160886	531.25	123	1023	1.67117e+09	197.325	5.62088	3470.46	648.512	434.667	813	4.40054e+07	66.8857	1.76419	0.021571	µm	RGB
Live	1.19238e+06	0	0	0	N/A	160886	506.621	117.667	1023	1.59369e+09	183.758	5.38421	2541.88	635.578	439.667	813.667	31588228	65.7323	1.76805	0.015799	µm	RGB
Live	1.20357e+06	0	0	0	N/A	160886	550.969	126	1023	1733200128	224.979	5.24615	4080.51	646.558	454.333	813	51584972	64.958	1.70886	0.025363	µm	RGB
Live	1.21065e+06	0	0	0	N/A	160886	511.009	131.667	1023	1607495188	181.799	5.1407	2110.83	631.105	456.667	813	2.6047e+07	61.5246	1.7265	0.01312	µm	RGB
dbc 42
Live	1.26956e+06	0	0	0	N/A	160886	568.228	138.333	1023	1.78749e+09	189.245	4.40948	2872.88	648.339	442.667	814	3.64185e+07	70.6029	1.74624	0.017857	µm	RGB	0.013257
Live	1.27777e+06	0	0	0	N/A	160886	509.55	127.667	1023	1.60291e+09	170.789	4.69266	2268.15	639.263	440	814.333	2.83501e+07	64.8485	1.78982	0.014098	µm	RGB
Live	1.28336e+06	0	0	0	N/A	160886	552.052	160	1023	1.73661e+09	161.442	4.10843	2348.96	641.205	457	812.667	2.94493e+07	68.4679	1.73448	0.0146	µm	RGB
Live	1.29083e+06	0	0	0	N/A	160886	592.42	119.333	1023	1.86359e+09	169.737	4.35319	1869.64	640.536	431.333	813.667	2.34154e+07	69.1451	1.82658	0.011621	µm	RGB
Live	1.29865e+06	0	0	0	N/A	160886	511.951	171.667	1023	1610457384	121.487	4.09312	842.246	625.497	458.667	807.667	1.03007e+07	57.7105	1.74454	0.005235	µm	RGB
Live	1.31282e+06	0	0	0	N/A	160886	597.029	92.6667	1023	1878092360	225.752	5.32812	2595.27	640.976	450	814	32525708	67.3312	1.74946	0.016131	µm	RGB
dbc 41
Live	1.76959e+06	0	0	0	N/A	160886	474.413	79	1023	1492373296	226.355	7.00685	9584.26	624.513	426.333	814.333	1.17031e+08	69.9369	1.74892	0.059572	µm	RGB	0.0561455
Live	1.80055e+06	0	0	0	N/A	160886	363.32	69.6667	1023	1.1429e+09	138.293	7.69173	2275.72	617.977	456.333	809	2.74975e+07	53.0733	1.67573	0.014145	µm	RGB
Live	1.83337e+06	0	0	0	N/A	160886	435.234	100.333	1023	1.36913e+09	216.994	6.6	7499.41	626.785	427.667	814.333	9.19067e+07	65.6272	1.72961	0.046613	µm	RGB
Live	1.84827e+06	0	0	0	N/A	160886	457.803	102.667	1023	1.44013e+09	183.212	5.84571	28671.2	627.44	442.333	814.333	351737740	75.5149	1.75271	0.178207	µm	RGB
Live	1.85759e+06	0	0	0	N/A	160886	411.649	97.3333	1023	1294935416	147.622	5.65193	3174.64	621.009	458	811.667	38547244	52.8136	1.6639	0.019732	µm	RGB
Live	1.87102e+06	0	0	0	N/A	160886	403.21	87.6667	1023	1.26839e+09	136.115	6.2	2993.18	618.72	460.333	812	3.621e+07	54.9118	1.70638	0.018604	µm	RGB
dbc 160
Live	1.94261e+06	0	0	0	N/A	160886	482.886	128.333	1023	1.51903e+09	194.655	5.21939	4335.21	634.217	460.333	813.667	5.37588e+07	66.3452	1.71398	0.026946	µm	RGB	0.0239898
Live	1.95566e+06	0	0	0	N/A	160886	499.594	122	1023	1.57159e+09	221.521	5.30052	6781.14	633.053	444.333	814.333	83935292	67.3252	1.77024	0.042149	µm	RGB
Live	1.96423e+06	0	0	0	N/A	160886	511.332	150	1023	1.60851e+09	187.889	4.46725	2935.69	629.326	460.333	812.667	3.61233e+07	62.2162	1.71459	0.018247	µm	RGB
Live	1.99667e+06	0	0	0	N/A	160886	478.54	134	1023	1.50536e+09	185.648	4.75814	4510.94	631.965	446	813.333	5.57393e+07	63.3332	1.68685	0.028038	µm	RGB
Live	2.00339e+06	0	0	0	N/A	160886	499.518	126.333	1023	1.57135e+09	207.783	5.24615	2658.49	636.583	472.667	812.333	3.30896e+07	65.7073	1.64431	0.016524	µm	RGB
Live	2.0101e+06	0	0	0	N/A	160886	522.455	142	1023	1.6435e+09	205.573	4.35319	1936.33	624.711	466.333	813.333	2.36516e+07	60.5108	1.66529	0.012035	µm	RGB
dbc 159
Live	2.0802e+06	0	0	0	N/A	160886	498.405	75	1023	1.56785e+09	283.457	8.66949	10551.5	626.722	447	814	129297808	72.6831	1.7155	0.065584	µm	RGB	0.0282487
Live	2.09289e+06	0	0	0	N/A	160886	508.146	105.333	1023	1.59849e+09	263.126	6.16265	4626.11	630.799	454.333	812.333	5.7057e+07	64.9239	1.67288	0.028754	µm	RGB
Live	2.10071e+06	0	0	0	N/A	160886	427.506	92.3333	1023	1344816172	204.292	7.00685	2896.62	629.447	470	813.667	3.56494e+07	62.9259	1.68191	0.018004	µm	RGB
Live	2.10742e+06	0	0	0	N/A	160886	464.939	101.667	1023	1462570292	231.675	7.52206	1278.41	620.262	479	813	1.55041e+07	56.6051	1.68476	0.007946	µm	RGB
Live	2.11487e+06	0	0	0	N/A	160886	446.872	109.667	1023	1405737528	205.379	6.05325	2448.79	624.665	462.333	813.667	2.9909e+07	60.8856	1.70253	0.015221	µm	RGB
Live	2.12196e+06	0	0	0	N/A	160886	500.906	93.3333	1023	1.57571e+09	260.748	6.55769	5467.34	635.337	446.667	813.667	6.79175e+07	70.9822	1.72399	0.033983	µm	RGB
dbc 158
Live	2.15776e+06	0	0	0	N/A	160886	585.823	123	1023	1.84284e+09	227.649	5.1407	18033.3	624.81	447.667	814.333	2.20305e+08	63.2591	1.72436	0.112087	µm	RGB	0.136333
Live	2.16559e+06	0	0	0	N/A	160886	496.484	137.333	1023	1.5618e+09	162.551	5.19289	9912.61	621.937	439	811.667	120541388	53.4623	1.65298	0.061612	µm	RGB
Live	2.17603e+06	0	0	0	N/A	160886	570.533	108.333	1023	1794740092	197.281	4.75814	24646.5	626.664	454.667	814	3.01989e+08	60.8323	1.68333	0.153192	µm	RGB
Live	2.18163e+06	0	0	0	N/A	160886	575.502	147	1023	1.81037e+09	166.028	4.39056	33058.7	618.325	460.333	814	3.99673e+08	53.0653	1.64887	0.205479	µm	RGB
Live	2.18833e+06	0	0	0	N/A	160886	566.996	123	1023	1.78361e+09	187.157	4.87143	26317.9	624.577	445.667	813.333	3.21395e+08	56.9513	1.64959	0.163581	µm	RGB
Live	2.20772e+06	0	0	0	N/A	160886	539.108	132.333	1023	1695887684	202.88	5.06436	19635.4	621.959	462	814.333	238782568	56.5774	1.64155	0.122045	µm	RGB
dbc 157
Live	2.28567e+06	0	0	0	N/A	160886	445.202	99	1023	1.40048e+09	226.328	7.20423	4491.91	627.465	457	814	55109016	66.5703	1.69038	0.02792	µm	RGB	0.0220723
Live	2.29126e+06	0	0	0	N/A	160886	441.576	93.3333	1023	1.38908e+09	171.836	6.91216	2427.11	625.463	463	812.667	29681964	61.3171	1.64898	0.015086	µm	RGB
Live	2.29796e+06	0	0	0	N/A	160886	469.737	121.333	1023	1.47767e+09	189.706	5.65193	4920.09	628.208	453	813.667	6.04336e+07	63.8211	1.67702	0.030581	µm	RGB
Live	2.30951e+06	0	0	0	N/A	160886	447.22	91	1023	1.40683e+09	164.715	5.68333	4276.29	628.232	451.667	814.333	52527768	62.0165	1.72495	0.02658	µm	RGB
Live	2.3166e+06	0	0	0	N/A	160886	448.054	92.6667	1023	1.40945e+09	203.617	6.86577	2315.21	620.26	449	814	2.80779e+07	57.6625	1.68894	0.01439	µm	RGB
Live	2.32406e+06	0	0	0	N/A	160886	440.8	130.667	1023	1.38664e+09	138.581	4.99024	2876.16	629.916	457.333	813.333	3.5424e+07	61.9638	1.69456	0.017877	µm	RGB
dbc 156
Live	2.71335e+06	0	0	0	N/A	160886	471.79	131.333	1023	1484123384	207.59	5.19289	3193.05	636.726	470.333	811.333	3.97521e+07	66.19	1.6303	0.019847	µm	RGB	0.0151183
Live	2.72006e+06	0	0	0	N/A	160886	443.332	66.6667	1023	1.3946e+09	170.149	5.21939	3456.34	634.767	460	813.667	42897536	66.2834	1.7155	0.021483	µm	RGB
Live	2.72714e+06	0	0	0	N/A	160886	467.02	120.333	1023	1469117108	211.478	5.4127	1692.88	624.577	478	812.333	20673484	60.5951	1.69038	0.010522	µm	RGB
Live	2.73609e+06	0	0	0	N/A	160886	466.835	141.333	1023	1.46853e+09	153.97	4.96602	1936.94	617.755	462.333	810.667	2.33956e+07	52.4537	1.65164	0.012039	µm	RGB
Live	2.7771e+06	0	0	0	N/A	160886	517.069	141.667	1023	1.62656e+09	236.325	4.78037	2472.32	627.127	485.333	812.333	3.03153e+07	61.6326	1.65041	0.015367	µm	RGB
Live	2.7868e+06	0	0	0	N/A	160886	504.116	156.667	1023	1.58581e+09	181.52	4.125	1842.43	621.656	488	813	22394552	54.6134	1.625	0.011452	µm	RGB
dbc 155
Live	2.85839e+06	0	0	0	N/A	160886	526.357	149.333	1023	1.65578e+09	145.414	4.60811	2354.48	629.81	459.333	814	28993912	64.1531	1.70825	0.014634	µm	RGB	0.0124055
Live	2.87891e+06	0	0	0	N/A	160886	526.397	77	1023	1.6559e+09	110.526	4.44783	1798.03	617.03	474.667	812.667	2.16923e+07	55.7821	1.65298	0.011176	µm	RGB
Live	2.89605e+06	0	0	0	N/A	160886	469.24	137.333	1023	1.4761e+09	147.407	4.91827	2935.69	616.089	467	811.333	3.53635e+07	61.5128	1.65773	0.018247	µm	RGB
Live	2.92066e+06	0	0	0	N/A	160886	470.152	166	1023	1.47897e+09	119.542	4.48684	1933.67	630.544	474.667	812.333	2.38396e+07	63.0382	1.65102	0.012019	µm	RGB
Live	2.92962e+06	0	0	0	N/A	160886	511.306	173.333	1023	1.60843e+09	131.23	4.46725	1972.54	614.863	492.667	810	2.3714e+07	52.2176	1.63105	0.01226	µm	RGB
Live	2.93856e+06	0	0	0	N/A	160886	486.369	164.333	1023	1.52998e+09	118.184	4.37179	980.95	608.049	489	804.333	1.16624e+07	46.0993	1.62168	0.006097	µm	RGB
dbc 154
Live	2.97326e+06	0	0	0	N/A	160886	502.333	146.333	1023	1580202144	213.305	5.5	20880.2	598.19	459.667	813.667	2.44217e+08	61.9416	1.69198	0.129782	µm	RGB	0.0687493
Live	2.98667e+06	0	0	0	N/A	160886	442.171	126	1023	1390950524	187.291	5.94767	12038.8	607.507	454	813.333	1.43e+08	64.5109	1.71277	0.074828	µm	RGB
Live	2.99561e+06	0	0	0	N/A	160886	443.659	126.333	1023	1.39563e+09	186.653	5.8125	3514.03	614.05	479.333	812.333	4.21902e+07	53.592	1.64008	0.021842	µm	RGB
Live	3.00232e+06	0	0	0	N/A	160886	454.54	203.667	1023	1.42986e+09	156.274	4.10843	2193.07	614.394	500.333	808.333	2.63452e+07	48.2523	1.586	0.013631	µm	RGB
Live	3.0094e+06	0	0	0	N/A	160886	460.64	130	1023	1449049412	160.392	6.16265	19056.8	621.147	468	812.333	231444284	61.0679	1.65092	0.118449	µm	RGB
Live	3.03737e+06	0	0	0	N/A	160886	444.522	122.333	1023	1.39834e+09	225.352	5.91329	8682.07	603.373	458.667	813.667	1.02426e+08	59.8802	1.71489	0.053964	µm	RGB
dbc 153
Live	3.09144e+06	0	0	0	N/A	160886	493.882	155.333	1023	1.55362e+09	153.007	4.26582	21637.4	614.52	476.333	813.667	2.59981e+08	50.6146	1.6146	0.134488	µm	RGB	0.0433458
Live	3.10822e+06	0	0	0	N/A	160886	431.272	135.333	1023	1.35666e+09	144.114	6.01765	6113.6	613.821	473.667	814.333	7.33737e+07	52.2392	1.61895	0.037999	µm	RGB
Live	3.11716e+06	0	0	0	N/A	160886	517.637	118.667	1023	1.62834e+09	226.082	6.86577	2224.99	617.834	481.333	811.667	26878248	52.5159	1.60279	0.01383	µm	RGB
Live	3.12836e+06	0	0	0	N/A	160886	495.772	188.667	1023	1.55957e+09	164.673	3.98055	2033.3	633.107	486	813.667	25169800	61.9799	1.59289	0.012638	µm	RGB
Live	3.13991e+06	0	0	0	N/A	160886	526.49	111.667	1023	1.65619e+09	224.76	4.69266	3664.19	634.103	458.333	814.333	4.54297e+07	70.0547	1.7382	0.022775	µm	RGB
Live	3.15408e+06	0	0	0	N/A	160886	494.513	164	1023	1.5556e+09	150.127	4.19262	6169.24	626.402	464.667	813.333	75559156	56.6235	1.65235	0.038345	µm	RGB
dbc 152
Live	3.19659e+06	0	0	0	N/A	160886	519.364	129.333	1023	1.63378e+09	162.443	5.01471	22493.3	610.008	471	813	2.68282e+08	46.2453	1.61492	0.139809	µm	RGB	0.0777027
Live	3.20294e+06	0	0	0	N/A	160886	567.035	154.333	1023	1.78374e+09	203.47	4.82547	14693.2	611.102	481	812.667	175562200	44.9109	1.58052	0.091326	µm	RGB
Live	3.21151e+06	0	0	0	N/A	160886	519.582	137.333	1023	1634462688	216.35	4.87143	7419.42	612.636	459.333	811.667	88873844	51.9868	1.64622	0.046116	µm	RGB
Live	3.22978e+06	0	0	0	N/A	160886	548.048	147.333	1023	1.72401e+09	153.402	3.72	9094.91	618.064	483.333	813	1.09909e+08	48.858	1.59208	0.05653	µm	RGB
Live	3.23723e+06	0	0	0	N/A	160886	522.265	110	1023	1642903676	155.534	4.71429	9283.33	617.097	477.333	811.667	1.12011e+08	47.3763	1.5858	0.057701	µm	RGB
Live	3.24283e+06	0	0	0	N/A	160886	471.873	126	1023	1.48438e+09	139.362	4.48684	12023.6	607.632	480.667	807.667	1.42849e+08	39.6911	1.53267	0.074734	µm	RGB
dbc 150
Live	3.31628e+06	0	0	0	N/A	160886	498.248	163	1023	1.56735e+09	129.333	3.70652	3161.54	617.501	476	814.333	38171468	52.578	1.63821	0.019651	µm	RGB	0.0297047
Live	3.32412e+06	0	0	0	N/A	160886	515.822	105.667	1023	1622635744	150.735	4.22727	6544.03	627.693	473	813.667	80314568	61.0495	1.64359	0.040675	µm	RGB
Live	3.33419e+06	0	0	0	N/A	160886	450.615	173	1023	1.41751e+09	178.129	4.10843	4633.68	634.022	470	812.667	57442392	63.8222	1.66598	0.028801	µm	RGB
Live	3.345e+06	0	0	0	N/A	160886	485.38	187	1023	1.52687e+09	119.682	3.58214	5764.39	623.764	455.667	814	70303152	55.4526	1.66049	0.035829	µm	RGB
Live	3.35693e+06	0	0	0	N/A	160886	490.305	145.333	1023	1.54237e+09	234.244	4.44783	5430.72	635.563	444.667	814.333	6.74866e+07	68.6787	1.69958	0.033755	µm	RGB
Live	3.37147e+06	0	0	0	N/A	160886	550.637	102.333	1023	1732153144	269.024	4.89474	3140.06	626.194	480.333	814	38445800	60.4471	1.62903	0.019517	µm	RGB
dbc 147
Live	3.47028e+06	0	0	0	N/A	160886	456.796	106	1023	1.43696e+09	225.893	5.52973	19060.3	602.624	450.667	813.333	2.24584e+08	75.9562	1.74298	0.118471	µm	RGB	0.073909
Live	3.47811e+06	0	0	0	N/A	160886	455.141	69	1023	1.43175e+09	253.629	8.05512	14034.4	631.062	430	814	173168568	80.8467	1.76139	0.087232	µm	RGB
Live	3.48483e+06	0	0	0	N/A	160886	408.968	101.333	1023	1286501452	166.385	6.01765	15102.9	609.259	447	814.333	1.79914e+08	74.5175	1.72805	0.093873	µm	RGB
Live	3.49154e+06	0	0	0	N/A	160886	383.107	69.3333	1023	1.20515e+09	152.354	6.95918	12922.6	603.051	437	813.667	1.52372e+08	76.7756	1.76253	0.080321	µm	RGB
Live	3.50048e+06	0	0	0	N/A	160886	408.485	120.667	1023	1.28498e+09	136.701	5.77966	4577.02	619.056	475.667	814.333	55400564	62.7178	1.64228	0.028449	µm	RGB
Live	3.51316e+06	0	0	0	N/A	160886	409.358	96.6667	1023	1.28773e+09	133.169	5.115	5648.39	620.445	459	813.667	6.85219e+07	65.6038	1.69038	0.035108	µm	RGB
dbc 146
Live	3.56201e+06	0	0	0	N/A	160886	541.842	181.667	1023	1704486292	126.636	3.50343	27787.6	619.404	476	810.667	336531968	50.1654	1.58084	0.172716	µm	RGB	0.158827
Live	3.57096e+06	0	0	0	N/A	160886	576.156	182	1023	1.81243e+09	200.112	4.65	33550.7	618.281	449.667	813.667	4.05592e+08	57.2637	1.67573	0.208537	µm	RGB
Live	3.57954e+06	0	0	0	N/A	160886	532.035	184.667	1023	1673638564	183.429	3.875	6092.94	635.983	473.667	813.667	7.5766e+07	64.7199	1.64431	0.037871	µm	RGB
Live	3.59146e+06	0	0	0	N/A	160886	572.187	151.333	1023	1799945928	160.257	4.04348	36900.3	631.74	466.333	814	455795388	59.1211	1.61771	0.229356	µm	RGB
Live	3.5993e+06	0	0	0	N/A	160886	641.234	176	1023	2017148104	158.487	3.55208	34281.9	640.863	480.667	814	4.29568e+08	56.7595	1.60359	0.213081	µm	RGB
Live	3.60564e+06	0	0	0	N/A	160886	556.373	150.667	1023	1.7502e+09	166.079	3.62766	14705	636.687	466.333	814.333	1.8306e+08	59.4537	1.63489	0.0914	µm	RGB
dbc 140
Live	3.67313e+06	0	0	0	N/A	160886	427.801	24.3333	1023	1.34574e+09	224	29.2286	3626.34	624.267	436	814	4.4263e+07	66.4079	1.71036	0.02254	µm	RGB	0.0215703
Live	3.67946e+06	0	0	0	N/A	160886	421.888	30.3333	1023	1327144656	209.602	7.57778	2838.31	632.839	471	813	35120048	68.4567	1.67909	0.017642	µm	RGB
Live	3.68655e+06	0	0	0	N/A	160886	470.125	54	1023	1.47889e+09	227.608	6.43396	3747.86	629.981	459.333	814.333	46164980	65.3518	1.67842	0.023295	µm	RGB
Live	3.69252e+06	0	0	0	N/A	160886	456.183	44	1023	1.43503e+09	225.983	5.94767	4865.47	630.243	466	812.667	59956264	66.1167	1.69958	0.030242	µm	RGB
Live	3.69811e+06	0	0	0	N/A	160886	434.555	150.333	1023	1.36699e+09	183.402	5.01471	2877.59	630.177	464	813.333	3.54563e+07	60.2959	1.63563	0.017886	µm	RGB
Live	3.7037e+06	0	0	0	N/A	160886	434.663	130.333	1023	1.36733e+09	217.819	5.5	2866.54	634.677	459	813	35572360	63.5733	1.69748	0.017817	µm	RGB
dbc 139
Live	3.75479e+06	0	0	0	N/A	160886	562.878	96.3333	1023	1.77066e+09	282.044	6.35404	2711.68	626.42	471.333	812.667	3.32128e+07	65.9079	1.68399	0.016855	µm	RGB	0.0173785
Live	3.76187e+06	0	0	0	N/A	160886	516.732	120.667	1023	1625498640	235.675	5.91329	2263.24	635.979	465.333	813.667	2.81434e+07	66.8834	1.6551	0.014067	µm	RGB
Live	3.77007e+06	0	0	0	N/A	160886	513.947	145.333	1023	1.61674e+09	182.433	4.62896	5085.19	627.872	459.333	814.333	62428044	60.0745	1.614	0.031607	µm	RGB
Live	3.77754e+06	0	0	0	N/A	160886	528.248	148.333	1023	1661724592	211.057	4.42857	1662.19	621.91	489.667	811.667	2.02121e+07	56.0486	1.63105	0.010331	µm	RGB
Live	3.78425e+06	0	0	0	N/A	160886	498.432	136	1023	1.56793e+09	157.908	4.19262	744.458	607.077	489	812	8.83661e+06	44.1245	1.66053	0.004627	µm	RGB
Live	3.7917e+06	0	0	0	N/A	160886	558.07	141.333	1023	1755536820	209.529	4.50661	4309.22	630.236	470	814	5.31012e+07	63.1444	1.64898	0.026784	µm	RGB
dbc 138
Live	3.82563e+06	0	0	0	N/A	160886	435.445	68	1023	1369792704	193.747	9.65094	5689.92	634.991	451.333	813	70643980	70.1488	1.70464	0.035366	µm	RGB	0.0255742
Live	3.8316e+06	0	0	0	N/A	160886	482.708	138	1023	1.51847e+09	204.93	4.84834	4168.68	628.643	451.333	813	5.12394e+07	63.9016	1.66392	0.025911	µm	RGB
Live	3.83719e+06	0	0	0	N/A	160886	470.95	128.333	1023	1481479368	190.213	4.71429	3393.94	625.471	473.333	812.333	4.15063e+07	61.2804	1.64706	0.021095	µm	RGB
Live	3.84577e+06	0	0	0	N/A	160886	456.603	53	1023	1.43635e+09	258.141	6.2378	3462.48	638.44	463	813.667	43222384	69.1129	1.6544	0.021521	µm	RGB
Live	3.85173e+06	0	0	0	N/A	160886	407.794	107.333	1023	1282809812	196.574	6.16265	5118.53	627.143	459.333	813	62764488	68.7671	1.72495	0.031815	µm	RGB
Live	3.85733e+06	0	0	0	N/A	160886	425.298	130	1023	1.33787e+09	166.517	5.19289	2853.65	629.838	465.333	814	3.51424e+07	64.0084	1.7044	0.017737	µm	RGB
dbc 137
Live	3.90767e+06	0	0	0	N/A	160886	467.186	137	1023	1.46964e+09	186.897	4.99024	1629.05	618.986	465.333	810.333	19715944	55.9253	1.66322	0.010125	µm	RGB	0.0222463
Live	3.91326e+06	0	0	0	N/A	160886	460.42	138.667	1023	1.44835e+09	146.273	4.69266	2371.46	616.952	470	807.333	2.86068e+07	54.7249	1.67715	0.01474	µm	RGB
Live	3.91922e+06	0	0	0	N/A	160886	500.099	143.333	1023	1.57318e+09	188.031	4.67123	2965.35	637.182	450.333	811.667	3.69438e+07	65.1699	1.73979	0.018431	µm	RGB
Live	3.92444e+06	0	0	0	N/A	160886	470.614	142	1023	1.48042e+09	165.756	4.67123	4790.19	620.509	470.333	809.333	58116904	52.4594	1.63804	0.029774	µm	RGB
Live	3.93041e+06	0	0	0	N/A	160886	510.594	138.333	1023	1.60619e+09	199.11	4.91827	6622.59	637.496	437	813.667	8.25481e+07	68.169	1.72187	0.041163	µm	RGB
Live	3.93638e+06	0	0	0	N/A	160886	486.747	139	1023	1531173896	171.633	4.39056	3096.28	637.528	449.667	813.333	3.85959e+07	66.4087	1.68191	0.019245	µm	RGB
dbc 136
Live	3.98783e+06	0	0	0	N/A	160886	467.271	135.333	1023	1469906132	194.778	5.52973	1911.37	625.31	450	814	23369080	58.6653	1.68619	0.01188	µm	RGB	0.0186877
Live	3.99528e+06	0	0	0	N/A	160886	464.631	112	1023	1.4616e+09	209.014	5.8125	4190.57	629.398	453.333	813	5.15704e+07	65.1753	1.69247	0.026047	µm	RGB
Live	4.00126e+06	0	0	0	N/A	160886	499.019	83	1023	1.56978e+09	206.45	5.1407	3826.01	627.663	472	813.667	4.69542e+07	62.4042	1.65574	0.023781	µm	RGB
Live	4.00946e+06	0	0	0	N/A	160886	455.846	64.3333	1023	1.43397e+09	197.036	6.47468	2601.21	636.181	470	813	32356176	66.0021	1.71702	0.016168	µm	RGB
Live	4.01692e+06	0	0	0	N/A	160886	447.2	108.667	1023	1.40677e+09	174.038	5.52973	3685.06	622.149	452.333	811.333	44827104	58.1364	1.64562	0.022905	µm	RGB
Live	4.02475e+06	0	0	0	N/A	160886	449.988	78.6667	1023	1.41554e+09	143.888	5.1407	1825.24	622.805	483.333	809.667	2.22267e+07	56.2077	1.63434	0.011345	µm	RGB
dbc 125
Live	4.06913e+06	0	0	0	N/A	160886	577.003	89	1023	1.81509e+09	332.084	7.52206	4459.59	613.166	442	814	5.34656e+07	75.6103	1.76689	0.027719	µm	RGB	0.026177
Live	4.07732e+06	0	0	0	N/A	160886	523.705	82	1023	1647434604	239.753	5.4127	3221.08	631.912	443.667	813.667	3.97978e+07	64.3976	1.66461	0.020021	µm	RGB
Live	4.08441e+06	0	0	0	N/A	160886	512.644	84.3333	1023	1.61264e+09	196.612	5.06436	2475.39	619.268	447.333	813	2.99726e+07	52.7091	1.69345	0.015386	µm	RGB
Live	4.09112e+06	0	0	0	N/A	160886	515.321	118	1023	1621060072	222.12	5.21939	3228.85	626.479	441.333	812.667	39550872	61.5723	1.69538	0.020069	µm	RGB
Live	4.10158e+06	0	0	0	N/A	160886	480.14	114.333	1023	1.51039e+09	207.577	5.62088	4011.77	634.073	434.333	813.333	4.97367e+07	65.6188	1.7167	0.024935	µm	RGB
Live	4.11125e+06	0	0	0	N/A	160886	501.309	97	1023	1576983048	229.376	6.2378	7872.56	648.719	438.333	814.333	9.9856e+07	73.4617	1.70378	0.048932	µm	RGB
dbc 124
Live	4.15563e+06	0	0	0	N/A	160886	422.533	65.3333	1023	1.32917e+09	197.141	7.15385	9968.25	626.599	434.333	814	1.22127e+08	78.8015	1.77243	0.061958	µm	RGB	0.0427217
Live	4.16271e+06	0	0	0	N/A	160886	503.715	93	1023	1.58455e+09	266.951	6.73026	6475.7	637.83	444.667	813.667	8.07595e+07	74.0402	1.73979	0.04025	µm	RGB
Live	4.16831e+06	0	0	0	N/A	160886	471.169	77.6667	1023	1.48217e+09	222.45	5.91329	7592.08	632.172	445	813.667	9.38422e+07	69.4666	1.73448	0.047189	µm	RGB
Live	4.17502e+06	0	0	0	N/A	160886	428.263	94	1023	1347197728	163.449	5.55978	3893.52	625.559	458	814	4.76225e+07	60.6321	1.77293	0.0242	µm	RGB
Live	4.18023e+06	0	0	0	N/A	160886	441.283	113	1023	1388155544	151.424	5.44149	5216.53	622.086	434	813.333	6.34502e+07	59.3566	1.72591	0.032424	µm	RGB
Live	4.18546e+06	0	0	0	N/A	160886	496.146	86	1023	1.56074e+09	195.061	5.19289	8094.12	627.845	436.667	813.667	9.93628e+07	63.7535	1.73763	0.050309	µm	RGB
dbc 123
Live	4.24699e+06	0	0	0	N/A	160886	442.375	98.3333	1023	1.39159e+09	191.72	7.41304	1244.86	623.15	483.667	810	1.51675e+07	60.8773	1.65708	0.007737	µm	RGB	0.0217577
Live	4.25332e+06	0	0	0	N/A	160886	407.903	109	1023	1.28315e+09	131.052	5.87931	2310.91	617.763	457	813.333	27913008	60.5799	1.76087	0.014364	µm	RGB
Live	4.25929e+06	0	0	0	N/A	160886	462.246	54.6667	1023	1454100228	186.527	5.59016	4933.6	633.828	462.333	813.667	61141596	67.5081	1.70316	0.030665	µm	RGB
Live	4.26526e+06	0	0	0	N/A	160886	468.821	117	1023	1474784772	176.74	5.24615	2974.97	627.693	472.667	809.333	3.65116e+07	60.8419	1.68619	0.018491	µm	RGB
Live	4.27234e+06	0	0	0	N/A	160886	462.303	66	1023	1.45428e+09	203.698	8.05512	5440.74	627.892	452	814.333	66795148	66.8021	1.67635	0.033817	µm	RGB
Live	4.27756e+06	0	0	0	N/A	160886	431.13	104.333	1023	1.35622e+09	136.175	5.32812	4098.1	633.804	449.333	813.333	5.07855e+07	67.2258	1.71186	0.025472	µm	RGB
dbc 122
Live	4.32454e+06	0	0	0	N/A	160886	525.473	161	1023	1.653e+09	182.293	4.65	26906.5	646.62	454.333	814.333	3.40179e+08	72.6242	1.68542	0.167239	µm	RGB	0.0580638
Live	4.33014e+06	0	0	0	N/A	160886	532.996	135	1023	1.67666e+09	200.489	4.73611	10629.9	647.18	469.667	814.333	134509968	70.5805	1.68607	0.066071	µm	RGB
Live	4.34281e+06	0	0	0	N/A	160886	475.463	152.667	1023	1495678456	180.838	4.87143	7976.07	626.816	462.333	814.333	9.77533e+07	72.8146	1.72281	0.049576	µm	RGB
Live	4.35325e+06	0	0	0	N/A	160886	483.174	117.333	1023	1.51993e+09	189.1	4.91827	3553.72	640.538	460.667	814	4.45071e+07	67.2616	1.6404	0.022088	µm	RGB
Live	4.35884e+06	0	0	0	N/A	160886	494.821	123.667	1023	1.55657e+09	191.55	5.115	4318.63	634.282	442.333	812.667	5.35587e+07	66.0952	1.66461	0.026843	µm	RGB
Live	4.36481e+06	0	0	0	N/A	160886	539.481	133	1023	1.69706e+09	235.77	4.87143	2665.24	638.46	460	814	3.32714e+07	66.1088	1.76304	0.016566	µm	RGB
dbc 46
Live	4.39912e+06	0	0	0	N/A	160886	432.219	105	1023	1.35964e+09	160.229	5.68333	924.486	626.475	441	810.667	1.13242e+07	60.4382	1.83674	0.005746	µm	RGB	0.00393083
Live	4.40583e+06	0	0	0	N/A	160886	466.821	142.667	1023	1.46849e+09	177.799	4.87143	570.567	619.256	470	806.333	6.90842e+06	47.959	1.71489	0.003546	µm	RGB
Live	4.41105e+06	0	0	0	N/A	160886	476.141	168.667	1023	1.49781e+09	190.263	4.15854	641.146	621.952	485	801.667	7796784	53.6312	1.65155	0.003985	µm	RGB
Live	4.41664e+06	0	0	0	N/A	160886	498.999	160	1023	1.56971e+09	200.923	4.05952	596.139	615.848	476.667	803.333	7.17832e+06	49.5177	1.68698	0.003705	µm	RGB
Live	4.42223e+06	0	0	0	N/A	160886	475.08	127.333	1023	1.49447e+09	153.292	4.28034	444.343	618.56	494	809	5.37405e+06	50.8431	1.63765	0.002762	µm	RGB
Live	4.4282e+06	0	0	0	N/A	160886	480.766	103.333	1023	1.51236e+09	194.727	7.86923	618.029	617.941	478.333	813.333	7.4672e+06	51.6704	1.70084	0.003841	µm	RGB
dbc 47
Live	4.46997e+06	0	0	0	N/A	160886	461.864	91.3333	1023	1452897488	167.398	6.08929	2495.03	638.203	451.333	813.333	3.11341e+07	65.2975	1.78808	0.015508	µm	RGB	0.0236902
Live	4.47668e+06	0	0	0	N/A	160886	439.584	91.3333	1023	1.38281e+09	130.363	6.08929	1026.57	617.07	463.667	810.333	12385820	50.4277	1.74569	0.006381	µm	RGB
Live	4.48339e+06	0	0	0	N/A	160886	516.169	96.6667	1023	1623728492	209.625	5.77966	8759.2	630.425	436	814	1.07969e+08	68.2114	1.77974	0.054443	µm	RGB
Live	4.48973e+06	0	0	0	N/A	160886	515.016	91.6667	1023	1620101072	201.887	6.51592	7345.77	653.824	445.333	814.333	9.39074e+07	72.3067	1.75	0.045658	µm	RGB
Live	4.49494e+06	0	0	0	N/A	160886	462.306	80.3333	1023	1.45429e+09	196.358	6.2378	2178.55	642.773	465.667	814	2.73796e+07	65.6525	1.69748	0.013541	µm	RGB
Live	4.50464e+06	0	0	0	N/A	160886	427.75	98.3333	1023	1.34558e+09	149.569	6.2	1063.39	623.21	464.667	809.333	1.29578e+07	57.1782	1.675	0.00661	µm	RGB
dbc 48
Live	4.5464e+06	0	0	0	N/A	160886	475.185	89	1023	1.4948e+09	140.998	7.20423	8208.27	629.318	441.333	812.333	1.01e+08	60.8711	1.72068	0.051019	µm	RGB	0.0289463
Live	4.55237e+06	0	0	0	N/A	160886	473.778	85.6667	1023	1.49038e+09	205.531	6.2378	2945.71	641.606	449.667	813	36953924	66.2073	1.77024	0.018309	µm	RGB
Live	4.55946e+06	0	0	0	N/A	160886	467.587	76.3333	1023	1.4709e+09	159.127	6.35404	1482.37	624.836	445	813	18110256	59.5224	1.82247	0.009214	µm	RGB
Live	4.56952e+06	0	0	0	N/A	160886	577.37	101.667	1023	1.81625e+09	199.78	6.05325	10355.7	634.348	430	814.333	128442756	66.5168	1.75271	0.064367	µm	RGB
Live	4.58183e+06	0	0	0	N/A	160886	531.392	103	1023	1.67161e+09	187.589	6.6	3064.57	630.45	433	814	37776560	56.8401	1.76149	0.019048	µm	RGB
Live	4.58667e+06	0	0	0	N/A	160886	503.843	93	1023	1.58495e+09	212.155	7.10417	1885.8	627.544	438.667	812.667	2.31388e+07	56.2131	1.84932	0.011721	µm	RGB
dbc 49
Live	4.61351e+06	0	0	0	N/A	160886	483.198	105	1023	1.52001e+09	176.501	6.08929	2095.08	622.746	449.333	813.667	25510184	52.5026	1.68344	0.013022	µm	RGB	0.00799217
Live	4.6221e+06	0	0	0	N/A	160886	443.441	130	1023	1394945092	123.177	4.80282	462.55	619.679	497	787.333	5604380	42.9414	1.5835	0.002875	µm	RGB
Live	4.63142e+06	0	0	0	N/A	160886	443.394	151	1023	1394796636	147.622	5.03941	858.408	649.436	485.333	802	1.09001e+07	50.4828	1.65361	0.005335	µm	RGB
Live	4.63851e+06	0	0	0	N/A	160886	441.366	119.667	1023	1388417284	124.651	5.8125	698.837	620.105	465.333	810	8.47312e+06	52.8601	1.74194	0.004344	µm	RGB
Live	4.6441e+06	0	0	0	N/A	160886	482.892	114.333	1023	1.51905e+09	194.019	5.71508	1587.73	625.271	463	809.667	1.94109e+07	58.6668	1.69748	0.009869	µm	RGB
Live	4.65267e+06	0	0	0	N/A	160886	517.076	155	1023	1.62658e+09	218.448	4.91827	2012.43	622.284	466.333	812	2.44856e+07	51.3304	1.70588	0.012508	µm	RGB
dbc 50
Live	4.69295e+06	0	0	0	N/A	160886	455.45	82.3333	1023	1.43272e+09	214.858	7.30714	3961.65	627.936	445.333	813.667	4.86399e+07	62.5843	1.72805	0.024624	µm	RGB	0.0227372
Live	4.69891e+06	0	0	0	N/A	160886	464.996	66.3333	1023	1462751692	244.041	8.66949	6455.45	633.933	436	814.333	80014968	69.0957	1.78462	0.040124	µm	RGB
Live	4.70599e+06	0	0	0	N/A	160886	355.895	65.3333	1023	1119548632	115.688	7.80916	2831.76	604.517	446.667	810.667	33470916	52.4533	1.70878	0.017601	µm	RGB
Live	4.71232e+06	0	0	0	N/A	160886	386.064	74	1023	1.21445e+09	120.52	7.2971	5603.59	611.317	440.667	810.333	6.69784e+07	54.3982	1.72414	0.034829	µm	RGB
Live	4.71867e+06	0	0	0	N/A	160886	393.746	93.3333	1023	1.23862e+09	128.747	7.69173	1661.58	615.317	457.667	809.333	1.99904e+07	50.8417	1.67292	0.010328	µm	RGB
Live	4.72426e+06	0	0	0	N/A	160886	396.502	89.6667	1023	1247286740	119.715	6.95205	1434.7	614.572	463.333	807.333	1.724e+07	45.8403	1.65263	0.008917	µm	RGB
dbc 151
Live	4.78094e+06	0	0	0	N/A	160886	478.201	144.333	1023	1.50429e+09	183.192	4.73611	2137.63	628.141	480.333	814.333	26253780	60.5928	1.625	0.013287	µm	RGB	0.0230647
Live	4.78728e+06	0	0	0	N/A	160886	459.552	154	1023	1445626168	165.519	4.71429	2251.99	621.011	474	813.333	27344340	53.8833	1.64694	0.013997	µm	RGB
Live	4.7925e+06	0	0	0	N/A	160886	480.398	111.667	1023	1.5112e+09	172.84	5.19289	5338.25	618.808	466	813.333	6.45887e+07	52.8404	1.6008	0.03318	µm	RGB
Live	4.79735e+06	0	0	0	N/A	160886	419.589	73	1023	1319911504	123.384	4.73611	3566.81	611.237	485.333	813.333	4.26277e+07	47.6799	1.60362	0.02217	µm	RGB
Live	4.80592e+06	0	0	0	N/A	160886	457.756	165.667	1023	1439977000	163.539	4.87143	6114.42	620.094	488.667	813.333	74133528	54.0313	1.6012	0.038005	µm	RGB
Live	4.8171e+06	0	0	0	N/A	160886	460.446	162.333	1023	1.44844e+09	118.799	3.72863	2855.5	616.921	462.667	811.333	34443912	48.3282	1.63975	0.017749	µm	RGB
dbc 121
Live	4.86297e+06	0	0	0	N/A	160886	479.315	125.333	1023	1.5078e+09	188.425	5.08955	7911.22	648.931	455.333	814.333	1.00379e+08	69.0702	1.6653	0.049173	µm	RGB	0.0490847
Live	4.87044e+06	0	0	0	N/A	160886	457.3	130.333	1023	1438541320	163.14	5.2732	6205.66	631.879	458.667	814	7.66696e+07	66.6418	1.69665	0.038572	µm	RGB
Live	4.87677e+06	0	0	0	N/A	160886	445.281	110.667	1023	1.40073e+09	161.76	5.2732	1943.69	635.198	470.333	812.333	2.41401e+07	63.4614	1.67355	0.012081	µm	RGB
Live	4.88311e+06	0	0	0	N/A	160886	426.43	126	1023	1341431792	142.816	5.1407	1898.89	623.934	464	812.333	2.31654e+07	58.4757	1.74569	0.011803	µm	RGB
Live	4.88983e+06	0	0	0	N/A	160886	487.354	83.3333	1023	1533084280	231.951	6.51592	16095.8	607.996	440.333	814.333	1.91344e+08	70.9424	1.73118	0.100044	µm	RGB
Live	4.90437e+06	0	0	0	N/A	160886	445.992	107	1023	1.40297e+09	198.05	6.27607	13327	635.544	453.667	814.333	1.65607e+08	74.9392	1.73662	0.082835	µm	RGB
dbc 119
Live	4.94948e+06	0	0	0	N/A	160886	526.968	113.333	1023	1.6577e+09	163.067	4.092	2469.25	623.466	471	812.333	3.0101e+07	54.7888	1.64359	0.015348	µm	RGB	0.063899
Live	4.95768e+06	0	0	0	N/A	160886	524.263	127.667	1023	1.64919e+09	164.9	4.24481	2835.45	633.364	465	811.333	35113724	60.7858	1.65574	0.017624	µm	RGB
Live	4.967e+06	0	0	0	N/A	160886	474.652	101	1023	1.49313e+09	125.296	4.50661	4814.12	619.257	474.333	812.667	58289452	57.3411	1.65708	0.029922	µm	RGB
Live	4.97559e+06	0	0	0	N/A	160886	537.126	112.667	1023	1.68965e+09	233.415	5.115	27060.5	637.322	441	814	337207152	77.958	1.71459	0.168196	µm	RGB
Live	4.98155e+06	0	0	0	N/A	160886	528.83	100	1023	1.66356e+09	212.689	5.115	20989.1	649.292	453.333	814.333	2.66462e+08	76.8078	1.71097	0.130459	µm	RGB
Live	4.98677e+06	0	0	0	N/A	160886	557.433	90.3333	1023	1753531076	235.027	4.58744	3514.64	645.956	448	812.667	4.43901e+07	68.4023	1.66461	0.021845	µm	RGB
dbc 118
Live	5.03561e+06	0	0	0	N/A	160886	547.59	115.667	1023	1722567652	298.406	6.43396	9219.09	619.793	442.667	813.667	1.11721e+08	76.5351	1.7587	0.057302	µm	RGB	0.0179037
Live	5.04233e+06	0	0	0	N/A	160886	433.626	131.333	1023	1364068660	120.659	5.1407	1785.14	609.075	473.333	812	2.12591e+07	48.7026	1.6345	0.011096	µm	RGB
Live	5.05239e+06	0	0	0	N/A	160886	395.804	120	1023	1.24509e+09	94.9299	5.55978	1673.65	607.082	476.333	804	1.98662e+07	51.5014	1.67857	0.010403	µm	RGB
Live	5.06395e+06	0	0	0	N/A	160886	461.443	117.667	1023	1.45158e+09	126.577	4.83333	1641.12	611.932	460.667	813	1.96357e+07	45.4095	1.76739	0.010201	µm	RGB
Live	5.07067e+06	0	0	0	N/A	160886	456.615	79.6667	1023	1436386396	115.137	4.78037	1450.86	615.665	461.667	812.333	1.74652e+07	52.8644	1.65714	0.009018	µm	RGB
Live	5.08633e+06	0	0	0	N/A	160886	453.222	127	1023	1.42571e+09	125.597	4.69266	1512.65	622.791	479.333	813.667	1.84197e+07	56.8229	1.69729	0.009402	µm	RGB
dbc 117
Live	5.13443e+06	0	0	0	N/A	160886	357.383	87	1023	1.12423e+09	127.384	6.68628	3550.04	610.002	442.667	810	4.23415e+07	58.931	1.73593	0.022065	µm	RGB	0.0220358
Live	5.15269e+06	0	0	0	N/A	160886	432.834	87	1023	1361578616	266.151	7.57778	2636.19	627.381	455.667	814.333	3.23377e+07	64.5982	1.74785	0.016385	µm	RGB
Live	5.15866e+06	0	0	0	N/A	160886	395.314	92	1023	1243548824	179.551	6.43396	2546.17	623.854	462	812	31057932	61.8511	1.6722	0.015826	µm	RGB
Live	5.16463e+06	0	0	0	N/A	160886	412.976	69.3333	1023	1.29911e+09	254.73	7.75	2474.98	628.256	438	813.667	3.04026e+07	64.8361	1.84475	0.015383	µm	RGB
Live	5.17172e+06	0	0	0	N/A	160886	474.972	111.667	1023	1.49413e+09	297.347	6.55769	3311.91	624.134	470.667	814	40416436	61.9864	1.6736	0.020585	µm	RGB
Live	5.17918e+06	0	0	0	N/A	160886	401.605	66.3333	1023	1.26334e+09	205.987	6.55769	6752.5	628.989	462	813	8.30442e+07	69.3975	1.70316	0.041971	µm	RGB
DB RAS
db 83
Live	1.34261e+07	0	0	0	N/A	160886	627.13	108	1023	1.97278e+09	201.093	4.91827	27850.4	661.317	443	814.333	3.60116e+08	73.1708	1.64373	0.173106	µm	RGB	0.121909
Live	1.34462e+07	0	0	0	N/A	160886	531.133	130.333	1023	1.6708e+09	213.093	5.16667	7133.42	635.581	455	814.333	8.86483e+07	67.8939	1.65574	0.044338	µm	RGB
Live	1.34626e+07	0	0	0	N/A	160886	603.955	135.333	1023	1.89988e+09	215.671	4.84834	14492.9	640.274	435.333	813.667	1.81436e+08	67.1731	1.72281	0.090082	µm	RGB
Live	1.34835e+07	0	0	0	N/A	160886	683.531	100.333	1023	2150203036	206.494	5.01471	38262.2	665.121	443.333	814.333	4.97591e+08	79.5719	1.69167	0.237821	µm	RGB
Live	1.34928e+07	0	0	0	N/A	160886	576.318	118.667	1023	1.81294e+09	225.936	5.47059	23957.3	633.682	447.333	814.333	296831932	79.2566	1.72708	0.148908	µm	RGB
Live	1.35044e+07	0	0	0	N/A	160886	479.018	62.3333	1023	1.50686e+09	164.909	5.2732	5984.72	632.082	461.667	813	7.39637e+07	69.1481	1.67495	0.037198	µm	RGB
db 156
Live	1.35674e+07	0	0	0	N/A	160886	561.307	126.333	1023	1.76572e+09	200.282	4.44783	1336.92	629.483	473.667	812.333	1.64547e+07	61.6541	1.66053	0.00831	µm	RGB	0.00863483
Live	1.35726e+07	0	0	0	N/A	160886	566.15	167.667	1023	1.78095e+09	181.008	3.91954	1194.73	628.17	477.667	812.667	1.46741e+07	60.7808	1.69182	0.007426	µm	RGB
Live	1.35793e+07	0	0	0	N/A	160886	542.743	165	1023	1.70732e+09	224.447	4.31646	1727.25	619.097	487.667	812.333	2.09082e+07	53.4428	1.61723	0.010736	µm	RGB
Live	1.35846e+07	0	0	0	N/A	160886	566.954	155.333	1023	1783483468	240.439	4.2625	839.587	620.75	488.333	810	10190228	59.2259	1.63232	0.005219	µm	RGB
Live	1.35905e+07	0	0	0	N/A	160886	644.984	167.333	1023	2028945000	247.191	4.17551	1590.8	627.107	489.333	814.333	19505540	60.3043	1.63158	0.009888	µm	RGB
Live	1.35995e+07	0	0	0	N/A	160886	555.373	83.3333	1023	1.74705e+09	197.169	4.46725	1645.83	636.23	481.333	814	2.04739e+07	65.4221	1.6558	0.01023	µm	RGB
db 112
Live	1.36677e+07	0	0	0	N/A	160886	421.828	93.3333	1023	1326957148	114.541	6.51592	3075.21	604.858	445.333	812.333	3.63689e+07	57.4557	1.6875	0.019114	µm	RGB	0.0221992
Live	1.36737e+07	0	0	0	N/A	160886	446.82	76.6667	1023	1.40558e+09	133.47	6.64286	3339.73	605.858	465	811	3.95625e+07	55.5129	1.67432	0.020758	µm	RGB
Live	1.36811e+07	0	0	0	N/A	160886	451.291	100.667	1023	1.41964e+09	137.769	6.08929	3529.78	622.794	447.667	814.333	4.29827e+07	63.0609	1.67081	0.02194	µm	RGB
Live	1.36875e+07	0	0	0	N/A	160886	436.918	80.3333	1023	1.37442e+09	143.225	6.39375	6148.38	610.663	456.667	812.333	7.34115e+07	62.9548	1.67568	0.038216	µm	RGB
Live	1.37095e+07	0	0	0	N/A	160886	417.63	91.6667	1023	1.31375e+09	192.264	7.05517	3718.81	606.157	455	814	4.40749e+07	70.4308	1.73019	0.023115	µm	RGB
Live	1.37262e+07	0	0	0	N/A	160886	482.525	104.333	1023	1517892632	148.617	5.115	1617.19	614.064	489.667	808.333	1.94167e+07	52.3347	1.60643	0.010052	µm	RGB
db 105
Live	1.37784e+07	0	0	0	N/A	160886	619.262	177	1023	1.94803e+09	170.248	4.17551	45538.2	614.775	451.667	814.333	5.47386e+08	66.5324	1.72163	0.283045	µm	RGB	0.118508
Live	1.37915e+07	0	0	0	N/A	160886	602.391	67.6667	1023	1894957980	165.976	10.0294	31566.9	608.515	457.333	813	3.75583e+08	58.8842	1.68856	0.196206	µm	RGB
Live	1.38034e+07	0	0	0	N/A	160886	476.951	90.6667	1023	1.50036e+09	190.056	6.55769	14752.9	624.932	442.333	814	180265416	58.8581	1.65567	0.091698	µm	RGB
Live	1.38273e+07	0	0	0	N/A	160886	647.175	194.333	1023	2035835092	148.779	3.2069	4261.35	639.924	471.333	813	5.33184e+07	57.5266	1.6288	0.026487	µm	RGB
Live	1.38396e+07	0	0	0	N/A	160886	571.137	169.667	1023	1.79664e+09	177.333	3.42141	6646.11	619.468	475.667	811.667	80498600	47.9187	1.61304	0.041309	µm	RGB
Live	1.38452e+07	0	0	0	N/A	160886	496.147	60.6667	1023	1.56074e+09	237.981	8.38525	11632.9	633.118	441	813.333	1.44004e+08	68.0503	1.76419	0.072305	µm	RGB
db 101
Live	1.38743e+07	0	0	0	N/A	160886	417.467	111.667	1023	1.31324e+09	138.183	5.71508	16702.5	603.103	442	813.667	1.96959e+08	75.7959	1.75652	0.103816	µm	RGB	0.0989438
Live	1.38821e+07	0	0	0	N/A	160886	435.455	89.6667	1023	1.36982e+09	187.02	5.71508	14101.3	610.794	436.667	814	1.68406e+08	77.3565	1.74892	0.087648	µm	RGB
Live	1.38903e+07	0	0	0	N/A	160886	451.512	95.6667	1023	1.42033e+09	202.325	6.55769	27481.3	605.129	427.333	814	325152488	80.7222	1.77024	0.170812	µm	RGB
Live	1.38963e+07	0	0	0	N/A	160886	354.626	97	1023	1115557972	125.951	7.30714	1595.91	619.181	486.667	814	1.93209e+07	53.5009	1.64213	0.009919	µm	RGB
Live	1.39034e+07	0	0	0	N/A	160886	438.249	67.3333	1023	1378611408	192.413	7.10417	21455.3	620.226	442	814	2.60187e+08	82.9681	1.75488	0.133357	µm	RGB
Live	1.39157e+07	0	0	0	N/A	160886	443.61	97.3333	1023	1395476332	206.097	6.31482	14175.8	634.637	436.667	814	1.75904e+08	79.1484	1.75162	0.088111	µm	RGB
db 82
Live	1.39709e+07	0	0	0	N/A	160886	529.92	82	1023	1.66698e+09	196.974	4.94203	3099.56	640.856	467.333	813	3.88385e+07	65.5218	1.64097	0.019265	µm	RGB	0.0173783
Live	1.39768e+07	0	0	0	N/A	160886	469.551	92	1023	1.47708e+09	209.956	6.2	1772.26	625.354	481.333	810	21669784	58.4869	1.6202	0.011016	µm	RGB
Live	1.39828e+07	0	0	0	N/A	160886	526.469	135.667	1023	1.65613e+09	168.614	3.99609	2298.23	628.314	476.667	813.667	2.82339e+07	59.538	1.65918	0.014285	µm	RGB
Live	1.39884e+07	0	0	0	N/A	160886	574.414	125	1023	1.80695e+09	207.044	4.19262	3845.65	643.031	471.667	813.667	4.83508e+07	67.4352	1.63508	0.023903	µm	RGB
Live	1.39943e+07	0	0	0	N/A	160886	500.854	94.6667	1023	1575550252	174.363	4.62896	3036.14	629.715	473.667	814.333	3.73824e+07	61.2153	1.67842	0.018871	µm	RGB
Live	1.39992e+07	0	0	0	N/A	160886	486.305	106.333	1023	1529783768	198.168	6.05325	2723.75	632.072	443.333	812.333	3.36616e+07	64.4906	1.69102	0.01693	µm	RGB
db 81
Live	1.40615e+07	0	0	0	N/A	160886	647.166	107.333	1023	2.03581e+09	255.102	4.39056	13989.4	653.09	470.333	814	178638508	73.1675	1.66053	0.086952	µm	RGB	0.161161
Live	1.40678e+07	0	0	0	N/A	160886	541.715	98	1023	1.70409e+09	186.343	4.48684	11739.9	638.414	464	814.333	1.46544e+08	68.0517	1.70675	0.07297	µm	RGB
Live	1.40771e+07	0	0	0	N/A	160886	565.555	156.667	1023	1.77908e+09	225.585	4.91827	13372.8	655.089	472	814.333	171287372	72.2077	1.64575	0.08312	µm	RGB
Live	1.40864e+07	0	0	0	N/A	160886	562.801	139.333	1023	1770417808	191.461	4.91827	30853.4	648.376	462.333	814.333	3.91139e+08	71.74	1.65102	0.191771	µm	RGB
Live	1.40928e+07	0	0	0	N/A	160886	597.562	88	1023	1.87977e+09	207.501	5.19289	33977.7	651.197	450.667	814.333	4.32621e+08	75.2308	1.67909	0.211191	µm	RGB
Live	1.41002e+07	0	0	0	N/A	160886	602.885	121.333	1023	1896511768	194.701	5.30052	51638.9	635.774	451	814.333	641920520	73.2711	1.67983	0.320965	µm	RGB
db 69
Live	1.41606e+07	0	0	0	N/A	160886	485.4	108.333	1023	1526937664	118.576	5.035	2587.29	624.804	446.667	812.667	3.16076e+07	54.377	1.75274	0.016081	µm	RGB	0.0295777
Live	1.4167e+07	0	0	0	N/A	160886	523.242	117	1023	1645978560	141.7	4.56696	14059.2	647.441	435.667	814.333	1.77976e+08	61.3407	1.7155	0.087386	µm	RGB
Live	1.41744e+07	0	0	0	N/A	160886	493.322	121	1023	1551855632	127.761	4.53363	2284.52	618.414	453.333	806.667	27623324	45.6775	1.71552	0.0142	µm	RGB
Live	1.41808e+07	0	0	0	N/A	160886	616.852	121	1023	1940448800	240.218	5.21939	5807.35	649.07	433.333	813.667	7.37006e+07	67.7113	1.80401	0.036096	µm	RGB
Live	1.4186e+07	0	0	0	N/A	160886	503.738	83	1023	1584623168	200.637	5.87931	2034.93	623.362	443.333	812.333	2.48023e+07	57.4189	1.78982	0.012648	µm	RGB
Live	1.41927e+07	0	0	0	N/A	160886	471.581	107	1023	1.48346e+09	178.454	5.98246	1778.6	631.136	442.333	814	21948380	63.8049	1.73019	0.011055	µm	RGB
db 68
Live	1.42651e+07	0	0	0	N/A	160886	589.044	162.333	1023	1.85297e+09	184.855	3.76103	6187.45	660.517	457	828.667	7.99093e+07	61.0271	1.76068	0.038459	µm	RGB	0.0342577
Live	1.42759e+07	0	0	0	N/A	160886	579.826	191	1023	1.82397e+09	149.058	3.45608	4026.09	655.322	454.667	827.333	5.1587e+07	61.1884	1.76231	0.025024	µm	RGB
Live	1.42826e+07	0	0	0	N/A	160886	566.95	132.667	1023	1.78347e+09	184.21	3.80297	3211.26	644.571	455	826.667	4.04713e+07	49.4611	1.71849	0.01996	µm	RGB
Live	1.42897e+07	0	0	0	N/A	160886	566.065	181.333	1023	1.78069e+09	143.938	3.26837	2916.46	644.263	455	826	3.67385e+07	51.8907	1.73941	0.018127	µm	RGB
Live	1.42967e+07	0	0	0	N/A	160886	595.141	143.667	1023	1.87215e+09	185.404	4.19262	4666.83	661.349	456	828.667	6.03467e+07	63.9565	1.7384	0.029007	µm	RGB
Live	1.43038e+07	0	0	0	N/A	160886	654.762	113	1023	2059702876	184.16	4.46725	12061.5	691.898	442	828.667	1.63172e+08	74.6418	1.76709	0.074969	µm	RGB
db 67
Live	1.4349e+07	0	0	0	N/A	160886	508.928	89	1023	1600950484	229.436	6.73026	8513.7	647.318	443	814	1.07755e+08	72.2288	1.7234	0.052917	µm	RGB	0.096991
Live	1.43568e+07	0	0	0	N/A	160886	477.588	88.3333	1023	1.50236e+09	113.191	6.22981	4565.15	618.096	441	809.333	5.51713e+07	46.6347	1.68856	0.028375	µm	RGB
Live	1.4365e+07	0	0	0	N/A	160886	594.42	79.3333	1023	1869882924	222.732	5.74719	20044.3	664.804	428.333	814.333	2.60547e+08	77.7883	1.7807	0.124587	µm	RGB
Live	1.43706e+07	0	0	0	N/A	160886	495.333	69.6667	1023	1.55818e+09	124.25	4.84135	3358.96	625.357	446	809.667	4.10709e+07	51.189	1.68059	0.020878	µm	RGB
Live	1.43769e+07	0	0	0	N/A	160886	520.433	100	1023	1637139708	143.378	5.44149	9122.94	626.206	442.333	812.333	111700128	53.3402	1.72473	0.056704	µm	RGB
Live	1.43873e+07	0	0	0	N/A	160886	600.878	121.667	1023	1890197332	179.502	5.62088	48022.2	634.674	431	814.333	5.95928e+08	78.5047	1.77632	0.298485	µm	RGB
db 66
Live	1.70173e+07	0	0	0	N/A	160886	547.086	119	1023	1.72098e+09	141.691	4.60811	1980.11	626.358	450	811.667	24250080	55.9554	1.72553	0.012307	µm	RGB	0.009735
Live	1.7024e+07	0	0	0	N/A	160886	562.916	109	1023	1.77078e+09	146.91	5.35602	1645.83	627.269	453	811.667	2.01855e+07	56.9104	1.74353	0.01023	µm	RGB
Live	1.70284e+07	0	0	0	N/A	160886	542.96	126	1023	1.708e+09	153.416	5.115	1550.49	628.041	438	813.333	19039692	62.2156	1.71855	0.009637	µm	RGB
Live	1.70355e+07	0	0	0	N/A	160886	628.433	164.333	1023	1.97688e+09	184.492	4.1417	1898.48	628.132	460.333	813	2.33162e+07	61.7647	1.72921	0.0118	µm	RGB
Live	1.70448e+07	0	0	0	N/A	160886	595.99	133	1023	1874822628	187.248	4.60811	1520.22	621.677	482	813	1.84787e+07	54.001	1.66116	0.009449	µm	RGB
Live	1.70531e+07	0	0	0	N/A	160886	579.988	161.667	1023	1.82449e+09	146.671	3.43289	802.354	619.9	471.667	808.667	9.725e+06	54.2402	1.7155	0.004987	µm	RGB
db 50
Live	1.70956e+07	0	0	0	N/A	160886	595.552	117.333	1023	1.87344e+09	188.752	5.19289	1640.51	630.376	435	814	20219936	65.6699	1.78366	0.010197	µm	RGB	0.0326053
Live	1.71034e+07	0	0	0	N/A	160886	627.69	90	1023	1.97454e+09	236.114	5.08955	4431.15	637.024	443.667	814.333	5.51918e+07	63.8592	1.73448	0.027542	µm	RGB
Live	1.71108e+07	0	0	0	N/A	160886	514.097	126.333	1023	1.61721e+09	155.088	5.35602	1568.29	631.426	452.333	813.667	19362036	63.9017	1.72436	0.009748	µm	RGB
Live	1.71179e+07	0	0	0	N/A	160886	667.675	108	1023	2100324308	209.142	5.62088	21810.2	674.273	444.667	814.333	2.8754e+08	76.385	1.73876	0.135563	µm	RGB
Live	1.71299e+07	0	0	0	N/A	160886	560.299	109.667	1023	1762548208	169.306	4.80282	1112.7	628.775	449	813	1.36796e+07	62.2107	1.80401	0.006916	µm	RGB
Live	1.71373e+07	0	0	0	N/A	160886	528.594	96.3333	1023	1.66281e+09	130.616	5.21939	911.598	618.757	449.333	814	11028716	54.2082	1.72591	0.005666	µm	RGB
db 48
Live	1.71802e+07	0	0	0	N/A	160886	570.903	108.667	1023	1.79591e+09	168.174	4.96602	13465.5	645.653	474.667	813	169990148	58.8833	1.63489	0.083696	µm	RGB	0.0446758
Live	1.71891e+07	0	0	0	N/A	160886	533.321	90.3333	1023	1677682448	164.848	5.35602	13020.3	644.384	450.333	813	1.64047e+08	62.7595	1.71489	0.080929	µm	RGB
Live	1.71977e+07	0	0	0	N/A	160886	506.658	96.6667	1023	1593807876	133.201	5.5	8360.68	629.284	448	813.667	1.0287e+08	60.4278	1.6841	0.051966	µm	RGB
Live	1.72067e+07	0	0	0	N/A	160886	521.55	103.667	1023	1640655540	213.9	5.74719	2979.88	635.547	443	812	3.70295e+07	64.4779	1.72495	0.018522	µm	RGB
Live	1.72126e+07	0	0	0	N/A	160886	471.969	97.3333	1023	1484686088	169.659	6.27607	2746.25	625.581	443	813.667	33591184	61.3296	1.71097	0.017069	µm	RGB
Live	1.72242e+07	0	0	0	N/A	160886	459.824	84.6667	1023	1.44648e+09	156.504	6.43396	2553.74	623.096	459	811.667	3.11124e+07	51.4	1.67708	0.015873	µm	RGB
db 47
Live	1.72846e+07	0	0	0	N/A	160886	508.472	92.3333	1023	1.59951e+09	214.605	5.44149	1959.24	636.373	462.667	814	2.43782e+07	66.4981	1.70168	0.012178	µm	RGB	0.0106115
Live	1.72969e+07	0	0	0	N/A	160886	525.248	121.333	1023	1.65229e+09	206.865	4.71429	1840.18	630.592	452.333	812.667	2.26887e+07	60.3723	1.73876	0.011438	µm	RGB
Live	1.73032e+07	0	0	0	N/A	160886	537.618	127.333	1023	1691200952	221.335	4.89474	1486.05	622.416	467	805	18084924	51.5796	1.71735	0.009237	µm	RGB
Live	1.73152e+07	0	0	0	N/A	160886	489.752	120	1023	1.54063e+09	176.686	4.89474	1802.94	630.599	474	813.667	2.22299e+07	60.2882	1.6544	0.011206	µm	RGB
Live	1.73241e+07	0	0	0	N/A	160886	495.621	132.667	1023	1559088632	184.573	4.82547	1518.99	619.282	466	811.667	1.83927e+07	54.4064	1.65914	0.009441	µm	RGB
Live	1.73316e+07	0	0	0	N/A	160886	504.873	152.667	1023	1.58819e+09	198.131	4.44783	1636.01	618.375	472.667	811	19780572	51.2497	1.69767	0.010169	µm	RGB
db 46
Live	1.73957e+07	0	0	0	N/A	160886	572.645	125.667	1023	1.80138e+09	187.084	5.01471	7637.09	654.468	440.333	814	97727820	69.6918	1.67702	0.047469	µm	RGB	0.035768
Live	1.74043e+07	0	0	0	N/A	160886	451.123	109	1023	1419110108	90.198	5.31492	377.446	612.779	488	802.667	4.52231e+06	41.7881	1.64344	0.002346	µm	RGB
Live	1.74099e+07	0	0	0	N/A	160886	521.561	88.3333	1023	1.64069e+09	186.904	5.30052	2208.42	628.076	459	810.333	2.71203e+07	58.3652	1.71186	0.013727	µm	RGB
Live	1.74215e+07	0	0	0	N/A	160886	590.108	112	1023	1.85632e+09	226.195	5.4127	6803.23	640.703	455.333	813.667	8.52263e+07	66.4715	1.73233	0.042286	µm	RGB
Live	1.74297e+07	0	0	0	N/A	160886	587.614	110	1023	1.84847e+09	202.899	5.47059	15755.8	679.287	458	814.333	2.09264e+08	73.8255	1.69167	0.097931	µm	RGB
Live	1.74386e+07	0	0	0	N/A	160886	475.29	117.667	1023	1495132504	151.716	5.1407	1745.46	624.54	461	809.667	2.13143e+07	57.1788	1.74242	0.010849	µm	RGB
db 45
Live	1.74871e+07	0	0	0	N/A	160886	400.763	43	1023	1260692644	168.038	10.3333	5217.75	619.928	436.667	812	63245100	63.9714	1.77024	0.032431	µm	RGB	0.033174
Live	1.74979e+07	0	0	0	N/A	160886	383.503	65.6667	1023	1.20639e+09	143.452	8.12	3320.09	618.098	443.333	814.333	40124444	58.7364	1.77483	0.020636	µm	RGB
Live	1.7505e+07	0	0	0	N/A	160886	399.592	61.6667	1023	1.25701e+09	193.671	8.11905	4740.27	626.926	443	813.667	5.8106e+07	65.3577	1.75271	0.029463	µm	RGB
Live	1.75102e+07	0	0	0	N/A	160886	467.423	69.3333	1023	1.47039e+09	223.59	7.25532	7218.52	625.313	449	814.333	88256728	64.5777	1.75054	0.044867	µm	RGB
Live	1.75158e+07	0	0	0	N/A	160886	436.292	62.3333	1023	1.37246e+09	186.06	7.75	6157.38	626.163	435	814.333	75384992	62.9445	1.77243	0.038272	µm	RGB
Live	1.75221e+07	0	0	0	N/A	160886	527.148	85	1023	1.65826e+09	266.463	6.91216	5369.55	637.336	438	814	6.69127e+07	71.2352	1.79823	0.033375	µm	RGB
db 44
Live	1.76444e+07	0	0	0	N/A	160886	611.528	121.333	1023	1.9237e+09	216.871	4.87143	18815.6	687.736	458.333	814.333	253012560	73.6844	1.70588	0.11695	µm	RGB	0.0824355
Live	1.7653e+07	0	0	0	N/A	160886	610.249	127.667	1023	1919677492	131.222	4.54667	20875.5	662.605	430.333	814.333	2.70454e+08	64.5833	1.66667	0.129753	µm	RGB
Live	1.76597e+07	0	0	0	N/A	160886	592.92	142	1023	1.86517e+09	137.837	4.10843	27723.8	676.489	453.333	814.333	3.66703e+08	69.0047	1.67769	0.172319	µm	RGB
Live	1.76683e+07	0	0	0	N/A	160886	562.049	127	1023	1768053108	130.448	4.76526	6874.42	633.494	455.333	813.667	85149180	56.9418	1.72377	0.042728	µm	RGB
Live	1.76821e+07	0	0	0	N/A	160886	541.964	65	1023	1.70487e+09	182.197	7.15385	3131.67	625.042	451.333	812	38272584	56.2714	1.71975	0.019465	µm	RGB
Live	1.76873e+07	0	0	0	N/A	160886	544.074	106	1023	1711509956	183.095	4.96602	2155.63	634.71	438.667	813	26751772	64.6002	1.73979	0.013398	µm	RGB
db 43
Live	1.77246e+07	0	0	0	N/A	160886	384.962	103.333	1023	1.21098e+09	139.05	6.39375	2291.27	621.688	445	813	27851620	62.8924	1.79204	0.014242	µm	RGB	0.0206878
Live	1.77298e+07	0	0	0	N/A	160886	382.879	108	1023	1.20443e+09	134.286	6.39375	2755.87	623.479	460.333	813.333	3.35956e+07	60.5133	1.72863	0.017129	µm	RGB
Live	1.77335e+07	0	0	0	N/A	160886	417.397	101	1023	1.31302e+09	188.914	6.82	4334.18	623.1	445.667	813.667	52803980	66.8015	1.75705	0.026939	µm	RGB
Live	1.77399e+07	0	0	0	N/A	160886	461.631	111.667	1023	1452165776	254.143	6.6	2289.43	623.564	442.333	809.667	2.79132e+07	67.1288	1.79688	0.01423	µm	RGB
Live	1.77466e+07	0	0	0	N/A	160886	472.24	117	1023	1.48554e+09	239.095	6.47468	4493.14	625.687	456	813	5.49679e+07	70.1793	1.73176	0.027927	µm	RGB
Live	1.77529e+07	0	0	0	N/A	160886	692.347	113.333	1023	2177936420	336.529	6.08929	3806.58	626.823	439.667	814.333	4.66532e+07	74.687	1.77632	0.02366	µm	RGB
db 42
Live	1.78074e+07	0	0	0	N/A	160886	581.511	110.667	1023	1829274344	221.184	5.44149	19830.9	637.984	443.333	814.333	2.47375e+08	73.8041	1.73291	0.12326	µm	RGB	0.109874
Live	1.7813e+07	0	0	0	N/A	160886	454.961	85	1023	1431183848	181.137	5.62088	7459.11	619.931	455.667	813.333	9.04132e+07	60.8641	1.70763	0.046363	µm	RGB
Live	1.79987e+07	0	0	0	N/A	160886	460.479	103.333	1023	1.44854e+09	213.612	6.12575	8969.71	627.737	452.667	814.333	110092440	67.5384	1.71398	0.055752	µm	RGB
Live	1.80057e+07	0	0	0	N/A	160886	448.075	170.333	1023	1.40952e+09	94.4433	3.81439	12990.3	598.093	465.333	809.333	1.51911e+08	45.3662	1.60164	0.080742	µm	RGB
Live	1.80177e+07	0	0	0	N/A	160886	552.924	83.3333	1023	1.73935e+09	214.736	7.99219	39084.8	632.31	434.667	814.333	4.83214e+08	80.7614	1.76304	0.242934	µm	RGB
Live	1.80244e+07	0	0	0	N/A	160886	456.527	74.3333	1023	1.43611e+09	121.995	7.04348	17728.7	616.719	445.333	814	2.1378e+08	57.3414	1.67857	0.110194	µm	RGB
db 41
Live	1.80661e+07	0	0	0	N/A	160886	406.584	111.333	1023	1.279e+09	107.518	5.9	2205.14	617.443	440	812.333	2.66217e+07	52.595	1.70878	0.013706	µm	RGB	0.0116368
Live	1.80747e+07	0	0	0	N/A	160886	388.576	107.667	1023	1.22235e+09	116.489	6.64286	1585.68	623.023	460.333	812	1.93162e+07	57.1347	1.71642	0.009856	µm	RGB
Live	1.80799e+07	0	0	0	N/A	160886	493.003	169	1023	1550853476	187.133	4.2625	1846.52	620.658	487.667	808.667	2.24082e+07	53.6857	1.6334	0.011477	µm	RGB
Live	1.8087e+07	0	0	0	N/A	160886	508.687	125.667	1023	1.60019e+09	210.67	4.80282	2608.37	626.879	446.667	812.333	31970804	56.8571	1.69038	0.016212	µm	RGB
Live	1.80941e+07	0	0	0	N/A	160886	494.173	111.333	1023	1.55453e+09	102.048	3.84231	1167.52	616.332	485.333	802.333	14069620	36.2532	1.58763	0.007257	µm	RGB
Live	1.81023e+07	0	0	0	N/A	160886	465.162	148	1023	1.46327e+09	157.748	4.58744	1820.13	623.081	485.333	810	22174212	45.8857	1.65092	0.011313	µm	RGB
db 160
Live	1.82105e+07	0	0	0	N/A	160886	488.261	151	1023	1.53593e+09	206.564	4.40948	6620.75	631.71	478	814.333	8.17761e+07	63.7037	1.63307	0.041152	µm	RGB	0.0173807
Live	1.82179e+07	0	0	0	N/A	160886	496.56	163	1023	1562043336	225.082	4.46725	3745.61	639.741	479.667	813.667	46852076	69.1909	1.64097	0.023281	µm	RGB
Live	1.8225e+07	0	0	0	N/A	160886	421.969	191.333	1023	1.3274e+09	131.106	4.092	964.175	611.57	496.667	800	1.15293e+07	44.0109	1.59681	0.005993	µm	RGB
Live	1.82313e+07	0	0	0	N/A	160886	443.447	128.333	1023	1.39497e+09	128.222	3.80297	696.382	610.294	505.333	794.333	8.30977e+06	39.4849	1.57228	0.004328	µm	RGB
Live	1.82366e+07	0	0	0	N/A	160886	462.581	190.667	1023	1.45515e+09	171.357	4.35319	1644.19	620.554	484	811.333	1.99496e+07	54.3205	1.67217	0.01022	µm	RGB
Live	1.82463e+07	0	0	0	N/A	160886	451.737	29	1023	1.42104e+09	143.403	4.82547	3106.72	632.154	467	813.667	3.83996e+07	64.8386	1.63636	0.01931	µm	RGB
db 159
Live	1.83175e+07	0	0	0	N/A	160886	537.797	110.333	1023	1.69176e+09	260.492	5.68333	5636.32	628.695	468	813.667	6.92847e+07	62.7345	1.66804	0.035033	µm	RGB	0.0196168
Live	1.83223e+07	0	0	0	N/A	160886	477.015	137.333	1023	1.50056e+09	171.54	4.29832	2702.47	634.353	473.333	811.667	3.35192e+07	64.3584	1.65164	0.016797	µm	RGB
Live	1.83272e+07	0	0	0	N/A	160886	426.965	61	1023	1.34311e+09	153.987	5.06436	2907.87	620.822	480.667	812.667	3.52975e+07	53.3821	1.61089	0.018074	µm	RGB
Live	1.83328e+07	0	0	0	N/A	160886	462.621	116.667	1023	1.45528e+09	184.861	4.67123	3461.25	626.444	448.333	813.667	4.23952e+07	62.1002	1.6875	0.021514	µm	RGB
Live	1.8338e+07	0	0	0	N/A	160886	425.803	44.6667	1023	1.33946e+09	140.734	5.30052	1765.3	615.617	441.667	811	2.12486e+07	51.9629	1.83674	0.010972	µm	RGB
Live	1.83447e+07	0	0	0	N/A	160886	483.829	64.3333	1023	1521995228	244.159	6.31482	2463.32	629.185	461.667	814	30304080	65.427	1.7155	0.015311	µm	RGB
db 158
Live	1.84625e+07	0	0	0	N/A	160886	508.395	107.333	1023	1.59927e+09	224.399	5.71508	16512.3	608.796	438.333	814	196553428	74.2607	1.74675	0.102633	µm	RGB	0.15257
Live	1.8473e+07	0	0	0	N/A	160886	391.942	48	1023	1232944364	153.434	9.13393	2980.49	618.476	446.667	811.333	36042296	74.3137	1.74459	0.018525	µm	RGB
Live	1.84823e+07	0	0	0	N/A	160886	614.215	103.667	1023	1932153752	300.67	6.91216	21141.3	626.979	434	814.333	259170720	80.0878	1.7587	0.131405	µm	RGB
Live	1.84909e+07	0	0	0	N/A	160886	653.984	140	1023	2057256768	266.77	6.16265	46431.6	634.825	433.333	814.333	5.76328e+08	83.6407	1.74034	0.288598	µm	RGB
Live	1.85009e+07	0	0	0	N/A	160886	509.688	72.6667	1023	1.60334e+09	204.266	9.47222	51346.9	605.719	440	814.333	6.08118e+08	79.8892	1.75435	0.31915	µm	RGB
Live	1.85099e+07	0	0	0	N/A	160886	475.111	180.333	1023	1.49457e+09	153.253	3.98055	8866.19	617.847	462	811.667	1.07107e+08	62.1076	1.68829	0.055108	µm	RGB
db 157
Live	1.8555e+07	0	0	0	N/A	160886	499.653	92	1023	1.57177e+09	210.854	5.59016	13321.5	633.852	448	814	1.65098e+08	67.8386	1.6805	0.082801	µm	RGB	0.0415068
Live	1.85632e+07	0	0	0	N/A	160886	440.39	70.3333	1023	1.38535e+09	198.779	6.51592	2631.69	626.767	461.667	814	32250912	63.4795	1.67909	0.016357	µm	RGB
Live	1.85688e+07	0	0	0	N/A	160886	480.141	119.667	1023	1.51039e+09	191.592	4.96602	5468.16	633.341	473.333	814.333	67714288	66.4465	1.66119	0.033988	µm	RGB
Live	1.8577e+07	0	0	0	N/A	160886	509.19	94	1023	1.60177e+09	219.709	6.35404	8576.31	625.583	459.667	814.333	1.04903e+08	64.19	1.70253	0.053307	µm	RGB
Live	1.85841e+07	0	0	0	N/A	160886	556.101	131.333	1023	1.74934e+09	235.442	4.73611	5771.14	650.084	461	813.667	7.33555e+07	70.0037	1.65849	0.035871	µm	RGB
Live	1.85919e+07	0	0	0	N/A	160886	521.898	103	1023	1.64175e+09	237.999	5.91329	4298.38	640.29	449.333	813.667	5.38126e+07	69.2239	1.65173	0.026717	µm	RGB
db 155
Live	1.86188e+07	0	0	0	N/A	160886	542.502	133.333	1023	1706564108	224.388	5.01471	12673.4	616.432	464	814	1.52749e+08	55.522	1.62753	0.078772	µm	RGB	0.0693155
Live	1.86232e+07	0	0	0	N/A	160886	514.592	112	1023	1.61877e+09	234.777	6.47468	9898.9	618.597	448.667	813.333	1.19728e+08	63.5272	1.70975	0.061527	µm	RGB
Live	1.86314e+07	0	0	0	N/A	160886	548.274	91.3333	1023	1.72472e+09	241.886	5.87931	12821.1	619.607	460.667	812.333	1.55326e+08	55.887	1.64213	0.07969	µm	RGB
Live	1.86366e+07	0	0	0	N/A	160886	490.623	126.333	1023	1.54337e+09	220.111	5.52973	13339.1	620.927	474.667	814	1.61945e+08	57.1709	1.63286	0.08291	µm	RGB
Live	1.86452e+07	0	0	0	N/A	160886	546.621	96	1023	1.71952e+09	246.083	6.27607	14244.1	627.357	459	813.333	174724028	62.0252	1.64766	0.088535	µm	RGB
Live	1.86508e+07	0	0	0	N/A	160886	523.331	140.667	1023	1646256568	198.243	4.31646	3935.05	635.933	457.667	814	4.89287e+07	63.7942	1.60636	0.024459	µm	RGB
db 154
Live	1.87232e+07	0	0	0	N/A	160886	512.327	123	1023	1611639952	139.141	4.24481	2046.19	617.791	461	810.333	24716588	51.8386	1.68842	0.012718	µm	RGB	0.014372
Live	1.87284e+07	0	0	0	N/A	160886	639.928	96.3333	1023	2.01304e+09	276.86	4.40948	3782.85	634.31	458	814	4.69161e+07	65.4251	1.70526	0.023513	µm	RGB
Live	1.87459e+07	0	0	0	N/A	160886	610.714	118	1023	1.92114e+09	229.831	4.05952	2633.94	639.12	464.333	812.667	3.29147e+07	64.9337	1.66119	0.016371	µm	RGB
Live	1.875e+07	0	0	0	N/A	160886	560.38	158.667	1023	1.7628e+09	197.626	4.19262	1587.93	630.52	448.667	813.667	19576392	62.0252	1.8125	0.00987	µm	RGB
Live	1.87567e+07	0	0	0	N/A	160886	528.828	152.333	1023	1.66355e+09	180.583	4.94203	1415.06	636.573	447.667	813.667	17612688	64.9914	1.69811	0.008795	µm	RGB
Live	1.87638e+07	0	0	0	N/A	160886	563.347	177.667	1023	1.77214e+09	194.862	3.88973	2407.67	640.078	463.333	813.667	3.01323e+07	67.0959	1.70084	0.014965	µm	RGB
db 153
Live	1.88033e+07	0	0	0	N/A	160886	512.954	117.667	1023	1613612208	159.585	5.01471	26428.4	628.786	452.667	814.333	324918832	72.9788	1.71036	0.164267	µm	RGB	0.0892763
Live	1.88093e+07	0	0	0	N/A	160886	549.685	119	1023	1729160528	194.044	5.8125	34907.1	637.693	449.667	814.333	435238132	74.0225	1.71398	0.216967	µm	RGB
Live	1.88153e+07	0	0	0	N/A	160886	427.138	84.6667	1023	1343660344	175.677	6.68628	3162.57	625.051	454.667	813	3.86506e+07	64.3094	1.75488	0.019657	µm	RGB
Live	1.88208e+07	0	0	0	N/A	160886	507.613	86	1023	1.59681e+09	237.988	7.30714	14013.8	635.064	453.667	814.333	1.7401e+08	77.9332	1.73448	0.087104	µm	RGB
Live	1.88261e+07	0	0	0	N/A	160886	521.463	94.6667	1023	1.64038e+09	246.126	6.27607	4318.02	632.538	458.333	813.667	5.34039e+07	68.0321	1.70316	0.026839	µm	RGB
Live	1.88332e+07	0	0	0	N/A	160886	453.717	110.667	1023	1427270276	169.885	6.35404	3350.37	634.507	472	814	4.15653e+07	63.4612	1.64228	0.020824	µm	RGB
db 152	???
Live	1.88824e+07	0	0	0	N/A	160886	496.681	104	1023	1.56242e+09	186.188	4.96602	11888.4	619.196	439.333	813.667	143930868	64.5886	1.76035	0.073893	µm	RGB	0.036347
Live	1.88872e+07	0	0	0	N/A	160886	573.222	155	1023	1.8032e+09	235.23	3.81716	2801.49	641.632	455.667	814	35146028	64.9501	1.70588	0.017413	µm	RGB
Live	1.88917e+07	0	0	0	N/A	160886	609.051	156.333	1023	1.91591e+09	291.084	5.115	1993.4	632.101	460.667	813	2.46368e+07	55.663	1.66461	0.01239	µm	RGB
Live	1.89044e+07	0	0	0	N/A	160886	599.601	108.667	1023	1886181652	211.11	3.99609	2676.9	641.277	451.333	814	3.35644e+07	62.6134	1.74034	0.016638	µm	RGB
Live	1.89133e+07	0	0	0	N/A	160886	604.587	169.667	1023	1.90187e+09	250.334	4.1417	8588.78	647.108	455	813.667	1.0867e+08	63.823	1.70675	0.053384	µm	RGB
Live	1.89178e+07	0	0	0	N/A	160886	600.124	86.3333	1023	1.88783e+09	256.454	4.28034	7137.51	643.861	458.667	814.333	89854664	61.0636	1.65102	0.044364	µm	RGB
db 151
Live	1.8961e+07	0	0	0	N/A	160886	659.517	76.3333	1023	2.07466e+09	210.211	7.52206	26154	635.083	454.667	814	3.24766e+08	67.8422	1.67495	0.162562	µm	RGB	0.110898
Live	1.89659e+07	0	0	0	N/A	160886	594.361	74.6667	1023	1.8697e+09	223.563	7.35971	19656.4	622.843	457	814.333	2.39378e+08	60.9876	1.63618	0.122176	µm	RGB
Live	1.89715e+07	0	0	0	N/A	160886	547.863	63.3333	1023	1.72343e+09	209.916	7.75	18482.8	615.357	451	814.333	222380140	53.3317	1.62626	0.114881	µm	RGB
Live	1.89778e+07	0	0	0	N/A	160886	573.687	44	1023	1.80466e+09	199.871	6.95918	13099.9	619.647	452	813.667	1.58714e+08	53.5707	1.65773	0.081423	µm	RGB
Live	1.89864e+07	0	0	0	N/A	160886	641.734	90.6667	1023	2.01872e+09	207.696	4.84834	20552.5	633.154	439	814.333	2.54434e+08	60.8791	1.64898	0.127745	µm	RGB
Live	1.89905e+07	0	0	0	N/A	160886	543.467	97.6667	1023	1.7096e+09	153.565	4.71429	9106.16	612.594	490.667	810.667	1.09071e+08	41.6167	1.57171	0.0566	µm	RGB
db 145
Live	1.90464e+07	0	0	0	N/A	160886	594.708	133	1023	1.87079e+09	177.57	4.17551	3541.44	634.779	462.333	813.333	43954608	63.737	1.66667	0.022012	µm	RGB	0.0114958
Live	1.90543e+07	0	0	0	N/A	160886	621.408	127.333	1023	1954779776	227.992	4.52655	1672.22	632.687	444.667	813.667	2.06863e+07	67.8174	1.73134	0.010394	µm	RGB
Live	1.90595e+07	0	0	0	N/A	160886	550.253	185.667	1023	1730947632	165.841	3.55208	1491.58	626.098	487	812.333	1.82595e+07	60.1545	1.63821	0.009271	µm	RGB
Live	1.90655e+07	0	0	0	N/A	160886	575.323	194.333	1023	1.80981e+09	199.723	3.86038	1543.54	618.625	483.333	807	1.86701e+07	54.9051	1.61771	0.009594	µm	RGB
Live	1.90729e+07	0	0	0	N/A	160886	608.91	162.667	1023	1915465560	215.999	3.69314	1403.61	632.488	482.333	812	1.7358e+07	63.784	1.62249	0.008724	µm	RGB
Live	1.90804e+07	0	0	0	N/A	160886	607.191	182.667	1023	1.91006e+09	196.452	3.53979	1444.73	628.448	469	810	1.77524e+07	63.4144	1.72281	0.00898	µm	RGB
db 144
Live	1.91221e+07	0	0	0	N/A	160886	508.149	117.333	1023	1.5985e+09	209.096	5.08955	13410.3	620.367	453.333	814.333	1.62663e+08	61.1211	1.65164	0.083352	µm	RGB	0.0498838
Live	1.91303e+07	0	0	0	N/A	160886	557.971	95.3333	1023	1.75522e+09	248.88	7.00685	12893.9	620.109	448.667	813.667	156334332	65.4732	1.69102	0.080143	µm	RGB
Live	1.91379e+07	0	0	0	N/A	160886	551.826	54.3333	1023	1.73589e+09	300.606	8.38525	5830.05	627.289	463	814.333	7.1506e+07	66.1527	1.70105	0.036237	µm	RGB
Live	1.91441e+07	0	0	0	N/A	160886	521.259	38	1023	1.63974e+09	172.597	4.24481	6886.29	633.489	450.667	814.333	8.52955e+07	61.1287	1.64694	0.042802	µm	RGB
Live	1.91509e+07	0	0	0	N/A	160886	466.385	47.6667	1023	1.46712e+09	133.071	4.52655	4393.1	616.544	454	812.667	5.29587e+07	55.1276	1.66253	0.027306	µm	RGB
Live	1.91591e+07	0	0	0	N/A	160886	533.123	69.3333	1023	1677061036	219.571	5.115	4740.27	636.391	455.667	814.333	5.89832e+07	66.3962	1.65984	0.029463	µm	RGB
db 143
Live	1.92042e+07	0	0	0	N/A	160886	542.065	105.667	1023	1705189364	160.95	4.84834	39964.5	622.703	452	814.333	4.86582e+08	72.7197	1.69958	0.248402	µm	RGB	0.0927862
Live	1.92109e+07	0	0	0	N/A	160886	550.786	95.3333	1023	1732624088	170.697	5.115	9686.34	627.066	451	813.667	1.18761e+08	65.1231	1.68542	0.060206	µm	RGB
Live	1.92165e+07	0	0	0	N/A	160886	552.285	134	1023	1.73734e+09	154.679	4.44783	11123.9	626.968	448.667	813	136365480	62.8344	1.67568	0.069141	µm	RGB
Live	1.92232e+07	0	0	0	N/A	160886	590.778	100.333	1023	1858428176	199.515	4.96602	12810	632.439	440	814.333	1.58406e+08	66.4362	1.68894	0.079622	µm	RGB
Live	1.92299e+07	0	0	0	N/A	160886	561.855	130.333	1023	1767442872	169.333	4.54667	2738.89	621.49	470	810.333	3.3282e+07	56.7749	1.66322	0.017024	µm	RGB
Live	1.92377e+07	0	0	0	N/A	160886	577.156	145.667	1023	1.81558e+09	164.635	4.31646	13244.6	638.4	455.667	814	165322644	59.8216	1.62424	0.082322	µm	RGB
db 142
Live	1.92884e+07	0	0	0	N/A	160886	488.116	103.333	1023	1.53548e+09	187.894	6.01765	16224.2	621.435	458.333	813.667	1.97134e+08	61.0446	1.65708	0.100843	µm	RGB	0.0680672
Live	1.9294e+07	0	0	0	N/A	160886	498.415	122.333	1023	1.56788e+09	204.68	5.59016	15494.1	621.057	454.333	814	1.88148e+08	61.3882	1.65638	0.096305	µm	RGB
Live	1.93034e+07	0	0	0	N/A	160886	521.514	107.667	1023	1640539668	240.976	6.05325	13229.2	626.191	452	814	161972940	66.5847	1.70168	0.082227	µm	RGB
Live	1.93078e+07	0	0	0	N/A	160886	464.701	129.333	1023	1.46182e+09	182.102	5.06436	6739.2	630.8	439.333	813.667	8.31192e+07	69.2462	1.70947	0.041888	µm	RGB
Live	1.93138e+07	0	0	0	N/A	160886	517.472	134.333	1023	1.62783e+09	165.307	4.67123	6214.46	629.943	476.333	813.667	7.65431e+07	63.3818	1.6303	0.038626	µm	RGB
Live	1.93198e+07	0	0	0	N/A	160886	465.326	89.3333	1023	1.46379e+09	211.929	5.35602	7805.25	613.571	448.333	814	93638320	72.75	1.72436	0.048514	µm	RGB
db 140
Live	1.9372e+07	0	0	0	N/A	160886	561.917	142	1023	1.76764e+09	179.123	4.65	13852.6	628.681	460	814	1.7028e+08	62.957	1.65714	0.086102	µm	RGB	0.0607093
Live	1.93779e+07	0	0	0	N/A	160886	542.421	117	1023	1.70631e+09	161.116	4.15854	20071.1	629.586	469.333	814.333	2.47075e+08	60.2942	1.63158	0.124753	µm	RGB
Live	1.93876e+07	0	0	0	N/A	160886	559.025	137.333	1023	1.75854e+09	184.438	4.52655	6340.68	632.41	465	813.667	7.84036e+07	64.0653	1.6551	0.039411	µm	RGB
Live	1.9394e+07	0	0	0	N/A	160886	538.265	96.3333	1023	1693233792	183.228	5.35602	3776.91	626.301	469	814	4.62511e+07	60.3161	1.72281	0.023476	µm	RGB
Live	1.94003e+07	0	0	0	N/A	160886	560.924	102	1023	1764513660	174.005	4.28034	6069.41	629.313	464.333	814.333	7.46818e+07	62.434	1.63434	0.037725	µm	RGB
Live	1.94082e+07	0	0	0	N/A	160886	536.445	141	1023	1687510860	170.682	4.125	8493.04	640.603	463	814.333	106378612	67.9069	1.67217	0.052789	µm	RGB
db 139	???
Live	1.94458e+07	0	0	0	N/A	160886	555.987	39	1023	1.74898e+09	176.716	4.42857	5716.1	614.991	484	813.667	6.87339e+07	45.8784	1.57422	0.035529	µm	RGB	0.0297575
Live	1.9451e+07	0	0	0	N/A	160886	616.676	183.333	1023	1.9399e+09	188.484	4.0757	6538.71	611.932	485	812.333	7.82342e+07	39.756	1.60843	0.040642	µm	RGB
Live	1.94596e+07	0	0	0	N/A	160886	574.025	199.333	1023	1.80573e+09	180.93	3.86038	1923.64	613.811	503.333	812	23086652	45.1584	1.54703	0.011957	µm	RGB
Live	1.94689e+07	0	0	0	N/A	160886	582.573	234.667	1023	1.83262e+09	162.542	2.93123	631.531	622.369	491.667	808.333	7685008	49.3466	1.64562	0.003925	µm	RGB
Live	1.94764e+07	0	0	0	N/A	160886	531.049	116	1023	1.67054e+09	223.637	4.84834	4507.05	626.798	456.667	811	5.5236e+07	61.3085	1.67427	0.028014	µm	RGB
Live	1.9482e+07	0	0	0	N/A	160886	550.386	160.667	1023	1.73136e+09	182.575	4.69266	9408.32	619.221	466	813.667	1.13909e+08	50.4947	1.65914	0.058478	µm	RGB
db 138
Live	1.95517e+07	0	0	0	N/A	160886	527.815	119	1023	1660363628	144.043	4.60811	6596.61	615.495	457.333	813.667	7.93866e+07	54.6268	1.62097	0.041002	µm	RGB	0.0364125
Live	1.9558e+07	0	0	0	N/A	160886	525.504	169.667	1023	1.65309e+09	145.359	3.93461	4807.37	615.149	477.333	812.667	5.78215e+07	53.9789	1.61245	0.029881	µm	RGB
Live	1.95636e+07	0	0	0	N/A	160886	523.678	129.333	1023	1647349964	147.759	4.29832	6369.93	626.166	467	814.333	77987724	62.4692	1.64766	0.039593	µm	RGB
Live	1.95726e+07	0	0	0	N/A	160886	479.759	119.667	1023	1.50919e+09	168.201	4.62896	5475.11	629.022	469	814	6.73381e+07	65.5708	1.64694	0.034031	µm	RGB
Live	1.95789e+07	0	0	0	N/A	160886	506.21	112.667	1023	1592397520	197.358	5.32812	5555.1	629.084	454.333	812.667	68328604	64.9323	1.70825	0.034528	µm	RGB
Live	1.95852e+07	0	0	0	N/A	160886	543.729	98	1023	1.71042e+09	201.22	4.65	6345.39	632.425	452.667	814.333	78463756	66.046	1.69167	0.03944	µm	RGB
db 137
Live	1.96322e+07	0	0	0	N/A	160886	488.535	86.6667	1023	1.5368e+09	243.48	7.46715	7477.52	624.547	436.333	814	9.13112e+07	65.9554	1.68125	0.046477	µm	RGB	0.0596778
Live	1.96389e+07	0	0	0	N/A	160886	522.418	44.6667	1023	1.64338e+09	225.099	6.35404	7363.16	640.435	439.333	814.333	9.22021e+07	71.0226	1.65849	0.045766	µm	RGB
Live	1.96453e+07	0	0	0	N/A	160886	595.008	146.667	1023	1.87173e+09	205.087	4.2625	9460.49	636.567	452	814	1.1775e+08	69.2657	1.66872	0.058802	µm	RGB
Live	1.9652e+07	0	0	0	N/A	160886	507.131	82.3333	1023	1.59529e+09	270.141	7.99219	13447.7	620.029	442.333	814	1.63028e+08	76.6209	1.75108	0.083585	µm	RGB
Live	1.96587e+07	0	0	0	N/A	160886	584.901	77.3333	1023	1839939576	302.276	8.45454	10339.8	631.209	440.667	814	1.2761e+08	76.9308	1.74409	0.064267	µm	RGB
Live	1.96684e+07	0	0	0	N/A	160886	536.196	127	1023	1.68673e+09	222.983	5.52973	9519.61	633.957	454.667	814	117999764	70.847	1.69247	0.05917	µm	RGB
db 136
Live	1.97117e+07	0	0	0	N/A	160886	552.404	112.333	1023	1.73771e+09	236.301	5.59016	7571.01	613.26	457.667	814.333	9.07821e+07	57.0458	1.67917	0.047058	µm	RGB	0.0241965
Live	1.97172e+07	0	0	0	N/A	160886	513.34	115.667	1023	1614826656	193.926	6.73026	5094.19	619.418	465	813.333	61696520	57.0268	1.68894	0.031663	µm	RGB
Live	1.97232e+07	0	0	0	N/A	160886	588.666	90	1023	1.85178e+09	268.177	6.6	4597.68	614.036	446	813	55199392	56.0592	1.73548	0.028577	µm	RGB
Live	1.97284e+07	0	0	0	N/A	160886	519.003	128	1023	1.63264e+09	126.585	4.87143	1939.81	611.108	459.667	811.667	2.31781e+07	48.7569	1.63838	0.012057	µm	RGB
Live	1.97355e+07	0	0	0	N/A	160886	512.898	123.333	1023	1.61344e+09	143.71	5.21939	2817.44	611.69	460.667	810.667	3.36968e+07	49.5457	1.63469	0.017512	µm	RGB
Live	1.97419e+07	0	0	0	N/A	160886	514.99	118.667	1023	1.62002e+09	143.244	4.35319	1337.32	624.598	472	810.667	1.6332e+07	58.7901	1.70975	0.008312	µm	RGB
db 124
Live	1.97874e+07	0	0	0	N/A	160886	627.468	181.667	1023	1.97384e+09	212.181	3.66667	6256.6	645.932	471	813.667	7.90182e+07	61.807	1.64694	0.038888	µm	RGB	0.0180835
Live	1.97922e+07	0	0	0	N/A	160886	556.68	197.333	1023	1.75116e+09	171.321	3.77491	2116.97	638.444	471.333	811.667	2.64265e+07	63.4726	1.63765	0.013158	µm	RGB
Live	1.97978e+07	0	0	0	N/A	160886	518.872	167.333	1023	1.63223e+09	152.809	3.67986	2728.45	629.791	484.667	814	3.35981e+07	56.1554	1.63636	0.016959	µm	RGB
Live	1.98034e+07	0	0	0	N/A	160886	548.268	181	1023	1.7247e+09	162.734	3.62766	2250.76	636.314	469	813	2.80029e+07	61.596	1.64373	0.01399	µm	RGB
Live	1.98134e+07	0	0	0	N/A	160886	506.358	204.667	1023	1592864764	122.585	3.39867	871.092	630.802	487.667	812	1.07438e+07	59.3717	1.61034	0.005414	µm	RGB
Live	1.9819e+07	0	0	0	N/A	160886	517.525	160.333	1023	1.62799e+09	138.614	3.91954	3232.53	624.579	477.667	813.667	39475872	53.1084	1.59841	0.020092	µm	RGB
db 122
Live	1.98862e+07	0	0	0	N/A	160886	472.266	131.667	1023	1485620504	174.023	4.62896	10760.2	637.59	464.333	814	134141236	66.3986	1.70021	0.066881	µm	RGB	0.0229078
Live	1.98936e+07	0	0	0	N/A	160886	475.255	127.667	1023	1495022728	178.964	5.115	2668.72	632.494	466	814	3.30035e+07	60.6402	1.67495	0.016588	µm	RGB
Live	1.99003e+07	0	0	0	N/A	160886	469.735	123.667	1023	1477657040	214.858	5.71508	2226.62	631.601	455.333	813.333	2.74974e+07	64.6298	1.74464	0.01384	µm	RGB
Live	1.99059e+07	0	0	0	N/A	160886	487.511	147.333	1023	1.53358e+09	188.338	4.67123	2491.76	632.893	490	813.667	30834556	62.7353	1.62702	0.015488	µm	RGB
Live	1.99126e+07	0	0	0	N/A	160886	493.95	105.333	1023	1553831064	252.551	6.08929	2983.36	630.928	446.333	814	3.68033e+07	63.4551	1.6736	0.018543	µm	RGB
Live	1.99201e+07	0	0	0	N/A	160886	468.912	131	1023	1475071108	189.191	4.94203	982.587	625.083	464.667	809.667	12009096	58.4815	1.7265	0.006107	µm	RGB
db 114
Live	2.05514e+07	0	0	0	N/A	160886	580.991	60	1023	1827640780	299.374	6.05325	12713.3	615.844	441	814	1.53084e+08	79.9602	1.77802	0.07902	µm	RGB	0.128353
Live	2.05611e+07	0	0	0	N/A	160886	530.368	119	1023	1.66839e+09	184.862	4.54667	26739.5	634.261	437	814.333	3.31607e+08	76.1313	1.73605	0.166201	µm	RGB
Live	2.05685e+07	0	0	0	N/A	160886	589.722	113.667	1023	1.85511e+09	236.295	5.59016	55869.1	614.72	426.667	814.333	6.71508e+08	81.6905	1.77802	0.347258	µm	RGB
Live	2.05775e+07	0	0	0	N/A	160886	453.562	121	1023	1426783972	159.916	5.71508	3167.27	624.656	473	811.333	3.86837e+07	59.5268	1.65708	0.019686	µm	RGB
Live	2.05827e+07	0	0	0	N/A	160886	485.999	126.667	1023	1.52882e+09	210.904	5.19289	10349.2	624.807	449.667	814	1.26431e+08	71.01	1.75108	0.064326	µm	RGB
Live	2.05905e+07	0	0	0	N/A	160886	451.251	171.667	1023	1.41951e+09	168.219	4.71429	15062.8	618.651	432.667	814.333	182202520	70.8027	1.7587	0.093624	µm	RGB
db 113
Live	2.06319e+07	0	0	0	N/A	160886	470.15	68	1023	1.47896e+09	177.249	5.59016	42326.1	606.01	441	814	5.01522e+08	78.0286	1.74298	0.263081	µm	RGB	0.135557
Live	2.06416e+07	0	0	0	N/A	160886	475.189	73.6667	1023	1.49481e+09	191.421	5.77966	30846	612.646	438	814.333	369496504	78.9788	1.74353	0.191725	µm	RGB
Live	2.06517e+07	0	0	0	N/A	160886	497.747	78.6667	1023	1565775544	188.196	4.48684	3673.19	623.891	488.667	813.333	44807828	57.8211	1.61431	0.022831	µm	RGB
Live	2.06599e+07	0	0	0	N/A	160886	497.475	154	1023	1.56492e+09	178.621	4.52655	31835.1	610.066	440.333	814.333	3.79739e+08	68.7015	1.71855	0.197873	µm	RGB
Live	2.06681e+07	0	0	0	N/A	160886	459.327	39.6667	1023	1.44492e+09	179.855	4.87143	3380.24	615.552	492.333	811.667	4.06831e+07	48.9953	1.57455	0.02101	µm	RGB
Live	2.06804e+07	0	0	0	N/A	160886	495.946	33.6667	1023	1.56011e+09	256.891	6.95918	18794.8	605.468	429.333	813.667	2.225e+08	79.5198	1.78982	0.11682	µm	RGB
db 49
Live	2.07143e+07	0	0	0	N/A	160886	525.696	95.3333	1023	1653696100	182.407	5.16667	17876.6	652.186	447.667	814	2.2796e+08	62.4384	1.65779	0.111113	µm	RGB	0.0674303
Live	2.07248e+07	0	0	0	N/A	160886	516.65	127	1023	1625240736	159.671	4.75814	6395.71	632.312	451.333	814.333	7.90719e+07	54.9752	1.71036	0.039753	µm	RGB
Live	2.07322e+07	0	0	0	N/A	160886	592.019	119.667	1023	1.86233e+09	183.405	4.91827	11200.8	642.027	464.333	814	1.40606e+08	61.9003	1.69038	0.069619	µm	RGB
Live	2.07449e+07	0	0	0	N/A	160886	517.506	117.333	1023	1.62793e+09	192.343	4.24481	5713.85	638.598	458.667	813	7.13441e+07	57.5815	1.68829	0.035515	µm	RGB
Live	2.07542e+07	0	0	0	N/A	160886	508.067	110.333	1023	1.59824e+09	233.651	5.84571	5127.13	628.665	442	812.667	6.30224e+07	60.8104	1.74249	0.031868	µm	RGB
Live	2.07602e+07	0	0	0	N/A	160886	524.567	92.6667	1023	1.65015e+09	173.72	5.21939	18777.8	654.858	441	814.333	2.40433e+08	62.1214	1.67983	0.116714	µm	RGB
db 111
Live	2.07982e+07	0	0	0	N/A	160886	466.841	98	1023	1468555640	175.145	6.39375	22466.7	598.491	439.333	813.667	2.62905e+08	80.1819	1.77582	0.139643	µm	RGB	0.144915
Live	2.08057e+07	0	0	0	N/A	160886	448.788	114.333	1023	1411765236	168.991	5.84571	29931.6	599.699	433	814.333	3.50966e+08	82.2842	1.78194	0.186042	µm	RGB
Live	2.08142e+07	0	0	0	N/A	160886	417.668	97.6667	1023	1313868576	147.526	7.20423	15008.8	593.191	429.333	814	174077864	77.4235	1.78761	0.093288	µm	RGB
Live	2.08195e+07	0	0	0	N/A	160886	426.263	86.3333	1023	1.34091e+09	167.322	7.30714	22134.7	595.388	433	814	2.57677e+08	79.9403	1.78366	0.13758	µm	RGB
Live	2.08273e+07	0	0	0	N/A	160886	481.494	103.667	1023	1514649392	212.185	7.15385	35172.4	604.442	428	814.333	4.1568e+08	85.6936	1.79778	0.218616	µm	RGB
Live	2.08333e+07	0	0	0	N/A	160886	406.734	87	1023	1279476012	189.846	7.15385	15175.4	591.021	434.333	814	175365412	78.9127	1.8009	0.094323	µm	RGB
db 106
Live	2.08747e+07	0	0	0	N/A	160886	605.744	71	1023	1.90551e+09	230.949	6.05325	30745.4	638.374	456	814.333	3.83757e+08	77.5992	1.70526	0.1911	µm	RGB	0.0619027
Live	2.08836e+07	0	0	0	N/A	160886	485.589	89.6667	1023	1.52753e+09	145.661	6.01765	5798.34	621.918	455.667	813	70508084	59.2441	1.69328	0.03604	µm	RGB
Live	2.08922e+07	0	0	0	N/A	160886	450.887	93	1023	1.41837e+09	116.375	5.9	7353.75	611.47	451.333	813	87919644	59.7782	1.70378	0.045708	µm	RGB
Live	2.08981e+07	0	0	0	N/A	160886	458.438	102	1023	1.44212e+09	160.761	5.44149	5869.74	629.977	458	814	72301248	67.2388	1.72708	0.036484	µm	RGB
Live	2.09064e+07	0	0	0	N/A	160886	489.22	65	1023	1.53895e+09	161.684	4.91827	6202.79	629.412	448.667	814	7.63351e+07	63.1872	1.73605	0.038554	µm	RGB
Live	2.09179e+07	0	0	0	N/A	160886	495.58	67.6667	1023	1.55896e+09	182.829	5.38421	3785.71	636.612	465.333	812.333	4.7122e+07	66.8425	1.66392	0.02353	µm	RGB
db 102
Live	2.10171e+07	0	0	0	N/A	160886	626.119	101.333	1023	1.9696e+09	246.754	6.01765	8063.43	643.815	440.333	814	1.01504e+08	69.1653	1.72187	0.050119	µm	RGB	0.0413503
Live	2.10249e+07	0	0	0	N/A	160886	599.351	109	1023	1.8854e+09	233.587	5.8125	6269.28	634.774	445.667	813.667	7.78106e+07	64.3157	1.68399	0.038967	µm	RGB
Live	2.1038e+07	0	0	0	N/A	160886	617.388	179.333	1023	1942133808	182.85	4.02756	4156	612.511	485.667	810.333	49772608	42.1268	1.59959	0.025832	µm	RGB
Live	2.10458e+07	0	0	0	N/A	160886	617.144	111.333	1023	1.94137e+09	214.367	5.16667	6877.49	633.644	450	814.333	8.52073e+07	62.923	1.68894	0.042747	µm	RGB
Live	2.10682e+07	0	0	0	N/A	160886	622.354	115	1023	1957755652	209.073	5.21939	7003.92	626.662	444.333	813.667	8.58176e+07	57.6795	1.66874	0.043533	µm	RGB
Live	2.10831e+07	0	0	0	N/A	160886	615.671	109.333	1023	1.93673e+09	259.058	5.68333	7546.26	638.001	449.333	814.333	94135832	63.3194	1.72128	0.046904	µm	RGB
db 57
Live	2.1129e+07	0	0	0	N/A	160886	426.398	84.3333	1023	1341331236	186.394	7.15385	10317.7	628.409	451	813.667	126772736	63.5314	1.72009	0.06413	µm	RGB	0.034696
Live	2.11513e+07	0	0	0	N/A	160886	413.93	87.6667	1023	1302111400	177.197	6.2378	3732.72	637.264	440.333	814.333	4.65101e+07	67.4115	1.71762	0.023201	µm	RGB
Live	2.11573e+07	0	0	0	N/A	160886	410.985	87.3333	1023	1.29285e+09	187.329	6.95918	4332.96	639.778	451.667	814.333	54202020	69.6621	1.69665	0.026932	µm	RGB
Live	2.11629e+07	0	0	0	N/A	160886	438.198	111.667	1023	1.37845e+09	212.214	6.31482	6331.88	641.319	460	813	79397868	72.1113	1.7382	0.039356	µm	RGB
Live	2.11733e+07	0	0	0	N/A	160886	402.414	99	1023	1.26589e+09	165.371	6.35404	3739.88	628.232	440.333	814.333	45938812	59.861	1.77704	0.023245	µm	RGB
Live	2.11875e+07	0	0	0	N/A	160886	417.559	94.3333	1023	1.31353e+09	208.102	6.35404	5037.73	630.458	452	814	6.21001e+07	68.7157	1.7473	0.031312	µm	RGB
db 56
Live	2.1217e+07	0	0	0	N/A	160886	517.457	94.6667	1023	1.62778e+09	202.553	6.01765	8695.57	631.445	455	813.667	1.07358e+08	62.2464	1.67288	0.054048	µm	RGB	0.144267
Live	2.12263e+07	0	0	0	N/A	160886	520.855	108.667	1023	1638468736	218.813	6.35404	28817.4	629.846	438	814.333	3.54888e+08	80.9865	1.78808	0.179117	µm	RGB
Live	2.12319e+07	0	0	0	N/A	160886	469.341	97	1023	1476418544	164.448	6.51592	11012.8	629.805	468.667	813.333	135614644	58.5368	1.68333	0.068451	µm	RGB
Live	2.12405e+07	0	0	0	N/A	160886	704.396	96.3333	1023	2.21584e+09	268.487	5.01471	27390.1	611.664	430.333	813.667	3.27573e+08	72.1396	1.78492	0.170245	µm	RGB
Live	2.12513e+07	0	0	0	N/A	160886	526.085	101.667	1023	1.65492e+09	222.821	6.43396	20592.6	627.313	437.667	814.333	252578800	74.5644	1.75271	0.127995	µm	RGB
Live	2.12621e+07	0	0	0	N/A	160886	649.899	128.667	1023	2044406460	214.841	4.91827	42755.3	652.244	451	814.333	5.45257e+08	68.0823	1.68894	0.265748	µm	RGB

## Sheet: mortality data
Updated sheet with bruce and sonu data
ID	Time in days	DBC SHAM	DBC RAS	DB SHAM	DB RAS
db-51	42			0
db-52	42			0
db-53	42			0
db-54	42			0
db-55	42			0
db-21	23			0
db-22	23			0
db-23	23			0
db-24	23			0
db-25	23			0
db-26	15			0
db-27	15			0
db-28	15			0
db-29	15			0
db-30	15			0
db-115	116			0
db-116	116			0
db-117	116			0
db-119	117			0
db-120	117			0
db-107	42			0
db-108	42			0
db-109	42			0
db-146	7			0
db-147	7			0
db-148	7			0
db-149	7			0
db-150	7			0
db-164	14			0
db-161	14			0
db-165	14			0
db-01	18				0
db-02	3				1
db-03	17				0
db-04	17				0
db-05	17				0
db-06	4				1
db-07	16				0
db-08	16				0
db-09	16				0
db-10	7				1
db-11	1				1
db-12	28				0
db-13	28				1
db-14	28				0
db-15	40				1
db-16	28				0
db-17	0				0
db-18	28				0
db-19	28				0
db-20	28				0
db-41	42				0
db-42	42				0
db-43	42				0
db-44	42				0
db-45	42				0
db-46	42				0
db-47	42				0
db-48	42				0
db-49	42				0
db-50	42				0
db-56	90				1
db-57	104				1
db-104	7				1
db-111	116				0
db-112	116				0
db-113	116				0
db-114	116				0
db-122	117				1
db-123	61				1
db-124	117				0
db-101	42				0
db-102	5				1
db-105	5				1
db-106	42				0
db-136	6				0
db-137	6				0
db-138	6				0
db-139	6				0
db-140	6				0
db-141	3				1
db-142	7				0
db-143	7				0
db-144	7				0
db-145	7				0
db-151	14				0
db-152	14				1
db-153	14				0
db-154	14				0
db-155	14				0
db-156	14				0
db-157	14				0
db-158	14				0
db-159	14				0
db-160	14				0
3d-10	3	0
7d-02	7	0
7d-04	7	0
7d-06	7	0
7d-08	7	0
7d-10	7	0
3d-01	3	0
3d-03	3	0
3d-06	3	0
3d-08	3	0
dbc-21	23	0
dbc-22	23	0
dbc-23	23	0
dbc-24	23	0
dbc-25	23	0
dbc-26	15	0
dbc-27	15	0
dbc-28	15	0
dbc-29	15	0
dbc-30	15	0
dbc-51	42	0
dbc-52	42	0
dbc-53	42	0
dbc-54	42	0
dbc-55	42	0
dbc-111	117	0
dbc-112	117	0
dbc-113	117	0
dbc-115	117	0
dbc-141	8	0
dbc-142	8	0
dbc-143	8	0
dbc-144	8	0
dbc-145	8	0
dbc-161	3	0
dbc-162	3	0
dbc-163	3	0
dbc-164	3	0
dbc-165	3	0
dbc-184	3	0
dbc-185	3	0
dbc-41	42		0
dbc-42	42		0
dbc-43	42		0
dbc-44	42		0
dbc-45	42		0
dbc-46	42		0
dbc-47	42		0
dbc-48	42		0
dbc-49	42		0
dbc-50	42		0
dbc-117	116		0
dbc-118	116		0
dbc-119	116		0
dbc-121	119		0
dbc-122	119		0
dbc-123	119		0
dbc-124	119		0
dbc-136	3		0
dbc-137	3		0
dbc-138	3		0
dbc-139	3		0
dbc-140	3		0
dbc-146	7		0
dbc-147	7		0
dbc-150	7		0
dbc-151	7		0
dbc-152	7		0
dbc-153	7		0
dbc-154	7		0
dbc-155	6		0
dbc-156	3		0
dbc-157	3		0
dbc-158	3		0
dbc-159	3		0
dbc-160	3		0
dbc-181	3		0
dbc-182	3		0
dbc-183	3		0
dbc-02	N/A		0
dbc-01	18		0
dbc-03	18		0
dbc-04	9		1
dbc-05	18		0
dbc-06	14		0
dbc-07	14		0
dbc-08	14		0
dbc-09	14		0
dbc-10	14		0
dbc-11	28		0
dbc-12	28		0
dbc-13	28		0
dbc-14	28		0
dbc-15	28		0
dbc-16	26		0
dbc-17	26		0
dbc-18	26		0
dbc-19	26		0
dbc-20	26		0
3d-04	3		0
3d-05	0		0
3d-02	3		0
7d-09	7		0
7d-07	7		0
7d-05	7		0
7d-03	7		0
7d-01	7		0
3d-07	3		0
3d-09	3		0
Total		0	1	0	15
		DBC SHAM	DBC RAS	DB SHAM	DB RAS

## Sheet: Length
Item	Source	Length	ND.T	ND.Z	ND.M	Time	Velocity	Comment
1	Live	36.69	N/A	N/A	N/A	N/A	N/A	dbc165a
2	Live	58.54	N/A	N/A	N/A	N/A	N/A
3	Live	49.6	N/A	N/A	N/A	N/A	N/A
4	Live	45.02	N/A	N/A	N/A	N/A	N/A
5	Live	56.54	N/A	N/A	N/A	N/A	N/A
6	Live	48.67	N/A	N/A	N/A	N/A	N/A
7	Live	41.56	N/A	N/A	N/A	N/A	N/A
8	Live	35.08	N/A	N/A	N/A	N/A	N/A
Feature	Mean	St.Dev	Minimum	Maximum
Length	46.46	8.01	35.08	58.54
Time	N/A	N/A	N/A	N/A
Velocity	N/A	N/A	N/A	N/A
Item	Source	Length	ND.T	ND.Z	ND.M	Time	Velocity	Comment
1	Live	62.92	N/A	N/A	N/A	N/A	N/A	dbc 41
2	Live	54.08	N/A	N/A	N/A	N/A	N/A
3	Live	61.89	N/A	N/A	N/A	N/A	N/A
4	Live	58.66	N/A	N/A	N/A	N/A	N/A
5	Live	65.2	N/A	N/A	N/A	N/A	N/A
6	Live	53.27	N/A	N/A	N/A	N/A	N/A
7	Live	50.44	N/A	N/A	N/A	N/A	N/A
8	Live	64.35	N/A	N/A	N/A	N/A	N/A
Feature	Mean	St.Dev	Minimum	Maximum
Length	58.85	5.26	50.44	65.2
Time	N/A	N/A	N/A	N/A
Velocity	N/A	N/A	N/A	N/A
Item	Source	Length	ND.T	ND.Z	ND.M	Time	Velocity	Comment
1	Live	60.86	N/A	N/A	N/A	N/A	N/A	dbc 42
2	Live	58.44	N/A	N/A	N/A	N/A	N/A
3	Live	59.74	N/A	N/A	N/A	N/A	N/A
4	Live	74.54	N/A	N/A	N/A	N/A	N/A
5	Live	81.72	N/A	N/A	N/A	N/A	N/A
6	Live	61.7	N/A	N/A	N/A	N/A	N/A
7	Live	60.95	N/A	N/A	N/A	N/A	N/A
8	Live	59.69	N/A	N/A	N/A	N/A	N/A
Feature	Mean	St.Dev	Minimum	Maximum
Length	64.71	8.01	58.44	81.72
Time	N/A	N/A	N/A	N/A
Velocity	N/A	N/A	N/A	N/A
Item	Source	Length	ND.T	ND.Z	ND.M	Time	Velocity	Comment
1	Live	88.32	N/A	N/A	N/A	N/A	N/A	dbc 43
2	Live	78.36	N/A	N/A	N/A	N/A	N/A
3	Live	85.33	N/A	N/A	N/A	N/A	N/A
4	Live	123.94	N/A	N/A	N/A	N/A	N/A
5	Live	76.86	N/A	N/A	N/A	N/A	N/A
6	Live	90.43	N/A	N/A	N/A	N/A	N/A
7	Live	107.11	N/A	N/A	N/A	N/A	N/A
8	Live	72.31	N/A	N/A	N/A	N/A	N/A
Feature	Mean	St.Dev	Minimum	Maximum
Length	90.33	16.16	72.31	123.94
Time	N/A	N/A	N/A	N/A
Velocity	N/A	N/A	N/A	N/A
Item	Source	Length	ND.T	ND.Z	ND.M	Time	Velocity	Comment
1	Live	65.13	N/A	N/A	N/A	N/A	N/A	dbc44
2	Live	63.6	N/A	N/A	N/A	N/A	N/A
3	Live	70.71	N/A	N/A	N/A	N/A	N/A
4	Live	71.95	N/A	N/A	N/A	N/A	N/A
5	Live	67.22	N/A	N/A	N/A	N/A	N/A
6	Live	63.99	N/A	N/A	N/A	N/A	N/A
7	Live	77.36	N/A	N/A	N/A	N/A	N/A
8	Live	57.77	N/A	N/A	N/A	N/A	N/A
Feature	Mean	St.Dev	Minimum	Maximum
Length	67.22	5.64	57.77	77.36
Time	N/A	N/A	N/A	N/A
Velocity	N/A	N/A	N/A	N/A
Item	Source	Length	ND.T	ND.Z	ND.M	Time	Velocity	Comment
1	Live	63.68	N/A	N/A	N/A	N/A	N/A	dbc45
2	Live	66.02	N/A	N/A	N/A	N/A	N/A
3	Live	52.43	N/A	N/A	N/A	N/A	N/A
4	Live	71.75	N/A	N/A	N/A	N/A	N/A
5	Live	78.18	N/A	N/A	N/A	N/A	N/A
6	Live	82.04	N/A	N/A	N/A	N/A	N/A
7	Live	79.87	N/A	N/A	N/A	N/A	N/A
8	Live	89.35	N/A	N/A	N/A	N/A	N/A
Feature	Mean	St.Dev	Minimum	Maximum
Length	72.91	11.09	52.43	89.35
Time	N/A	N/A	N/A	N/A
Velocity	N/A	N/A	N/A	N/A
Item	Source	Length	ND.T	ND.Z	ND.M	Time	Velocity	Comment
1	Live	47.51	N/A	N/A	N/A	N/A	N/A	dbc83
2	Live	51.03	N/A	N/A	N/A	N/A	N/A
3	Live	55.18	N/A	N/A	N/A	N/A	N/A
4	Live	45.02	N/A	N/A	N/A	N/A	N/A
5	Live	56.46	N/A	N/A	N/A	N/A	N/A
6	Live	56.58	N/A	N/A	N/A	N/A	N/A
7	Live	51.72	N/A	N/A	N/A	N/A	N/A
8	Live	41.37	N/A	N/A	N/A	N/A	N/A
Feature	Mean	St.Dev	Minimum	Maximum
Length	50.61	5.23	41.37	56.58
Time	N/A	N/A	N/A	N/A
Velocity	N/A	N/A	N/A	N/A
Item	Source	Length	ND.T	ND.Z	ND.M	Time	Velocity	Comment
1	Live	63.06	N/A	N/A	N/A	N/A	N/A	dbc85
2	Live	73.98	N/A	N/A	N/A	N/A	N/A
3	Live	64.96	N/A	N/A	N/A	N/A	N/A
4	Live	77.54	N/A	N/A	N/A	N/A	N/A
5	Live	82.61	N/A	N/A	N/A	N/A	N/A
6	Live	69.1	N/A	N/A	N/A	N/A	N/A
7	Live	106.62	N/A	N/A	N/A	N/A	N/A
8	Live	86.01	N/A	N/A	N/A	N/A	N/A
Feature	Mean	St.Dev	Minimum	Maximum
Length	77.99	13.2	63.06	106.62
Time	N/A	N/A	N/A	N/A
Velocity	N/A	N/A	N/A	N/A
Item	Source	Length	ND.T	ND.Z	ND.M	Time	Velocity	Comment
1	Live	67.69	N/A	N/A	N/A	N/A	N/A	dbc 82
2	Live	63.25	N/A	N/A	N/A	N/A	N/A
3	Live	55.84	N/A	N/A	N/A	N/A	N/A
4	Live	80.35	N/A	N/A	N/A	N/A	N/A
5	Live	59.69	N/A	N/A	N/A	N/A	N/A
6	Live	63.79	N/A	N/A	N/A	N/A	N/A
7	Live	70.67	N/A	N/A	N/A	N/A	N/A
8	Live	78.7	N/A	N/A	N/A	N/A	N/A
Feature	Mean	St.Dev	Minimum	Maximum
Length	67.5	8.13	55.84	80.35
Time	N/A	N/A	N/A	N/A
Velocity	N/A	N/A	N/A	N/A
Item	Source	Length	ND.T	ND.Z	ND.M	Time	Velocity	Comment
1	Live	58.49	N/A	N/A	N/A	N/A	N/A	164a
2	Live	46.37	N/A	N/A	N/A	N/A	N/A
3	Live	56.07	N/A	N/A	N/A	N/A	N/A
4	Live	62.51	N/A	N/A	N/A	N/A	N/A
5	Live	55.55	N/A	N/A	N/A	N/A	N/A
6	Live	63.6	N/A	N/A	N/A	N/A	N/A
7	Live	78.67	N/A	N/A	N/A	N/A	N/A
8	Live	71.95	N/A	N/A	N/A	N/A	N/A
Feature	Mean	St.Dev	Minimum	Maximum
Length	61.65	9.44	46.37	78.67
Time	N/A	N/A	N/A	N/A
Velocity	N/A	N/A	N/A	N/A
Item	Source	Length	ND.T	ND.Z	ND.M	Time	Velocity	Comment
1	Live	65.15	N/A	N/A	N/A	N/A	N/A	161a
2	Live	64.21	N/A	N/A	N/A	N/A	N/A
3	Live	78.99	N/A	N/A	N/A	N/A	N/A
4	Live	60.07	N/A	N/A	N/A	N/A	N/A
5	Live	67.03	N/A	N/A	N/A	N/A	N/A
6	Live	65.38	N/A	N/A	N/A	N/A	N/A
7	Live	35.54	N/A	N/A	N/A	N/A	N/A
8	Live	69.12	N/A	N/A	N/A	N/A	N/A
Feature	Mean	St.Dev	Minimum	Maximum
Length	63.19	11.64	35.54	78.99
Time	N/A	N/A	N/A	N/A
Velocity	N/A	N/A	N/A	N/A
Item	Source	Length	ND.T	ND.Z	ND.M	Time	Velocity	Comment
1	Live	26.94	N/A	N/A	N/A	N/A	N/A	dbc165
2	Live	42.17	N/A	N/A	N/A	N/A	N/A
3	Live	49.97	N/A	N/A	N/A	N/A	N/A
4	Live	36.03	N/A	N/A	N/A	N/A	N/A
5	Live	55.11	N/A	N/A	N/A	N/A	N/A
6	Live	42.59	N/A	N/A	N/A	N/A	N/A
7	Live	53.43	N/A	N/A	N/A	N/A	N/A
8	Live	47.06	N/A	N/A	N/A	N/A	N/A
Feature	Mean	St.Dev	Minimum	Maximum
Length	44.16	8.78	26.94	55.11
Time	N/A	N/A	N/A	N/A
Velocity	N/A	N/A	N/A	N/A
Item	Source	Length	ND.T	ND.Z	ND.M	Time	Velocity	Comment
1	Live	54.13	N/A	N/A	N/A	N/A	N/A	dbc 164
2	Live	50.43	N/A	N/A	N/A	N/A	N/A
3	Live	36.03	N/A	N/A	N/A	N/A	N/A
4	Live	52.45	N/A	N/A	N/A	N/A	N/A
5	Live	40.9	N/A	N/A	N/A	N/A	N/A
6	Live	47.15	N/A	N/A	N/A	N/A	N/A
7	Live	46.47	N/A	N/A	N/A	N/A	N/A
8	Live	50.26	N/A	N/A	N/A	N/A	N/A
Feature	Mean	St.Dev	Minimum	Maximum
Length	47.23	5.7	36.03	54.13
Time	N/A	N/A	N/A	N/A
Velocity	N/A	N/A	N/A	N/A
Item	Source	Length	ND.T	ND.Z	ND.M	Time	Velocity	Comment
1	Live	39.79	N/A	N/A	N/A	N/A	N/A	dbc 163
2	Live	36.09	N/A	N/A	N/A	N/A	N/A
3	Live	48.08	N/A	N/A	N/A	N/A	N/A
4	Live	32.46	N/A	N/A	N/A	N/A	N/A
5	Live	28.7	N/A	N/A	N/A	N/A	N/A
6	Live	48.41	N/A	N/A	N/A	N/A	N/A
7	Live	32.93	N/A	N/A	N/A	N/A	N/A
8	Live	31.78	N/A	N/A	N/A	N/A	N/A
Feature	Mean	St.Dev	Minimum	Maximum
Length	37.28	7.02	28.7	48.41
Time	N/A	N/A	N/A	N/A
Velocity	N/A	N/A	N/A	N/A
Item	Source	Length	ND.T	ND.Z	ND.M	Time	Velocity	Comment
1	Live	39.11	N/A	N/A	N/A	N/A	N/A	dbc 162
2	Live	47.15	N/A	N/A	N/A	N/A	N/A
3	Live	30.78	N/A	N/A	N/A	N/A	N/A
4	Live	32.01	N/A	N/A	N/A	N/A	N/A
5	Live	41.88	N/A	N/A	N/A	N/A	N/A
6	Live	41.21	N/A	N/A	N/A	N/A	N/A
7	Live	37.75	N/A	N/A	N/A	N/A	N/A
8	Live	32.48	N/A	N/A	N/A	N/A	N/A
Feature	Mean	St.Dev	Minimum	Maximum
Length	37.8	5.34	30.78	47.15
Time	N/A	N/A	N/A	N/A
Velocity	N/A	N/A	N/A	N/A
Item	Source	Length	ND.T	ND.Z	ND.M	Time	Velocity	Comment
1	Live	58.84	N/A	N/A	N/A	N/A	N/A	dbc 161
2	Live	49.36	N/A	N/A	N/A	N/A	N/A
3	Live	35.27	N/A	N/A	N/A	N/A	N/A
4	Live	48.86	N/A	N/A	N/A	N/A	N/A
5	Live	39.39	N/A	N/A	N/A	N/A	N/A
6	Live	42.17	N/A	N/A	N/A	N/A	N/A
7	Live	57.56	N/A	N/A	N/A	N/A	N/A
8	Live	48.61	N/A	N/A	N/A	N/A	N/A
Feature	Mean	St.Dev	Minimum	Maximum
Length	47.51	7.75	35.27	58.84
Time	N/A	N/A	N/A	N/A
Velocity	N/A	N/A	N/A	N/A
Item	Source	Length	ND.T	ND.Z	ND.M	Time	Velocity	Comment
1	Live	37.98	N/A	N/A	N/A	N/A	N/A	dbc 160
2	Live	57.4	N/A	N/A	N/A	N/A	N/A
3	Live	34.29	N/A	N/A	N/A	N/A	N/A
4	Live	49.42	N/A	N/A	N/A	N/A	N/A
5	Live	43.98	N/A	N/A	N/A	N/A	N/A
6	Live	58.24	N/A	N/A	N/A	N/A	N/A
7	Live	58.66	N/A	N/A	N/A	N/A	N/A
8	Live	44.44	N/A	N/A	N/A	N/A	N/A
Feature	Mean	St.Dev	Minimum	Maximum
Length	48.05	8.85	34.29	58.66
Time	N/A	N/A	N/A	N/A
Velocity	N/A	N/A	N/A	N/A
Item	Source	Length	ND.T	ND.Z	ND.M	Time	Velocity	Comment
1	Live	74.44	N/A	N/A	N/A	N/A	N/A	dbc 159
2	Live	77.62	N/A	N/A	N/A	N/A	N/A
3	Live	56.98	N/A	N/A	N/A	N/A	N/A
4	Live	80.23	N/A	N/A	N/A	N/A	N/A
5	Live	59.64	N/A	N/A	N/A	N/A	N/A
6	Live	50.88	N/A	N/A	N/A	N/A	N/A
7	Live	50.92	N/A	N/A	N/A	N/A	N/A
8	Live	49.22	N/A	N/A	N/A	N/A	N/A
Feature	Mean	St.Dev	Minimum	Maximum
Length	62.49	12.09	49.22	80.23
Time	N/A	N/A	N/A	N/A
Velocity	N/A	N/A	N/A	N/A
Item	Source	Length	ND.T	ND.Z	ND.M	Time	Velocity	Comment
1	Live	55.42	N/A	N/A	N/A	N/A	N/A	dbc 158
2	Live	40.48	N/A	N/A	N/A	N/A	N/A
3	Live	41.49	N/A	N/A	N/A	N/A	N/A
4	Live	43.81	N/A	N/A	N/A	N/A	N/A
5	Live	55.36	N/A	N/A	N/A	N/A	N/A
6	Live	32.18	N/A	N/A	N/A	N/A	N/A
7	Live	38.39	N/A	N/A	N/A	N/A	N/A
8	Live	39.87	N/A	N/A	N/A	N/A	N/A
Feature	Mean	St.Dev	Minimum	Maximum
Length	43.37	7.61	32.18	55.42
Time	N/A	N/A	N/A	N/A
Velocity	N/A	N/A	N/A	N/A
Item	Source	Length	ND.T	ND.Z	ND.M	Time	Velocity	Comment
1	Live	55.7	N/A	N/A	N/A	N/A	N/A	dbc 157
2	Live	42.02	N/A	N/A	N/A	N/A	N/A
3	Live	40.76	N/A	N/A	N/A	N/A	N/A
4	Live	42.18	N/A	N/A	N/A	N/A	N/A
5	Live	46.26	N/A	N/A	N/A	N/A	N/A
6	Live	41.64	N/A	N/A	N/A	N/A	N/A
7	Live	49.53	N/A	N/A	N/A	N/A	N/A
8	Live	30.03	N/A	N/A	N/A	N/A	N/A
Feature	Mean	St.Dev	Minimum	Maximum
Length	43.51	6.98	30.03	55.7
Time	N/A	N/A	N/A	N/A
Velocity	N/A	N/A	N/A	N/A
Item	Source	Length	ND.T	ND.Z	ND.M	Time	Velocity	Comment
1	Live	37.15	N/A	N/A	N/A	N/A	N/A	dbc 156
2	Live	42.36	N/A	N/A	N/A	N/A	N/A
3	Live	33.25	N/A	N/A	N/A	N/A	N/A
4	Live	33.33	N/A	N/A	N/A	N/A	N/A
5	Live	33.57	N/A	N/A	N/A	N/A	N/A
6	Live	50.84	N/A	N/A	N/A	N/A	N/A
7	Live	56.98	N/A	N/A	N/A	N/A	N/A
8	Live	54.11	N/A	N/A	N/A	N/A	N/A
Feature	Mean	St.Dev	Minimum	Maximum
Length	42.7	9.3	33.25	56.98
Time	N/A	N/A	N/A	N/A
Velocity	N/A	N/A	N/A	N/A
Item	Source	Length	ND.T	ND.Z	ND.M	Time	Velocity	Comment
1	Live	82.16	N/A	N/A	N/A	N/A	N/A	dbc 155
2	Live	75.07	N/A	N/A	N/A	N/A	N/A
3	Live	69.85	N/A	N/A	N/A	N/A	N/A
4	Live	54.2	N/A	N/A	N/A	N/A	N/A
5	Live	91.51	N/A	N/A	N/A	N/A	N/A
6	Live	73.43	N/A	N/A	N/A	N/A	N/A
7	Live	63.68	N/A	N/A	N/A	N/A	N/A
8	Live	92.52	N/A	N/A	N/A	N/A	N/A
Feature	Mean	St.Dev	Minimum	Maximum
Length	75.3	12.35	54.2	92.52
Time	N/A	N/A	N/A	N/A
Velocity	N/A	N/A	N/A	N/A
Item	Source	Length	ND.T	ND.Z	ND.M	Time	Velocity	Comment
1	Live	96.78	N/A	N/A	N/A	N/A	N/A	dbc 154
2	Live	94.04	N/A	N/A	N/A	N/A	N/A
3	Live	93.41	N/A	N/A	N/A	N/A	N/A
4	Live	85.97	N/A	N/A	N/A	N/A	N/A
5	Live	91.54	N/A	N/A	N/A	N/A	N/A
6	Live	93.4	N/A	N/A	N/A	N/A	N/A
7	Live	95.92	N/A	N/A	N/A	N/A	N/A
8	Live	72.62	N/A	N/A	N/A	N/A	N/A
Feature	Mean	St.Dev	Minimum	Maximum
Length	90.46	7.41	72.62	96.78
Time	N/A	N/A	N/A	N/A
Velocity	N/A	N/A	N/A	N/A
Item	Source	Length	ND.T	ND.Z	ND.M	Time	Velocity	Comment
1	Live	69.33	N/A	N/A	N/A	N/A	N/A	dbc 153
2	Live	85.79	N/A	N/A	N/A	N/A	N/A
3	Live	113.75	N/A	N/A	N/A	N/A	N/A
4	Live	93.26	N/A	N/A	N/A	N/A	N/A
5	Live	72.17	N/A	N/A	N/A	N/A	N/A
6	Live	80.18	N/A	N/A	N/A	N/A	N/A
7	Live	81.06	N/A	N/A	N/A	N/A	N/A
8	Live	99.49	N/A	N/A	N/A	N/A	N/A
Feature	Mean	St.Dev	Minimum	Maximum
Length	86.88	13.81	69.33	113.75
Time	N/A	N/A	N/A	N/A
Velocity	N/A	N/A	N/A	N/A
Item	Source	Length	ND.T	ND.Z	ND.M	Time	Velocity	Comment
1	Live	91.49	N/A	N/A	N/A	N/A	N/A	dbc 152
2	Live	58.36	N/A	N/A	N/A	N/A	N/A
3	Live	68.68	N/A	N/A	N/A	N/A	N/A
4	Live	97.72	N/A	N/A	N/A	N/A	N/A
5	Live	66.05	N/A	N/A	N/A	N/A	N/A
6	Live	78.37	N/A	N/A	N/A	N/A	N/A
7	Live	70.19	N/A	N/A	N/A	N/A	N/A
8	Live	76.16	N/A	N/A	N/A	N/A	N/A
Feature	Mean	St.Dev	Minimum	Maximum
Length	75.88	12.32	58.36	97.72
Time	N/A	N/A	N/A	N/A
Velocity	N/A	N/A	N/A	N/A
Item	Source	Length	ND.T	ND.Z	ND.M	Time	Velocity	Comment
1	Live	67.56	N/A	N/A	N/A	N/A	N/A	dbc 150
2	Live	77.68	N/A	N/A	N/A	N/A	N/A
3	Live	73.15	N/A	N/A	N/A	N/A	N/A
4	Live	79.57	N/A	N/A	N/A	N/A	N/A
5	Live	63.51	N/A	N/A	N/A	N/A	N/A
6	Live	68.13	N/A	N/A	N/A	N/A	N/A
7	Live	104.18	N/A	N/A	N/A	N/A	N/A
8	Live	83.89	N/A	N/A	N/A	N/A	N/A
Feature	Mean	St.Dev	Minimum	Maximum
Length	77.21	12.03	63.51	104.18
Time	N/A	N/A	N/A	N/A
Velocity	N/A	N/A	N/A	N/A
Item	Source	Length	ND.T	ND.Z	ND.M	Time	Velocity	Comment
1	Live	91.16	N/A	N/A	N/A	N/A	N/A	dbc 146
2	Live	100.31	N/A	N/A	N/A	N/A	N/A
3	Live	91.76	N/A	N/A	N/A	N/A	N/A
4	Live	77.19	N/A	N/A	N/A	N/A	N/A
5	Live	71.07	N/A	N/A	N/A	N/A	N/A
6	Live	78.05	N/A	N/A	N/A	N/A	N/A
7	Live	74.81	N/A	N/A	N/A	N/A	N/A
8	Live	67.86	N/A	N/A	N/A	N/A	N/A
Feature	Mean	St.Dev	Minimum	Maximum
Length	81.53	10.74	67.86	100.31
Time	N/A	N/A	N/A	N/A
Velocity	N/A	N/A	N/A	N/A
Item	Source	Length	ND.T	ND.Z	ND.M	Time	Velocity	Comment
1	Live	54.81	N/A	N/A	N/A	N/A	N/A	dbc 145
2	Live	50.84	N/A	N/A	N/A	N/A	N/A
3	Live	58.9	N/A	N/A	N/A	N/A	N/A
4	Live	60.91	N/A	N/A	N/A	N/A	N/A
5	Live	51.09	N/A	N/A	N/A	N/A	N/A
6	Live	56.81	N/A	N/A	N/A	N/A	N/A
7	Live	50.39	N/A	N/A	N/A	N/A	N/A
8	Live	58.36	N/A	N/A	N/A	N/A	N/A
Feature	Mean	St.Dev	Minimum	Maximum
Length	55.26	3.84	50.39	60.91
Time	N/A	N/A	N/A	N/A
Velocity	N/A	N/A	N/A	N/A
Item	Source	Length	ND.T	ND.Z	ND.M	Time	Velocity	Comment
1	Live	63.38	N/A	N/A	N/A	N/A	N/A	dbc 144
2	Live	63.07	N/A	N/A	N/A	N/A	N/A
3	Live	53.32	N/A	N/A	N/A	N/A	N/A
4	Live	64.45	N/A	N/A	N/A	N/A	N/A
5	Live	91.1	N/A	N/A	N/A	N/A	N/A
6	Live	58.53	N/A	N/A	N/A	N/A	N/A
7	Live	59.81	N/A	N/A	N/A	N/A	N/A
8	Live	68.12	N/A	N/A	N/A	N/A	N/A
Feature	Mean	St.Dev	Minimum	Maximum
Length	65.22	10.62	53.32	91.1
Time	N/A	N/A	N/A	N/A
Velocity	N/A	N/A	N/A	N/A
Item	Source	Length	ND.T	ND.Z	ND.M	Time	Velocity	Comment
1	Live	48.4	N/A	N/A	N/A	N/A	N/A	dbc 143
2	Live	59.81	N/A	N/A	N/A	N/A	N/A
3	Live	68.12	N/A	N/A	N/A	N/A	N/A
4	Live	50.39	N/A	N/A	N/A	N/A	N/A
5	Live	55.32	N/A	N/A	N/A	N/A	N/A
6	Live	48.91	N/A	N/A	N/A	N/A	N/A
7	Live	52.61	N/A	N/A	N/A	N/A	N/A
8	Live	59.65	N/A	N/A	N/A	N/A	N/A
Feature	Mean	St.Dev	Minimum	Maximum
Length	55.4	6.36	48.4	68.12
Time	N/A	N/A	N/A	N/A
Velocity	N/A	N/A	N/A	N/A
Item	Source	Length	ND.T	ND.Z	ND.M	Time	Velocity	Comment
1	Live	48.17	N/A	N/A	N/A	N/A	N/A	dbc 142
2	Live	47.28	N/A	N/A	N/A	N/A	N/A
3	Live	49.74	N/A	N/A	N/A	N/A	N/A
4	Live	41.65	N/A	N/A	N/A	N/A	N/A
5	Live	43.77	N/A	N/A	N/A	N/A	N/A
6	Live	52.36	N/A	N/A	N/A	N/A	N/A
7	Live	46.85	N/A	N/A	N/A	N/A	N/A
8	Live	46.4	N/A	N/A	N/A	N/A	N/A
Feature	Mean	St.Dev	Minimum	Maximum
Length	47.03	3.1	41.65	52.36
Time	N/A	N/A	N/A	N/A
Velocity	N/A	N/A	N/A	N/A
Item	Source	Length	ND.T	ND.Z	ND.M	Time	Velocity	Comment
1	Live	38.8	N/A	N/A	N/A	N/A	N/A	dbc 141
2	Live	51.87	N/A	N/A	N/A	N/A	N/A
3	Live	42.3	N/A	N/A	N/A	N/A	N/A
4	Live	61.98	N/A	N/A	N/A	N/A	N/A
5	Live	47.28	N/A	N/A	N/A	N/A	N/A
6	Live	51.63	N/A	N/A	N/A	N/A	N/A
7	Live	45.97	N/A	N/A	N/A	N/A	N/A
8	Live	50.78	N/A	N/A	N/A	N/A	N/A
Feature	Mean	St.Dev	Minimum	Maximum
Length	48.83	6.59	38.8	61.98
Time	N/A	N/A	N/A	N/A
Velocity	N/A	N/A	N/A	N/A
Item	Source	Length	ND.T	ND.Z	ND.M	Time	Velocity	Comment
1	Live	45.24	N/A	N/A	N/A	N/A	N/A	dbc 140
2	Live	38.28	N/A	N/A	N/A	N/A	N/A
3	Live	51.25	N/A	N/A	N/A	N/A	N/A
4	Live	35.76	N/A	N/A	N/A	N/A	N/A
5	Live	43.42	N/A	N/A	N/A	N/A	N/A
6	Live	36.17	N/A	N/A	N/A	N/A	N/A
7	Live	36.03	N/A	N/A	N/A	N/A	N/A
8	Live	46.85	N/A	N/A	N/A	N/A	N/A
Feature	Mean	St.Dev	Minimum	Maximum
Length	41.62	5.51	35.76	51.25
Time	N/A	N/A	N/A	N/A
Velocity	N/A	N/A	N/A	N/A
Item	Source	Length	ND.T	ND.Z	ND.M	Time	Velocity	Comment
1	Live	66.25	N/A	N/A	N/A	N/A	N/A	dbc 139
2	Live	56.37	N/A	N/A	N/A	N/A	N/A
3	Live	64.46	N/A	N/A	N/A	N/A	N/A
4	Live	51.81	N/A	N/A	N/A	N/A	N/A
5	Live	69.96	N/A	N/A	N/A	N/A	N/A
6	Live	49.36	N/A	N/A	N/A	N/A	N/A
7	Live	51.09	N/A	N/A	N/A	N/A	N/A
8	Live	57.17	N/A	N/A	N/A	N/A	N/A
Feature	Mean	St.Dev	Minimum	Maximum
Length	58.31	7.21	49.36	69.96
Time	N/A	N/A	N/A	N/A
Velocity	N/A	N/A	N/A	N/A
Item	Source	Length	ND.T	ND.Z	ND.M	Time	Velocity	Comment
1	Live	52.75	N/A	N/A	N/A	N/A	N/A	dbc 138
2	Live	70.86	N/A	N/A	N/A	N/A	N/A
3	Live	49.48	N/A	N/A	N/A	N/A	N/A
4	Live	57.44	N/A	N/A	N/A	N/A	N/A
5	Live	60.9	N/A	N/A	N/A	N/A	N/A
6	Live	43.09	N/A	N/A	N/A	N/A	N/A
7	Live	62.26	N/A	N/A	N/A	N/A	N/A
8	Live	43.07	N/A	N/A	N/A	N/A	N/A
Feature	Mean	St.Dev	Minimum	Maximum
Length	54.98	9.12	43.07	70.86
Time	N/A	N/A	N/A	N/A
Velocity	N/A	N/A	N/A	N/A
Item	Source	Length	ND.T	ND.Z	ND.M	Time	Velocity	Comment
1	Live	61.41	N/A	N/A	N/A	N/A	N/A	dbc 137
2	Live	40.57	N/A	N/A	N/A	N/A	N/A
3	Live	55.55	N/A	N/A	N/A	N/A	N/A
4	Live	59.65	N/A	N/A	N/A	N/A	N/A
5	Live	46.99	N/A	N/A	N/A	N/A	N/A
6	Live	50.85	N/A	N/A	N/A	N/A	N/A
7	Live	54.39	N/A	N/A	N/A	N/A	N/A
8	Live	45.24	N/A	N/A	N/A	N/A	N/A
Feature	Mean	St.Dev	Minimum	Maximum
Length	51.83	6.78	40.57	61.41
Time	N/A	N/A	N/A	N/A
Velocity	N/A	N/A	N/A	N/A
Item	Source	Length	ND.T	ND.Z	ND.M	Time	Velocity	Comment
1	Live	52.54	N/A	N/A	N/A	N/A	N/A	dbc 136
2	Live	43.89	N/A	N/A	N/A	N/A	N/A
3	Live	68.98	N/A	N/A	N/A	N/A	N/A
4	Live	61.8	N/A	N/A	N/A	N/A	N/A
5	Live	58.56	N/A	N/A	N/A	N/A	N/A
6	Live	61.56	N/A	N/A	N/A	N/A	N/A
7	Live	54.96	N/A	N/A	N/A	N/A	N/A
8	Live	41.64	N/A	N/A	N/A	N/A	N/A
Feature	Mean	St.Dev	Minimum	Maximum
Length	55.49	8.69	41.64	68.98
Time	N/A	N/A	N/A	N/A
Velocity	N/A	N/A	N/A	N/A
Item	Source	Length	ND.T	ND.Z	ND.M	Time	Velocity	Comment
1	Live	70.1	N/A	N/A	N/A	N/A	N/A	dbc 124
2	Live	64.96	N/A	N/A	N/A	N/A	N/A
3	Live	66.89	N/A	N/A	N/A	N/A	N/A
4	Live	52.41	N/A	N/A	N/A	N/A	N/A
5	Live	73.73	N/A	N/A	N/A	N/A	N/A
6	Live	42.38	N/A	N/A	N/A	N/A	N/A
7	Live	51.32	N/A	N/A	N/A	N/A	N/A
8	Live	58.09	N/A	N/A	N/A	N/A	N/A
Feature	Mean	St.Dev	Minimum	Maximum
Length	59.98	10.06	42.38	73.73
Time	N/A	N/A	N/A	N/A
Velocity	N/A	N/A	N/A	N/A
Item	Source	Length	ND.T	ND.Z	ND.M	Time	Velocity	Comment
1	Live	49.03	N/A	N/A	N/A	N/A	N/A	dbc 123
2	Live	67.09	N/A	N/A	N/A	N/A	N/A
3	Live	34.02	N/A	N/A	N/A	N/A	N/A
4	Live	35.34	N/A	N/A	N/A	N/A	N/A
5	Live	45.6	N/A	N/A	N/A	N/A	N/A
6	Live	62.96	N/A	N/A	N/A	N/A	N/A
7	Live	66.43	N/A	N/A	N/A	N/A	N/A
8	Live	46.9	N/A	N/A	N/A	N/A	N/A
Feature	Mean	St.Dev	Minimum	Maximum
Length	50.92	12.37	34.02	67.09
Time	N/A	N/A	N/A	N/A
Velocity	N/A	N/A	N/A	N/A
Item	Source	Length	ND.T	ND.Z	ND.M	Time	Velocity	Comment
1	Live	76.17	N/A	N/A	N/A	N/A	N/A	dbc 46
2	Live	46.59	N/A	N/A	N/A	N/A	N/A
3	Live	57.93	N/A	N/A	N/A	N/A	N/A
4	Live	56.95	N/A	N/A	N/A	N/A	N/A
5	Live	56.77	N/A	N/A	N/A	N/A	N/A
6	Live	78.97	N/A	N/A	N/A	N/A	N/A
7	Live	86.68	N/A	N/A	N/A	N/A	N/A
8	Live	41.27	N/A	N/A	N/A	N/A	N/A
Feature	Mean	St.Dev	Minimum	Maximum
Length	62.67	15.13	41.27	86.68
Time	N/A	N/A	N/A	N/A
Velocity	N/A	N/A	N/A	N/A
Item	Source	Length	ND.T	ND.Z	ND.M	Time	Velocity	Comment
1	Live	61.93	N/A	N/A	N/A	N/A	N/A	dbc 47
2	Live	72.1	N/A	N/A	N/A	N/A	N/A
3	Live	76.55	N/A	N/A	N/A	N/A	N/A
4	Live	72.73	N/A	N/A	N/A	N/A	N/A
5	Live	70.82	N/A	N/A	N/A	N/A	N/A
6	Live	70.1	N/A	N/A	N/A	N/A	N/A
7	Live	67.75	N/A	N/A	N/A	N/A	N/A
8	Live	70.98	N/A	N/A	N/A	N/A	N/A
Feature	Mean	St.Dev	Minimum	Maximum
Length	70.37	3.96	61.93	76.55
Time	N/A	N/A	N/A	N/A
Velocity	N/A	N/A	N/A	N/A
Item	Source	Length	ND.T	ND.Z	ND.M	Time	Velocity	Comment
1	Live	70.86	N/A	N/A	N/A	N/A	N/A	dbc 49
2	Live	51.87	N/A	N/A	N/A	N/A	N/A
3	Live	48.86	N/A	N/A	N/A	N/A	N/A
4	Live	66.8	N/A	N/A	N/A	N/A	N/A
5	Live	52.36	N/A	N/A	N/A	N/A	N/A
6	Live	62.53	N/A	N/A	N/A	N/A	N/A
7	Live	59.81	N/A	N/A	N/A	N/A	N/A
8	Live	75.47	N/A	N/A	N/A	N/A	N/A
Feature	Mean	St.Dev	Minimum	Maximum
Length	61.07	9.01	48.86	75.47
Time	N/A	N/A	N/A	N/A
Velocity	N/A	N/A	N/A	N/A
Item	Source	Length	ND.T	ND.Z	ND.M	Time	Velocity	Comment
1	Live	106.5	N/A	N/A	N/A	N/A	N/A	dbc 147
2	Live	102.44	N/A	N/A	N/A	N/A	N/A
3	Live	79.68	N/A	N/A	N/A	N/A	N/A
4	Live	94.02	N/A	N/A	N/A	N/A	N/A
5	Live	102.89	N/A	N/A	N/A	N/A	N/A
6	Live	110.33	N/A	N/A	N/A	N/A	N/A
7	Live	105.97	N/A	N/A	N/A	N/A	N/A
8	Live	111.98	N/A	N/A	N/A	N/A	N/A
Feature	Mean	St.Dev	Minimum	Maximum
Length	101.73	9.8	79.68	111.98
Time	N/A	N/A	N/A	N/A
Velocity	N/A	N/A	N/A	N/A
Item	Source	Length	ND.T	ND.Z	ND.M	Time	Velocity	Comment
1	Live	80.19	N/A	N/A	N/A	N/A	N/A	dbc 122
2	Live	90.09	N/A	N/A	N/A	N/A	N/A
3	Live	66.92	N/A	N/A	N/A	N/A	N/A
4	Live	80.88	N/A	N/A	N/A	N/A	N/A
5	Live	77.59	N/A	N/A	N/A	N/A	N/A
6	Live	70.7	N/A	N/A	N/A	N/A	N/A
7	Live	69.26	N/A	N/A	N/A	N/A	N/A
8	Live	71.98	N/A	N/A	N/A	N/A	N/A
Feature	Mean	St.Dev	Minimum	Maximum
Length	75.95	7.2	66.92	90.09
Time	N/A	N/A	N/A	N/A
Velocity	N/A	N/A	N/A	N/A
Item	Source	Length	ND.T	ND.Z	ND.M	Time	Velocity	Comment
1	Live	47.63	N/A	N/A	N/A	N/A	N/A	dbc 48
2	Live	43.76	N/A	N/A	N/A	N/A	N/A
3	Live	63.72	N/A	N/A	N/A	N/A	N/A
4	Live	77.83	N/A	N/A	N/A	N/A	N/A
5	Live	58.94	N/A	N/A	N/A	N/A	N/A
6	Live	61.09	N/A	N/A	N/A	N/A	N/A
7	Live	61.43	N/A	N/A	N/A	N/A	N/A
8	Live	71.02	N/A	N/A	N/A	N/A	N/A
Feature	Mean	St.Dev	Minimum	Maximum
Length	60.68	10.43	43.76	77.83
Time	N/A	N/A	N/A	N/A
Velocity	N/A	N/A	N/A	N/A
Item	Source	Length	ND.T	ND.Z	ND.M	Time	Velocity	Comment
1	Live	86.09	N/A	N/A	N/A	N/A	N/A	dbc 50
2	Live	94.43	N/A	N/A	N/A	N/A	N/A
3	Live	71.46	N/A	N/A	N/A	N/A	N/A
4	Live	101.21	N/A	N/A	N/A	N/A	N/A
5	Live	89.82	N/A	N/A	N/A	N/A	N/A
6	Live	114.55	N/A	N/A	N/A	N/A	N/A
7	Live	76.98	N/A	N/A	N/A	N/A	N/A
8	Live	81.83	N/A	N/A	N/A	N/A	N/A
Feature	Mean	St.Dev	Minimum	Maximum
Length	89.55	12.95	71.46	114.55
Time	N/A	N/A	N/A	N/A
Velocity	N/A	N/A	N/A	N/A
Item	Source	Length	ND.T	ND.Z	ND.M	Time	Velocity	Comment
1	Live	82.72	N/A	N/A	N/A	N/A	N/A	dbc 151
2	Live	85.03	N/A	N/A	N/A	N/A	N/A
3	Live	83.92	N/A	N/A	N/A	N/A	N/A
4	Live	73.7	N/A	N/A	N/A	N/A	N/A
5	Live	73.77	N/A	N/A	N/A	N/A	N/A
6	Live	75.99	N/A	N/A	N/A	N/A	N/A
7	Live	93.79	N/A	N/A	N/A	N/A	N/A
8	Live	78.75	N/A	N/A	N/A	N/A	N/A
Feature	Mean	St.Dev	Minimum	Maximum
Length	80.96	6.4	73.7	93.79
Time	N/A	N/A	N/A	N/A
Velocity	N/A	N/A	N/A	N/A
Item	Source	Length	ND.T	ND.Z	ND.M	Time	Velocity	Comment
1	Live	65.71	N/A	N/A	N/A	N/A	N/A	dbc 121
2	Live	77.06	N/A	N/A	N/A	N/A	N/A
3	Live	87.24	N/A	N/A	N/A	N/A	N/A
4	Live	99.82	N/A	N/A	N/A	N/A	N/A
5	Live	88.86	N/A	N/A	N/A	N/A	N/A
6	Live	91.37	N/A	N/A	N/A	N/A	N/A
7	Live	62.71	N/A	N/A	N/A	N/A	N/A
8	Live	92.96	N/A	N/A	N/A	N/A	N/A
Feature	Mean	St.Dev	Minimum	Maximum
Length	83.22	12.5	62.71	99.82
Time	N/A	N/A	N/A	N/A
Velocity	N/A	N/A	N/A	N/A
Item	Source	Length	ND.T	ND.Z	ND.M	Time	Velocity	Comment
1	Live	83.89	N/A	N/A	N/A	N/A	N/A	dbc 119
2	Live	62.39	N/A	N/A	N/A	N/A	N/A
3	Live	64.7	N/A	N/A	N/A	N/A	N/A
4	Live	59.17	N/A	N/A	N/A	N/A	N/A
5	Live	59.57	N/A	N/A	N/A	N/A	N/A
6	Live	58.56	N/A	N/A	N/A	N/A	N/A
7	Live	67.48	N/A	N/A	N/A	N/A	N/A
8	Live	72.31	N/A	N/A	N/A	N/A	N/A
Feature	Mean	St.Dev	Minimum	Maximum
Length	66.01	8.06	58.56	83.89
Time	N/A	N/A	N/A	N/A
Velocity	N/A	N/A	N/A	N/A
Item	Source	Length	ND.T	ND.Z	ND.M	Time	Velocity	Comment
1	Live	46.71	N/A	N/A	N/A	N/A	N/A	dbc 118
2	Live	69.3	N/A	N/A	N/A	N/A	N/A
3	Live	76.92	N/A	N/A	N/A	N/A	N/A
4	Live	89.46	N/A	N/A	N/A	N/A	N/A
5	Live	73.99	N/A	N/A	N/A	N/A	N/A
6	Live	85.17	N/A	N/A	N/A	N/A	N/A
7	Live	60.9	N/A	N/A	N/A	N/A	N/A
8	Live	84.38	N/A	N/A	N/A	N/A	N/A
Feature	Mean	St.Dev	Minimum	Maximum
Length	73.35	13.3	46.71	89.46
Time	N/A	N/A	N/A	N/A
Velocity	N/A	N/A	N/A	N/A
Item	Source	Length	ND.T	ND.Z	ND.M	Time	Velocity	Comment
1	Live	57.77	N/A	N/A	N/A	N/A	N/A	dbc 117
2	Live	56.25	N/A	N/A	N/A	N/A	N/A
3	Live	63.02	N/A	N/A	N/A	N/A	N/A
4	Live	62.87	N/A	N/A	N/A	N/A	N/A
5	Live	66.38	N/A	N/A	N/A	N/A	N/A
6	Live	72.16	N/A	N/A	N/A	N/A	N/A
7	Live	63.54	N/A	N/A	N/A	N/A	N/A
8	Live	51.18	N/A	N/A	N/A	N/A	N/A
Feature	Mean	St.Dev	Minimum	Maximum
Length	61.65	6.06	51.18	72.16
Time	N/A	N/A	N/A	N/A
Velocity	N/A	N/A	N/A	N/A
Item	Source	Length	ND.T	ND.Z	ND.M	Time	Velocity	Comment
1	Live	62.86	N/A	N/A	N/A	N/A	N/A	dbc 51
2	Live	56.41	N/A	N/A	N/A	N/A	N/A
3	Live	36.91	N/A	N/A	N/A	N/A	N/A
4	Live	32	N/A	N/A	N/A	N/A	N/A
5	Live	35.2	N/A	N/A	N/A	N/A	N/A
6	Live	30.69	N/A	N/A	N/A	N/A	N/A
7	Live	49.8	N/A	N/A	N/A	N/A	N/A
8	Live	51.41	N/A	N/A	N/A	N/A	N/A
Feature	Mean	St.Dev	Minimum	Maximum
Length	44.41	11.44	30.69	62.86
Time	N/A	N/A	N/A	N/A
Velocity	N/A	N/A	N/A	N/A
Item	Source	Length	ND.T	ND.Z	ND.M	Time	Velocity	Comment
1	Live	54.33	N/A	N/A	N/A	N/A	N/A	dbc 52
2	Live	56.29	N/A	N/A	N/A	N/A	N/A
3	Live	57.05	N/A	N/A	N/A	N/A	N/A
4	Live	44.84	N/A	N/A	N/A	N/A	N/A
5	Live	63.24	N/A	N/A	N/A	N/A	N/A
6	Live	49.22	N/A	N/A	N/A	N/A	N/A
7	Live	59.95	N/A	N/A	N/A	N/A	N/A
8	Live	45.37	N/A	N/A	N/A	N/A	N/A
Feature	Mean	St.Dev	Minimum	Maximum
Length	53.78	6.29	44.84	63.24
Time	N/A	N/A	N/A	N/A
Velocity	N/A	N/A	N/A	N/A
Item	Source	Length	ND.T	ND.Z	ND.M	Time	Velocity	Comment
1	Live	126.64	N/A	N/A	N/A	N/A	N/A	dbc 54
2	Live	80.13	N/A	N/A	N/A	N/A	N/A
3	Live	56.27	N/A	N/A	N/A	N/A	N/A
4	Live	90.25	N/A	N/A	N/A	N/A	N/A
5	Live	152.53	N/A	N/A	N/A	N/A	N/A
6	Live	114.06	N/A	N/A	N/A	N/A	N/A
7	Live	73	N/A	N/A	N/A	N/A	N/A
8	Live	66.98	N/A	N/A	N/A	N/A	N/A
Feature	Mean	St.Dev	Minimum	Maximum
Length	94.98	31	56.27	152.53
Time	N/A	N/A	N/A	N/A
Velocity	N/A	N/A	N/A	N/A
Item	Source	Length	ND.T	ND.Z	ND.M	Time	Velocity	Comment
1	Live	40.48	N/A	N/A	N/A	N/A	N/A	dbc 55
2	Live	59.31	N/A	N/A	N/A	N/A	N/A
3	Live	42.29	N/A	N/A	N/A	N/A	N/A
4	Live	46.72	N/A	N/A	N/A	N/A	N/A
5	Live	65.73	N/A	N/A	N/A	N/A	N/A
6	Live	51.63	N/A	N/A	N/A	N/A	N/A
7	Live	64.63	N/A	N/A	N/A	N/A	N/A
8	Live	45.88	N/A	N/A	N/A	N/A	N/A
Feature	Mean	St.Dev	Minimum	Maximum
Length	52.08	9.31	40.48	65.73
Time	N/A	N/A	N/A	N/A
Velocity	N/A	N/A	N/A	N/A
Item	Source	Length	ND.T	ND.Z	ND.M	Time	Velocity	Comment
1	Live	56.65	N/A	N/A	N/A	N/A	N/A	dbc 115
2	Live	95.34	N/A	N/A	N/A	N/A	N/A
3	Live	48.19	N/A	N/A	N/A	N/A	N/A
4	Live	75.16	N/A	N/A	N/A	N/A	N/A
5	Live	51.54	N/A	N/A	N/A	N/A	N/A
6	Live	71.53	N/A	N/A	N/A	N/A	N/A
7	Live	72.32	N/A	N/A	N/A	N/A	N/A
8	Live	57.33	N/A	N/A	N/A	N/A	N/A
Feature	Mean	St.Dev	Minimum	Maximum
Length	66.01	14.6	48.19	95.34
Time	N/A	N/A	N/A	N/A
Velocity	N/A	N/A	N/A	N/A
Item	Source	Length	ND.T	ND.Z	ND.M	Time	Velocity	Comment
1	Live	63.78	N/A	N/A	N/A	N/A	N/A	dbc 113
2	Live	95.42	N/A	N/A	N/A	N/A	N/A
3	Live	47.34	N/A	N/A	N/A	N/A	N/A
4	Live	40.78	N/A	N/A	N/A	N/A	N/A
5	Live	62.33	N/A	N/A	N/A	N/A	N/A
6	Live	81.76	N/A	N/A	N/A	N/A	N/A
7	Live	60.35	N/A	N/A	N/A	N/A	N/A
8	Live	43.37	N/A	N/A	N/A	N/A	N/A
Feature	Mean	St.Dev	Minimum	Maximum
Length	61.89	17.77	40.78	95.42
Time	N/A	N/A	N/A	N/A
Velocity	N/A	N/A	N/A	N/A
Item	Source	Length	ND.T	ND.Z	ND.M	Time	Velocity	Comment
1	Live	46.21	N/A	N/A	N/A	N/A	N/A	dbc 112
2	Live	51.29	N/A	N/A	N/A	N/A	N/A
3	Live	49.91	N/A	N/A	N/A	N/A	N/A
4	Live	54.8	N/A	N/A	N/A	N/A	N/A
5	Live	48.83	N/A	N/A	N/A	N/A	N/A
6	Live	46.01	N/A	N/A	N/A	N/A	N/A
7	Live	41.21	N/A	N/A	N/A	N/A	N/A
8	Live	50.05	N/A	N/A	N/A	N/A	N/A
Feature	Mean	St.Dev	Minimum	Maximum
Length	48.54	3.82	41.21	54.8
Time	N/A	N/A	N/A	N/A
Velocity	N/A	N/A	N/A	N/A
Item	Source	Length	ND.T	ND.Z	ND.M	Time	Velocity	Comment
1	Live	50.66	N/A	N/A	N/A	N/A	N/A	dbc 111
2	Live	30.52	N/A	N/A	N/A	N/A	N/A
3	Live	46.82	N/A	N/A	N/A	N/A	N/A
4	Live	38.56	N/A	N/A	N/A	N/A	N/A
5	Live	62.38	N/A	N/A	N/A	N/A	N/A
6	Live	51.33	N/A	N/A	N/A	N/A	N/A
7	Live	37.13	N/A	N/A	N/A	N/A	N/A
8	Live	59.31	N/A	N/A	N/A	N/A	N/A
Feature	Mean	St.Dev	Minimum	Maximum
Length	47.09	10.37	30.52	62.38
Time	N/A	N/A	N/A	N/A						1	Live	118.63	N/A	N/A	N/A	N/A	N/A	db 55
Velocity	N/A	N/A	N/A	N/A						2	Live	117.43	N/A	N/A	N/A	N/A	N/A
Item	Source	Length	ND.T	ND.Z	ND.M	Time	Velocity	Comment		3	Live	124.77	N/A	N/A	N/A	N/A	N/A
1	Live	51.38	N/A	N/A	N/A	N/A	N/A	db 51		4	Live	126.53	N/A	N/A	N/A	N/A	N/A
2	Live	86.78	N/A	N/A	N/A	N/A	N/A			5	Live	90.82	N/A	N/A	N/A	N/A	N/A
3	Live	71.59	N/A	N/A	N/A	N/A	N/A			6	Live	113.38	N/A	N/A	N/A	N/A	N/A
4	Live	87.93	N/A	N/A	N/A	N/A	N/A			7	Live	81.63	N/A	N/A	N/A	N/A	N/A
5	Live	101.89	N/A	N/A	N/A	N/A	N/A			8	Live	97.15	N/A	N/A	N/A	N/A	N/A
6	Live	72.1	N/A	N/A	N/A	N/A	N/A			Feature	Mean	St.Dev	Minimum	Maximum
7	Live	64.3	N/A	N/A	N/A	N/A	N/A			Length	108.79	15.65	81.63	126.53
8	Live	48.1	N/A	N/A	N/A	N/A	N/A			Time	N/A	N/A	N/A	N/A
Feature	Mean	St.Dev	Minimum	Maximum						Velocity	N/A	N/A	N/A	N/A
Length	73.01	17.37	48.1	101.89						Item	Source	Length	ND.T	ND.Z	ND.M	Time	Velocity	Comment
Time	N/A	N/A	N/A	N/A						1	Live	55.75	N/A	N/A	N/A	N/A	N/A	db 54
Velocity	N/A	N/A	N/A	N/A						2	Live	47.67	N/A	N/A	N/A	N/A	N/A
Item	Source	Length	ND.T	ND.Z	ND.M	Time	Velocity	Comment		3	Live	43.02	N/A	N/A	N/A	N/A	N/A
1	Live	54.15	N/A	N/A	N/A	N/A	N/A	db 115		4	Live	57.82	N/A	N/A	N/A	N/A	N/A
2	Live	62.32	N/A	N/A	N/A	N/A	N/A			5	Live	53.89	N/A	N/A	N/A	N/A	N/A
3	Live	64.13	N/A	N/A	N/A	N/A	N/A			6	Live	57.71	N/A	N/A	N/A	N/A	N/A
4	Live	33.68	N/A	N/A	N/A	N/A	N/A			7	Live	50.92	N/A	N/A	N/A	N/A	N/A
5	Live	44.08	N/A	N/A	N/A	N/A	N/A			8	Live	47.15	N/A	N/A	N/A	N/A	N/A
6	Live	57.55	N/A	N/A	N/A	N/A	N/A			Feature	Mean	St.Dev	Minimum	Maximum
7	Live	52.38	N/A	N/A	N/A	N/A	N/A			Length	51.74	5.1	43.02	57.82
8	Live	50.64	N/A	N/A	N/A	N/A	N/A			Time	N/A	N/A	N/A	N/A
Feature	Mean	St.Dev	Minimum	Maximum						Velocity	N/A	N/A	N/A	N/A
Length	52.37	9.28	33.68	64.13						Item	Source	Length	ND.T	ND.Z	ND.M	Time	Velocity	Comment
Time	N/A	N/A	N/A	N/A						1	Live	68.45	N/A	N/A	N/A	N/A	N/A	db 52
Velocity	N/A	N/A	N/A	N/A						2	Live	81.1	N/A	N/A	N/A	N/A	N/A
										3	Live	80.28	N/A	N/A	N/A	N/A	N/A
										4	Live	96.02	N/A	N/A	N/A	N/A	N/A
										5	Live	80.68	N/A	N/A	N/A	N/A	N/A
										6	Live	66.19	N/A	N/A	N/A	N/A	N/A
										7	Live	52.85	N/A	N/A	N/A	N/A	N/A
										8	Live	69.81	N/A	N/A	N/A	N/A	N/A
										Feature	Mean	St.Dev	Minimum	Maximum
										Length	74.42	12.12	52.85	96.02
										Time	N/A	N/A	N/A	N/A
										Velocity	N/A	N/A	N/A	N/A
Item	Source	Length	ND.T	ND.Z	ND.M	Time	Velocity	Comment
1	Live	69.81	N/A	N/A	N/A	N/A	N/A	db 116
2	Live	66.91	N/A	N/A	N/A	N/A	N/A
3	Live	61.43	N/A	N/A	N/A	N/A	N/A
4	Live	58.5	N/A	N/A	N/A	N/A	N/A
5	Live	63.43	N/A	N/A	N/A	N/A	N/A
6	Live	59.32	N/A	N/A	N/A	N/A	N/A
7	Live	62.69	N/A	N/A	N/A	N/A	N/A
8	Live	61.24	N/A	N/A	N/A	N/A	N/A
Feature	Mean	St.Dev	Minimum	Maximum
Length	62.92	3.56	58.5	69.81
Time	N/A	N/A	N/A	N/A
Velocity	N/A	N/A	N/A	N/A
Item	Source	Length	ND.T	ND.Z	ND.M	Time	Velocity	Comment
1	Live	62.34	N/A	N/A	N/A	N/A	N/A	db 117
2	Live	63.18	N/A	N/A	N/A	N/A	N/A
3	Live	49.66	N/A	N/A	N/A	N/A	N/A
4	Live	68.86	N/A	N/A	N/A	N/A	N/A
5	Live	67.59	N/A	N/A	N/A	N/A	N/A
6	Live	63.02	N/A	N/A	N/A	N/A	N/A
7	Live	60.09	N/A	N/A	N/A	N/A	N/A
8	Live	60.39	N/A	N/A	N/A	N/A	N/A
Feature	Mean	St.Dev	Minimum	Maximum
Length	61.89	5.47	49.66	68.86
Time	N/A	N/A	N/A	N/A
Velocity	N/A	N/A	N/A	N/A
Item	Source	Length	ND.T	ND.Z	ND.M	Time	Velocity	Comment
1	Live	52.3	N/A	N/A	N/A	N/A	N/A	db 119
2	Live	55.73	N/A	N/A	N/A	N/A	N/A
3	Live	47.32	N/A	N/A	N/A	N/A	N/A
4	Live	46.84	N/A	N/A	N/A	N/A	N/A
5	Live	50.97	N/A	N/A	N/A	N/A	N/A
6	Live	42.46	N/A	N/A	N/A	N/A	N/A
7	Live	56.64	N/A	N/A	N/A	N/A	N/A
8	Live	53.85	N/A	N/A	N/A	N/A	N/A
Feature	Mean	St.Dev	Minimum	Maximum
Length	50.76	4.57	42.46	56.64
Time	N/A	N/A	N/A	N/A
Velocity	N/A	N/A	N/A	N/A
Item	Source	Length	ND.T	ND.Z	ND.M	Time	Velocity	Comment
1	Live	43.06	N/A	N/A	N/A	N/A	N/A	db 120
2	Live	40.15	N/A	N/A	N/A	N/A	N/A
3	Live	39.02	N/A	N/A	N/A	N/A	N/A
4	Live	40.87	N/A	N/A	N/A	N/A	N/A
5	Live	49.68	N/A	N/A	N/A	N/A	N/A
6	Live	58.35	N/A	N/A	N/A	N/A	N/A
7	Live	57.56	N/A	N/A	N/A	N/A	N/A
8	Live	52.91	N/A	N/A	N/A	N/A	N/A
Feature	Mean	St.Dev	Minimum	Maximum
Length	47.7	7.44	39.02	58.35
Time	N/A	N/A	N/A	N/A
Velocity	N/A	N/A	N/A	N/A
Item	Source	Length	ND.T	ND.Z	ND.M	Time	Velocity	Comment
1	Live	55.69	N/A	N/A	N/A	N/A	N/A	db 146
2	Live	52.41	N/A	N/A	N/A	N/A	N/A
3	Live	47.14	N/A	N/A	N/A	N/A	N/A
4	Live	56.28	N/A	N/A	N/A	N/A	N/A
5	Live	61.23	N/A	N/A	N/A	N/A	N/A
6	Live	46.47	N/A	N/A	N/A	N/A	N/A
7	Live	46.21	N/A	N/A	N/A	N/A	N/A
8	Live	41.26	N/A	N/A	N/A	N/A	N/A
Feature	Mean	St.Dev	Minimum	Maximum
Length	50.84	6.22	41.26	61.23
Time	N/A	N/A	N/A	N/A
Velocity	N/A	N/A	N/A	N/A
Item	Source	Length	ND.T	ND.Z	ND.M	Time	Velocity	Comment
1	Live	55.23	N/A	N/A	N/A	N/A	N/A	db 147
2	Live	54.49	N/A	N/A	N/A	N/A	N/A
3	Live	47.79	N/A	N/A	N/A	N/A	N/A
4	Live	82.59	N/A	N/A	N/A	N/A	N/A
5	Live	97.94	N/A	N/A	N/A	N/A	N/A
6	Live	59.13	N/A	N/A	N/A	N/A	N/A
7	Live	66.1	N/A	N/A	N/A	N/A	N/A
8	Live	59.82	N/A	N/A	N/A	N/A	N/A
Feature	Mean	St.Dev	Minimum	Maximum
Length	65.39	15.64	47.79	97.94
Time	N/A	N/A	N/A	N/A
Velocity	N/A	N/A	N/A	N/A
Item	Source	Length	ND.T	ND.Z	ND.M	Time	Velocity	Comment
1	Live	72.7	N/A	N/A	N/A	N/A	N/A	db 148
2	Live	46.68	N/A	N/A	N/A	N/A	N/A
3	Live	48.39	N/A	N/A	N/A	N/A	N/A
4	Live	52.57	N/A	N/A	N/A	N/A	N/A
5	Live	59.32	N/A	N/A	N/A	N/A	N/A
6	Live	63.98	N/A	N/A	N/A	N/A	N/A
7	Live	60.59	N/A	N/A	N/A	N/A	N/A
8	Live	62.44	N/A	N/A	N/A	N/A	N/A
Feature	Mean	St.Dev	Minimum	Maximum
Length	58.33	8.13	46.68	72.7
Time	N/A	N/A	N/A	N/A
Velocity	N/A	N/A	N/A	N/A
Item	Source	Length	ND.T	ND.Z	ND.M	Time	Velocity	Comment
1	Live	64.89	N/A	N/A	N/A	N/A	N/A	db 149
2	Live	96.14	N/A	N/A	N/A	N/A	N/A
3	Live	50.28	N/A	N/A	N/A	N/A	N/A
4	Live	48.83	N/A	N/A	N/A	N/A	N/A
5	Live	52.84	N/A	N/A	N/A	N/A	N/A
6	Live	57.29	N/A	N/A	N/A	N/A	N/A
7	Live	69.14	N/A	N/A	N/A	N/A	N/A
8	Live	70.46	N/A	N/A	N/A	N/A	N/A
Feature	Mean	St.Dev	Minimum	Maximum
Length	63.73	14.53	48.83	96.14
Time	N/A	N/A	N/A	N/A
Velocity	N/A	N/A	N/A	N/A
Item	Source	Length	ND.T	ND.Z	ND.M	Time	Velocity	Comment
1	Live	28.41	N/A	N/A	N/A	N/A	N/A	db 150
2	Live	30.62	N/A	N/A	N/A	N/A	N/A
3	Live	34.53	N/A	N/A	N/A	N/A	N/A
4	Live	23.1	N/A	N/A	N/A	N/A	N/A
5	Live	17.7	N/A	N/A	N/A	N/A	N/A
6	Live	25.47	N/A	N/A	N/A	N/A	N/A
7	Live	32.95	N/A	N/A	N/A	N/A	N/A
8	Live	26.55	N/A	N/A	N/A	N/A	N/A
Feature	Mean	St.Dev	Minimum	Maximum
Length	27.42	5.12	17.7	34.53
Time	N/A	N/A	N/A	N/A
Velocity	N/A	N/A	N/A	N/A
Item	Source	Length	ND.T	ND.Z	ND.M	Time	Velocity	Comment
1	Live	68.02	N/A	N/A	N/A	N/A	N/A	db 161
2	Live	73.56	N/A	N/A	N/A	N/A	N/A
3	Live	78.68	N/A	N/A	N/A	N/A	N/A
4	Live	70.67	N/A	N/A	N/A	N/A	N/A
5	Live	69.5	N/A	N/A	N/A	N/A	N/A
6	Live	78.28	N/A	N/A	N/A	N/A	N/A
7	Live	74.65	N/A	N/A	N/A	N/A	N/A
8	Live	83.47	N/A	N/A	N/A	N/A	N/A
Feature	Mean	St.Dev	Minimum	Maximum
Length	74.6	4.93	68.02	83.47
Time	N/A	N/A	N/A	N/A
Velocity	N/A	N/A	N/A	N/A
Item	Source	Length	ND.T	ND.Z	ND.M	Time	Velocity	Comment
1	Live	66.88	N/A	N/A	N/A	N/A	N/A	db 162
2	Live	56.46	N/A	N/A	N/A	N/A	N/A
3	Live	68.24	N/A	N/A	N/A	N/A	N/A
4	Live	88.41	N/A	N/A	N/A	N/A	N/A
5	Live	72.55	N/A	N/A	N/A	N/A	N/A
6	Live	55.93	N/A	N/A	N/A	N/A	N/A
7	Live	61.6	N/A	N/A	N/A	N/A	N/A
8	Live	64.44	N/A	N/A	N/A	N/A	N/A
Feature	Mean	St.Dev	Minimum	Maximum
Length	66.81	9.75	55.93	88.41
Time	N/A	N/A	N/A	N/A
Velocity	N/A	N/A	N/A	N/A
Item	Source	Length	ND.T	ND.Z	ND.M	Time	Velocity	Comment
1	Live	46.57	N/A	N/A	N/A	N/A	N/A	db 163
2	Live	40.97	N/A	N/A	N/A	N/A	N/A
3	Live	47.67	N/A	N/A	N/A	N/A	N/A
4	Live	54.51	N/A	N/A	N/A	N/A	N/A
5	Live	56.65	N/A	N/A	N/A	N/A	N/A
6	Live	49.52	N/A	N/A	N/A	N/A	N/A
7	Live	46.25	N/A	N/A	N/A	N/A	N/A
8	Live	48.47	N/A	N/A	N/A	N/A	N/A
Feature	Mean	St.Dev	Minimum	Maximum
Length	48.83	4.6	40.97	56.65
Time	N/A	N/A	N/A	N/A
Velocity	N/A	N/A	N/A	N/A
Item	Source	Length	ND.T	ND.Z	ND.M	Time	Velocity	Comment
1	Live	38.58	N/A	N/A	N/A	N/A	N/A	db 164
2	Live	32.94	N/A	N/A	N/A	N/A	N/A
3	Live	26.54	N/A	N/A	N/A	N/A	N/A
4	Live	24.02	N/A	N/A	N/A	N/A	N/A
5	Live	21.51	N/A	N/A	N/A	N/A	N/A
6	Live	28.89	N/A	N/A	N/A	N/A	N/A
7	Live	24.04	N/A	N/A	N/A	N/A	N/A
8	Live	21.79	N/A	N/A	N/A	N/A	N/A
Feature	Mean	St.Dev	Minimum	Maximum
Length	27.29	5.56	21.51	38.58
Time	N/A	N/A	N/A	N/A
Velocity	N/A	N/A	N/A	N/A
Item	Source	Length	ND.T	ND.Z	ND.M	Time	Velocity	Comment
1	Live	60.05	N/A	N/A	N/A	N/A	N/A	db 165
2	Live	52.55	N/A	N/A	N/A	N/A	N/A
3	Live	70.55	N/A	N/A	N/A	N/A	N/A
4	Live	62.02	N/A	N/A	N/A	N/A	N/A
5	Live	68.25	N/A	N/A	N/A	N/A	N/A
6	Live	72.79	N/A	N/A	N/A	N/A	N/A
7	Live	78.25	N/A	N/A	N/A	N/A	N/A
8	Live	75.92	N/A	N/A	N/A	N/A	N/A
Feature	Mean	St.Dev	Minimum	Maximum
Length	67.55	8.17	52.55	78.25
Time	N/A	N/A	N/A	N/A
Velocity	N/A	N/A	N/A	N/A
Item	Source	Length	ND.T	ND.Z	ND.M	Time	Velocity	Comment
1	Live	53.11	N/A	N/A	N/A	N/A	N/A	db 107
2	Live	44.15	N/A	N/A	N/A	N/A	N/A
3	Live	35.21	N/A	N/A	N/A	N/A	N/A
4	Live	25.09	N/A	N/A	N/A	N/A	N/A
5	Live	28.4	N/A	N/A	N/A	N/A	N/A
6	Live	26.44	N/A	N/A	N/A	N/A	N/A
7	Live	35.26	N/A	N/A	N/A	N/A	N/A
8	Live	36.29	N/A	N/A	N/A	N/A	N/A
Feature	Mean	St.Dev	Minimum	Maximum
Length	35.49	8.85	25.09	53.11
Time	N/A	N/A	N/A	N/A
Velocity	N/A	N/A	N/A	N/A
Item	Source	Length	ND.T	ND.Z	ND.M	Time	Velocity	Comment
1	Live	52.81	N/A	N/A	N/A	N/A	N/A	db 108
2	Live	52.15	N/A	N/A	N/A	N/A	N/A
3	Live	57.43	N/A	N/A	N/A	N/A	N/A
4	Live	63.11	N/A	N/A	N/A	N/A	N/A
5	Live	49.41	N/A	N/A	N/A	N/A	N/A
6	Live	48.94	N/A	N/A	N/A	N/A	N/A
7	Live	58.71	N/A	N/A	N/A	N/A	N/A
8	Live	44.71	N/A	N/A	N/A	N/A	N/A
Feature	Mean	St.Dev	Minimum	Maximum
Length	53.41	5.61	44.71	63.11
Time	N/A	N/A	N/A	N/A
Velocity	N/A	N/A	N/A	N/A
Item	Source	Length	ND.T	ND.Z	ND.M	Time	Velocity	Comment
1	Live	33.68	N/A	N/A	N/A	N/A	N/A	db 109
2	Live	38.34	N/A	N/A	N/A	N/A	N/A
3	Live	31.9	N/A	N/A	N/A	N/A	N/A
4	Live	35.59	N/A	N/A	N/A	N/A	N/A
5	Live	33.99	N/A	N/A	N/A	N/A	N/A
6	Live	40.67	N/A	N/A	N/A	N/A	N/A
7	Live	35.2	N/A	N/A	N/A	N/A	N/A
8	Live	35.47	N/A	N/A	N/A	N/A	N/A
Feature	Mean	St.Dev	Minimum	Maximum
Length	35.6	2.58	31.9	40.67
Time	N/A	N/A	N/A	N/A
Velocity	N/A	N/A	N/A	N/A
Item	Source	Length	ND.T	ND.Z	ND.M	Time	Velocity	Comment
1	Live	71.76	N/A	N/A	N/A	N/A	N/A	db 83
2	Live	90.96	N/A	N/A	N/A	N/A	N/A
3	Live	49.19	N/A	N/A	N/A	N/A	N/A
4	Live	51.54	N/A	N/A	N/A	N/A	N/A
5	Live	67.08	N/A	N/A	N/A	N/A	N/A
6	Live	70.06	N/A	N/A	N/A	N/A	N/A
7	Live	60.22	N/A	N/A	N/A	N/A	N/A
8	Live	67.75	N/A	N/A	N/A	N/A	N/A
Feature	Mean	St.Dev	Minimum	Maximum
Length	66.07	12.26	49.19	90.96
Time	N/A	N/A	N/A	N/A
Velocity	N/A	N/A	N/A	N/A
Item	Source	Length	ND.T	ND.Z	ND.M	Time	Velocity	Comment
1	Live	44.41	N/A	N/A	N/A	N/A	N/A	db 101
2	Live	64.3	N/A	N/A	N/A	N/A	N/A
3	Live	54.75	N/A	N/A	N/A	N/A	N/A
4	Live	53.36	N/A	N/A	N/A	N/A	N/A
5	Live	52.34	N/A	N/A	N/A	N/A	N/A
6	Live	53.14	N/A	N/A	N/A	N/A	N/A
7	Live	64.63	N/A	N/A	N/A	N/A	N/A
8	Live	56.09	N/A	N/A	N/A	N/A	N/A
Feature	Mean	St.Dev	Minimum	Maximum
Length	55.38	6.17	44.41	64.63
Time	N/A	N/A	N/A	N/A
Velocity	N/A	N/A	N/A	N/A
Item	Source	Length	ND.T	ND.Z	ND.M	Time	Velocity	Comment
1	Live	82.78	N/A	N/A	N/A	N/A	N/A	db 81
2	Live	43.58	N/A	N/A	N/A	N/A	N/A
3	Live	46.73	N/A	N/A	N/A	N/A	N/A
4	Live	49.66	N/A	N/A	N/A	N/A	N/A
5	Live	61.84	N/A	N/A	N/A	N/A	N/A
6	Live	45.32	N/A	N/A	N/A	N/A	N/A
7	Live	70.54	N/A	N/A	N/A	N/A	N/A
8	Live	36.49	N/A	N/A	N/A	N/A	N/A
Feature	Mean	St.Dev	Minimum	Maximum
Length	54.62	14.67	36.49	82.78
Time	N/A	N/A	N/A	N/A
Velocity	N/A	N/A	N/A	N/A
Item	Source	Length	ND.T	ND.Z	ND.M	Time	Velocity	Comment
1	Live	41.61	N/A	N/A	N/A	N/A	N/A	db 66
2	Live	53.22	N/A	N/A	N/A	N/A	N/A
3	Live	56.68	N/A	N/A	N/A	N/A	N/A
4	Live	76.71	N/A	N/A	N/A	N/A	N/A
5	Live	50	N/A	N/A	N/A	N/A	N/A
6	Live	53.47	N/A	N/A	N/A	N/A	N/A
7	Live	63.74	N/A	N/A	N/A	N/A	N/A
8	Live	70.27	N/A	N/A	N/A	N/A	N/A
Feature	Mean	St.Dev	Minimum	Maximum
Length	58.21	10.67	41.61	76.71
Time	N/A	N/A	N/A	N/A
Velocity	N/A	N/A	N/A	N/A
Item	Source	Length	ND.T	ND.Z	ND.M	Time	Velocity	Comment
1	Live	74.17	N/A	N/A	N/A	N/A	N/A	db 47
2	Live	114.68	N/A	N/A	N/A	N/A	N/A
3	Live	95.36	N/A	N/A	N/A	N/A	N/A
4	Live	122.55	N/A	N/A	N/A	N/A	N/A
5	Live	88.66	N/A	N/A	N/A	N/A	N/A
6	Live	84.59	N/A	N/A	N/A	N/A	N/A
7	Live	70.74	N/A	N/A	N/A	N/A	N/A
8	Live	83.71	N/A	N/A	N/A	N/A	N/A
Feature	Mean	St.Dev	Minimum	Maximum
Length	91.81	17.19	70.74	122.55
Time	N/A	N/A	N/A	N/A
Velocity	N/A	N/A	N/A	N/A
Item	Source	Length	ND.T	ND.Z	ND.M	Time	Velocity	Comment
1	Live	81.01	N/A	N/A	N/A	N/A	N/A	db 45
2	Live	77.48	N/A	N/A	N/A	N/A	N/A
3	Live	66.93	N/A	N/A	N/A	N/A	N/A
4	Live	75.24	N/A	N/A	N/A	N/A	N/A
5	Live	53.89	N/A	N/A	N/A	N/A	N/A
6	Live	63.56	N/A	N/A	N/A	N/A	N/A
7	Live	45.9	N/A	N/A	N/A	N/A	N/A
8	Live	67.42	N/A	N/A	N/A	N/A	N/A
Feature	Mean	St.Dev	Minimum	Maximum
Length	66.43	11.18	45.9	81.01
Time	N/A	N/A	N/A	N/A
Velocity	N/A	N/A	N/A	N/A
Item	Source	Length	ND.T	ND.Z	ND.M	Time	Velocity	Comment
1	Live	50.34	N/A	N/A	N/A	N/A	N/A	db 43
2	Live	55.76	N/A	N/A	N/A	N/A	N/A
3	Live	57.47	N/A	N/A	N/A	N/A	N/A
4	Live	44.84	N/A	N/A	N/A	N/A	N/A
5	Live	66.81	N/A	N/A	N/A	N/A	N/A
6	Live	53.39	N/A	N/A	N/A	N/A	N/A
7	Live	65.96	N/A	N/A	N/A	N/A	N/A
8	Live	58.94	N/A	N/A	N/A	N/A	N/A
Feature	Mean	St.Dev	Minimum	Maximum
Length	56.69	6.95	44.84	66.81
Time	N/A	N/A	N/A	N/A
Velocity	N/A	N/A	N/A	N/A
Item	Source	Length	ND.T	ND.Z	ND.M	Time	Velocity	Comment
1	Live	56.37	N/A	N/A	N/A	N/A	N/A	db 42
2	Live	71.34	N/A	N/A	N/A	N/A	N/A
3	Live	69.15	N/A	N/A	N/A	N/A	N/A
4	Live	45.47	N/A	N/A	N/A	N/A	N/A
5	Live	76.46	N/A	N/A	N/A	N/A	N/A
6	Live	49.52	N/A	N/A	N/A	N/A	N/A
7	Live	46.74	N/A	N/A	N/A	N/A	N/A
8	Live	79.26	N/A	N/A	N/A	N/A	N/A
Feature	Mean	St.Dev	Minimum	Maximum
Length	61.79	12.94	45.47	79.26
Time	N/A	N/A	N/A	N/A
Velocity	N/A	N/A	N/A	N/A
Item	Source	Length	ND.T	ND.Z	ND.M	Time	Velocity	Comment
1	Live	39.11	N/A	N/A	N/A	N/A	N/A	db 160
2	Live	48.91	N/A	N/A	N/A	N/A	N/A
3	Live	37.68	N/A	N/A	N/A	N/A	N/A
4	Live	44.34	N/A	N/A	N/A	N/A	N/A
5	Live	32.09	N/A	N/A	N/A	N/A	N/A
6	Live	36.99	N/A	N/A	N/A	N/A	N/A
7	Live	39.27	N/A	N/A	N/A	N/A	N/A
8	Live	37.68	N/A	N/A	N/A	N/A	N/A
Feature	Mean	St.Dev	Minimum	Maximum
Length	39.51	4.74	32.09	48.91
Time	N/A	N/A	N/A	N/A
Velocity	N/A	N/A	N/A	N/A
Item	Source	Length	ND.T	ND.Z	ND.M	Time	Velocity	Comment
1	Live	75.57	N/A	N/A	N/A	N/A	N/A	db 159
2	Live	64.13	N/A	N/A	N/A	N/A	N/A
3	Live	37.67	N/A	N/A	N/A	N/A	N/A
4	Live	57.47	N/A	N/A	N/A	N/A	N/A
5	Live	40.19	N/A	N/A	N/A	N/A	N/A
6	Live	50.51	N/A	N/A	N/A	N/A	N/A
7	Live	54.99	N/A	N/A	N/A	N/A	N/A
8	Live	86.76	N/A	N/A	N/A	N/A	N/A
Feature	Mean	St.Dev	Minimum	Maximum
Length	58.41	15.68	37.67	86.76
Time	N/A	N/A	N/A	N/A
Velocity	N/A	N/A	N/A	N/A
Item	Source	Length	ND.T	ND.Z	ND.M	Time	Velocity	Comment
1	Live	62.02	N/A	N/A	N/A	N/A	N/A	db 154
2	Live	50.61	N/A	N/A	N/A	N/A	N/A
3	Live	56.29	N/A	N/A	N/A	N/A	N/A
4	Live	58.35	N/A	N/A	N/A	N/A	N/A
5	Live	77.32	N/A	N/A	N/A	N/A	N/A
6	Live	59.86	N/A	N/A	N/A	N/A	N/A
7	Live	60.9	N/A	N/A	N/A	N/A	N/A
8	Live	80.97	N/A	N/A	N/A	N/A	N/A
Feature	Mean	St.Dev	Minimum	Maximum
Length	63.29	9.76	50.61	80.97
Time	N/A	N/A	N/A	N/A
Velocity	N/A	N/A	N/A	N/A
Item	Source	Length	ND.T	ND.Z	ND.M	Time	Velocity	Comment
1	Live	48.5	N/A	N/A	N/A	N/A	N/A	db 143
2	Live	69.15	N/A	N/A	N/A	N/A	N/A
3	Live	53.1	N/A	N/A	N/A	N/A	N/A
4	Live	47.82	N/A	N/A	N/A	N/A	N/A
5	Live	52.91	N/A	N/A	N/A	N/A	N/A
6	Live	60.31	N/A	N/A	N/A	N/A	N/A
7	Live	58.48	N/A	N/A	N/A	N/A	N/A
8	Live	49.8	N/A	N/A	N/A	N/A	N/A
Feature	Mean	St.Dev	Minimum	Maximum
Length	55.01	6.8	47.82	69.15
Time	N/A	N/A	N/A	N/A
Velocity	N/A	N/A	N/A	N/A
Item	Source	Length	ND.T	ND.Z	ND.M	Time	Velocity	Comment
1	Live	53.75	N/A	N/A	N/A	N/A	N/A	db 140
2	Live	50.2	N/A	N/A	N/A	N/A	N/A
3	Live	52.39	N/A	N/A	N/A	N/A	N/A
4	Live	65.6	N/A	N/A	N/A	N/A	N/A
5	Live	80.51	N/A	N/A	N/A	N/A	N/A
6	Live	43.8	N/A	N/A	N/A	N/A	N/A
7	Live	46.24	N/A	N/A	N/A	N/A	N/A
8	Live	38.1	N/A	N/A	N/A	N/A	N/A
Feature	Mean	St.Dev	Minimum	Maximum
Length	53.83	12.61	38.1	80.51
Time	N/A	N/A	N/A	N/A
Velocity	N/A	N/A	N/A	N/A
Item	Source	Length	ND.T	ND.Z	ND.M	Time	Velocity	Comment
1	Live	61.59	N/A	N/A	N/A	N/A	N/A	db 138
2	Live	43.54	N/A	N/A	N/A	N/A	N/A
3	Live	45.13	N/A	N/A	N/A	N/A	N/A
4	Live	70.27	N/A	N/A	N/A	N/A	N/A
5	Live	44.02	N/A	N/A	N/A	N/A	N/A
6	Live	61.69	N/A	N/A	N/A	N/A	N/A
7	Live	54.58	N/A	N/A	N/A	N/A	N/A
8	Live	40.83	N/A	N/A	N/A	N/A	N/A
Feature	Mean	St.Dev	Minimum	Maximum
Length	52.71	10.18	40.83	70.27
Time	N/A	N/A	N/A	N/A
Velocity	N/A	N/A	N/A	N/A
Item	Source	Length	ND.T	ND.Z	ND.M	Time	Velocity	Comment
1	Live	59.46	N/A	N/A	N/A	N/A	N/A	db 137
2	Live	41.68	N/A	N/A	N/A	N/A	N/A
3	Live	44.42	N/A	N/A	N/A	N/A	N/A
4	Live	40.61	N/A	N/A	N/A	N/A	N/A
5	Live	42.83	N/A	N/A	N/A	N/A	N/A
6	Live	43.3	N/A	N/A	N/A	N/A	N/A
7	Live	41.06	N/A	N/A	N/A	N/A	N/A
8	Live	51.74	N/A	N/A	N/A	N/A	N/A
Feature	Mean	St.Dev	Minimum	Maximum
Length	45.64	6.17	40.61	59.46
Time	N/A	N/A	N/A	N/A
Velocity	N/A	N/A	N/A	N/A
Item	Source	Length	ND.T	ND.Z	ND.M	Time	Velocity	Comment
1	Live	65.49	N/A	N/A	N/A	N/A	N/A	db 114
2	Live	76.26	N/A	N/A	N/A	N/A	N/A
3	Live	66.1	N/A	N/A	N/A	N/A	N/A
4	Live	72.42	N/A	N/A	N/A	N/A	N/A
5	Live	59.34	N/A	N/A	N/A	N/A	N/A
6	Live	80.09	N/A	N/A	N/A	N/A	N/A
7	Live	66.95	N/A	N/A	N/A	N/A	N/A
8	Live	65.31	N/A	N/A	N/A	N/A	N/A
Feature	Mean	St.Dev	Minimum	Maximum
Length	69	6.32	59.34	80.09
Time	N/A	N/A	N/A	N/A
Velocity	N/A	N/A	N/A	N/A
Item	Source	Length	ND.T	ND.Z	ND.M	Time	Velocity	Comment
1	Live	50.31	N/A	N/A	N/A	N/A	N/A	db 111
2	Live	48.16	N/A	N/A	N/A	N/A	N/A
3	Live	56.26	N/A	N/A	N/A	N/A	N/A
4	Live	72.55	N/A	N/A	N/A	N/A	N/A
5	Live	37.26	N/A	N/A	N/A	N/A	N/A
6	Live	39.59	N/A	N/A	N/A	N/A	N/A
7	Live	56.65	N/A	N/A	N/A	N/A	N/A
8	Live	32.06	N/A	N/A	N/A	N/A	N/A
Feature	Mean	St.Dev	Minimum	Maximum
Length	49.11	12.15	32.06	72.55
Time	N/A	N/A	N/A	N/A
Velocity	N/A	N/A	N/A	N/A
Item	Source	Length	ND.T	ND.Z	ND.M	Time	Velocity	Comment
1	Live	105.58	N/A	N/A	N/A	N/A	N/A	db 112
2	Live	111.24	N/A	N/A	N/A	N/A	N/A
3	Live	98.65	N/A	N/A	N/A	N/A	N/A
4	Live	108.84	N/A	N/A	N/A	N/A	N/A
5	Live	97.88	N/A	N/A	N/A	N/A	N/A
6	Live	114.73	N/A	N/A	N/A	N/A	N/A
7	Live	120.58	N/A	N/A	N/A	N/A	N/A
8	Live	110.15	N/A	N/A	N/A	N/A	N/A
Feature	Mean	St.Dev	Minimum	Maximum
Length	108.46	7.19	97.88	120.58
Time	N/A	N/A	N/A	N/A
Velocity	N/A	N/A	N/A	N/A
Item	Source	Length	ND.T	ND.Z	ND.M	Time	Velocity	Comment
1	Live	106.5	N/A	N/A	N/A	N/A	N/A	db 105
2	Live	86.83	N/A	N/A	N/A	N/A	N/A
3	Live	76.17	N/A	N/A	N/A	N/A	N/A
4	Live	91.44	N/A	N/A	N/A	N/A	N/A
5	Live	82.04	N/A	N/A	N/A	N/A	N/A
6	Live	75.2	N/A	N/A	N/A	N/A	N/A
7	Live	77.56	N/A	N/A	N/A	N/A	N/A
8	Live	75.01	N/A	N/A	N/A	N/A	N/A
Feature	Mean	St.Dev	Minimum	Maximum
Length	83.84	10.21	75.01	106.5
Time	N/A	N/A	N/A	N/A
Velocity	N/A	N/A	N/A	N/A
Item	Source	Length	ND.T	ND.Z	ND.M	Time	Velocity	Comment
1	Live	53.85	N/A	N/A	N/A	N/A	N/A	db 50
2	Live	63.94	N/A	N/A	N/A	N/A	N/A
3	Live	77.43	N/A	N/A	N/A	N/A	N/A
4	Live	64.61	N/A	N/A	N/A	N/A	N/A
5	Live	69.15	N/A	N/A	N/A	N/A	N/A
6	Live	74.97	N/A	N/A	N/A	N/A	N/A
7	Live	66.73	N/A	N/A	N/A	N/A	N/A
8	Live	73.77	N/A	N/A	N/A	N/A	N/A
Feature	Mean	St.Dev	Minimum	Maximum
Length	68.06	7.09	53.85	77.43
Time	N/A	N/A	N/A	N/A
Velocity	N/A	N/A	N/A	N/A
Item	Source	Length	ND.T	ND.Z	ND.M	Time	Velocity	Comment
1	Live	63.82	N/A	N/A	N/A	N/A	N/A	db 48
2	Live	64.62	N/A	N/A	N/A	N/A	N/A
3	Live	59.12	N/A	N/A	N/A	N/A	N/A
4	Live	63.01	N/A	N/A	N/A	N/A	N/A
5	Live	62.96	N/A	N/A	N/A	N/A	N/A
6	Live	58.29	N/A	N/A	N/A	N/A	N/A
7	Live	63.81	N/A	N/A	N/A	N/A	N/A
8	Live	53.12	N/A	N/A	N/A	N/A	N/A
Feature	Mean	St.Dev	Minimum	Maximum
Length	61.09	3.7	53.12	64.62
Time	N/A	N/A	N/A	N/A
Velocity	N/A	N/A	N/A	N/A
Item	Source	Length	ND.T	ND.Z	ND.M	Time	Velocity	Comment
1	Live	84.41	N/A	N/A	N/A	N/A	N/A	db 46
2	Live	130.28	N/A	N/A	N/A	N/A	N/A
3	Live	116.99	N/A	N/A	N/A	N/A	N/A
4	Live	101.39	N/A	N/A	N/A	N/A	N/A
5	Live	87.14	N/A	N/A	N/A	N/A	N/A
6	Live	83.39	N/A	N/A	N/A	N/A	N/A
7	Live	170.72	N/A	N/A	N/A	N/A	N/A
8	Live	101.49	N/A	N/A	N/A	N/A	N/A
Feature	Mean	St.Dev	Minimum	Maximum
Length	109.48	27.79	83.39	170.72
Time	N/A	N/A	N/A	N/A
Velocity	N/A	N/A	N/A	N/A
Item	Source	Length	ND.T	ND.Z	ND.M	Time	Velocity	Comment
1	Live	77.03	N/A	N/A	N/A	N/A	N/A	db 44
2	Live	63.38	N/A	N/A	N/A	N/A	N/A
3	Live	67.78	N/A	N/A	N/A	N/A	N/A
4	Live	80.66	N/A	N/A	N/A	N/A	N/A
5	Live	117.65	N/A	N/A	N/A	N/A	N/A
6	Live	98.24	N/A	N/A	N/A	N/A	N/A
7	Live	91.37	N/A	N/A	N/A	N/A	N/A
8	Live	89.92	N/A	N/A	N/A	N/A	N/A
Feature	Mean	St.Dev	Minimum	Maximum
Length	85.75	16.39	63.38	117.65
Time	N/A	N/A	N/A	N/A
Velocity	N/A	N/A	N/A	N/A
Item	Source	Length	ND.T	ND.Z	ND.M	Time	Velocity	Comment
1	Live	89.98	N/A	N/A	N/A	N/A	N/A	db 41
2	Live	96.85	N/A	N/A	N/A	N/A	N/A
3	Live	92.18	N/A	N/A	N/A	N/A	N/A
4	Live	87.16	N/A	N/A	N/A	N/A	N/A
5	Live	89.33	N/A	N/A	N/A	N/A	N/A
6	Live	93.16	N/A	N/A	N/A	N/A	N/A
7	Live	69.49	N/A	N/A	N/A	N/A	N/A
8	Live	77.09	N/A	N/A	N/A	N/A	N/A
Feature	Mean	St.Dev	Minimum	Maximum
Length	86.9	8.52	69.49	96.85
Time	N/A	N/A	N/A	N/A
Velocity	N/A	N/A	N/A	N/A
Item	Source	Length	ND.T	ND.Z	ND.M	Time	Velocity	Comment
1	Live	106.71	N/A	N/A	N/A	N/A	N/A	db 158
2	Live	140.53	N/A	N/A	N/A	N/A	N/A
3	Live	147.75	N/A	N/A	N/A	N/A	N/A
4	Live	134.84	N/A	N/A	N/A	N/A	N/A
5	Live	84.99	N/A	N/A	N/A	N/A	N/A
6	Live	84.26	N/A	N/A	N/A	N/A	N/A
7	Live	85.02	N/A	N/A	N/A	N/A	N/A
8	Live	89.29	N/A	N/A	N/A	N/A	N/A
Feature	Mean	St.Dev	Minimum	Maximum
Length	109.18	25.79	84.26	147.75
Time	N/A	N/A	N/A	N/A
Velocity	N/A	N/A	N/A	N/A
Item	Source	Length	ND.T	ND.Z	ND.M	Time	Velocity	Comment
1	Live	104.05	N/A	N/A	N/A	N/A	N/A	db 157
2	Live	77.75	N/A	N/A	N/A	N/A	N/A
3	Live	99.57	N/A	N/A	N/A	N/A	N/A
4	Live	80.09	N/A	N/A	N/A	N/A	N/A
5	Live	74.57	N/A	N/A	N/A	N/A	N/A
6	Live	85.46	N/A	N/A	N/A	N/A	N/A
7	Live	85.46	N/A	N/A	N/A	N/A	N/A
8	Live	99.88	N/A	N/A	N/A	N/A	N/A
Feature	Mean	St.Dev	Minimum	Maximum
Length	88.35	10.56	74.57	104.05
Time	N/A	N/A	N/A	N/A
Velocity	N/A	N/A	N/A	N/A
Item	Source	Length	ND.T	ND.Z	ND.M	Time	Velocity	Comment
1	Live	47.79	N/A	N/A	N/A	N/A	N/A	db 153
2	Live	29.54	N/A	N/A	N/A	N/A	N/A
3	Live	44.02	N/A	N/A	N/A	N/A	N/A
4	Live	37.48	N/A	N/A	N/A	N/A	N/A
5	Live	43.6	N/A	N/A	N/A	N/A	N/A
6	Live	28.6	N/A	N/A	N/A	N/A	N/A
7	Live	46.14	N/A	N/A	N/A	N/A	N/A
8	Live	34.68	N/A	N/A	N/A	N/A	N/A
Feature	Mean	St.Dev	Minimum	Maximum
Length	38.98	7.01	28.6	47.79
Time	N/A	N/A	N/A	N/A
Velocity	N/A	N/A	N/A	N/A
Item	Source	Length	ND.T	ND.Z	ND.M	Time	Velocity	Comment
1	Live	54.8	N/A	N/A	N/A	N/A	N/A	db 152
2	Live	62.96	N/A	N/A	N/A	N/A	N/A
3	Live	50.2	N/A	N/A	N/A	N/A	N/A
4	Live	55.59	N/A	N/A	N/A	N/A	N/A
5	Live	65.05	N/A	N/A	N/A	N/A	N/A
6	Live	67.42	N/A	N/A	N/A	N/A	N/A
7	Live	60.35	N/A	N/A	N/A	N/A	N/A
8	Live	66.55	N/A	N/A	N/A	N/A	N/A
Feature	Mean	St.Dev	Minimum	Maximum
Length	60.37	5.85	50.2	67.42
Time	N/A	N/A	N/A	N/A
Velocity	N/A	N/A	N/A	N/A
Item	Source	Length	ND.T	ND.Z	ND.M	Time	Velocity	Comment
1	Live	96.99	N/A	N/A	N/A	N/A	N/A	db 151
2	Live	83.72	N/A	N/A	N/A	N/A	N/A
3	Live	105.95	N/A	N/A	N/A	N/A	N/A
4	Live	116.77	N/A	N/A	N/A	N/A	N/A
5	Live	126.18	N/A	N/A	N/A	N/A	N/A
6	Live	107.48	N/A	N/A	N/A	N/A	N/A
7	Live	96.49	N/A	N/A	N/A	N/A	N/A
8	Live	104.45	N/A	N/A	N/A	N/A	N/A
Feature	Mean	St.Dev	Minimum	Maximum
Length	104.75	12.16	83.72	126.18
Time	N/A	N/A	N/A	N/A
Velocity	N/A	N/A	N/A	N/A
Item	Source	Length	ND.T	ND.Z	ND.M	Time	Velocity	Comment
1	Live	116.34	N/A	N/A	N/A	N/A	N/A	db 124
2	Live	101.73	N/A	N/A	N/A	N/A	N/A
3	Live	83.86	N/A	N/A	N/A	N/A	N/A
4	Live	107.68	N/A	N/A	N/A	N/A	N/A
5	Live	105.94	N/A	N/A	N/A	N/A	N/A
6	Live	136.38	N/A	N/A	N/A	N/A	N/A
7	Live	133.22	N/A	N/A	N/A	N/A	N/A
8	Live	128.92	N/A	N/A	N/A	N/A	N/A
Feature	Mean	St.Dev	Minimum	Maximum
Length	114.26	16.81	83.86	136.38
Time	N/A	N/A	N/A	N/A
Velocity	N/A	N/A	N/A	N/A
Item	Source	Length	ND.T	ND.Z	ND.M	Time	Velocity	Comment
1	Live	92.93	N/A	N/A	N/A	N/A	N/A	db 122
2	Live	83.8	N/A	N/A	N/A	N/A	N/A
3	Live	73.92	N/A	N/A	N/A	N/A	N/A
4	Live	76.93	N/A	N/A	N/A	N/A	N/A
5	Live	72.4	N/A	N/A	N/A	N/A	N/A
6	Live	75.93	N/A	N/A	N/A	N/A	N/A
7	Live	69.55	N/A	N/A	N/A	N/A	N/A
8	Live	76.11	N/A	N/A	N/A	N/A	N/A
Feature	Mean	St.Dev	Minimum	Maximum
Length	77.69	6.93	69.55	92.93
Time	N/A	N/A	N/A	N/A
Velocity	N/A	N/A	N/A	N/A
Item	Source	Length	ND.T	ND.Z	ND.M	Time	Velocity	Comment
1	Live	146.37	N/A	N/A	N/A	N/A	N/A	db 113
2	Live	114.8	N/A	N/A	N/A	N/A	N/A
3	Live	144.66	N/A	N/A	N/A	N/A	N/A
4	Live	128.21	N/A	N/A	N/A	N/A	N/A
5	Live	115.38	N/A	N/A	N/A	N/A	N/A
6	Live	124.22	N/A	N/A	N/A	N/A	N/A
7	Live	115.61	N/A	N/A	N/A	N/A	N/A
8	Live	108.49	N/A	N/A	N/A	N/A	N/A
Feature	Mean	St.Dev	Minimum	Maximum
Length	124.72	13.28	108.49	146.37
Time	N/A	N/A	N/A	N/A
Velocity	N/A	N/A	N/A	N/A
Item	Source	Length	ND.T	ND.Z	ND.M	Time	Velocity	Comment
1	Live	88.87	N/A	N/A	N/A	N/A	N/A	db 49
2	Live	106.08	N/A	N/A	N/A	N/A	N/A
3	Live	88.7	N/A	N/A	N/A	N/A	N/A
4	Live	116.02	N/A	N/A	N/A	N/A	N/A
5	Live	116.94	N/A	N/A	N/A	N/A	N/A
6	Live	134.47	N/A	N/A	N/A	N/A	N/A
7	Live	129.25	N/A	N/A	N/A	N/A	N/A
8	Live	130.28	N/A	N/A	N/A	N/A	N/A
Feature	Mean	St.Dev	Minimum	Maximum
Length	113.83	16.82	88.7	134.47
Time	N/A	N/A	N/A	N/A
Velocity	N/A	N/A	N/A	N/A
Item	Source	Length	ND.T	ND.Z	ND.M	Time	Velocity	Comment
1	Live	142.71	N/A	N/A	N/A	N/A	N/A	db 102
2	Live	80.83	N/A	N/A	N/A	N/A	N/A
3	Live	70.68	N/A	N/A	N/A	N/A	N/A
4	Live	99.72	N/A	N/A	N/A	N/A	N/A
5	Live	102.16	N/A	N/A	N/A	N/A	N/A
6	Live	107.67	N/A	N/A	N/A	N/A	N/A
7	Live	124.64	N/A	N/A	N/A	N/A	N/A
8	Live	108.25	N/A	N/A	N/A	N/A	N/A
Feature	Mean	St.Dev	Minimum	Maximum
Length	104.58	21.28	70.68	142.71
Time	N/A	N/A	N/A	N/A
Velocity	N/A	N/A	N/A	N/A
Item	Source	Length	ND.T	ND.Z	ND.M	Time	Velocity	Comment
1	Live	42.07	N/A	N/A	N/A	N/A	N/A	db 82
2	Live	58.11	N/A	N/A	N/A	N/A	N/A
3	Live	32.9	N/A	N/A	N/A	N/A	N/A
4	Live	77.76	N/A	N/A	N/A	N/A	N/A
5	Live	56.97	N/A	N/A	N/A	N/A	N/A
6	Live	28.15	N/A	N/A	N/A	N/A	N/A
7	Live	46.25	N/A	N/A	N/A	N/A	N/A
8	Live	28.9	N/A	N/A	N/A	N/A	N/A
Feature	Mean	St.Dev	Minimum	Maximum
Length	46.39	16.1	28.15	77.76
Time	N/A	N/A	N/A	N/A
Velocity	N/A	N/A	N/A	N/A
Item	Source	Length	ND.T	ND.Z	ND.M	Time	Velocity	Comment
1	Live	63.85	N/A	N/A	N/A	N/A	N/A	db 69
2	Live	60.35	N/A	N/A	N/A	N/A	N/A
3	Live	64.62	N/A	N/A	N/A	N/A	N/A
4	Live	64.07	N/A	N/A	N/A	N/A	N/A
5	Live	78.59	N/A	N/A	N/A	N/A	N/A
6	Live	61.93	N/A	N/A	N/A	N/A	N/A
7	Live	60.36	N/A	N/A	N/A	N/A	N/A
8	Live	49.58	N/A	N/A	N/A	N/A	N/A
Feature	Mean	St.Dev	Minimum	Maximum
Length	62.92	7.44	49.58	78.59
Time	N/A	N/A	N/A	N/A
Velocity	N/A	N/A	N/A	N/A
Item	Source	Length	ND.T	ND.Z	ND.M	Time	Velocity	Comment
1	Live	56.38	N/A	N/A	N/A	N/A	N/A	db 68
2	Live	53.67	N/A	N/A	N/A	N/A	N/A
3	Live	56.92	N/A	N/A	N/A	N/A	N/A
4	Live	53.58	N/A	N/A	N/A	N/A	N/A
5	Live	48.31	N/A	N/A	N/A	N/A	N/A
6	Live	57.86	N/A	N/A	N/A	N/A	N/A
7	Live	55.25	N/A	N/A	N/A	N/A	N/A
8	Live	66.93	N/A	N/A	N/A	N/A	N/A
Feature	Mean	St.Dev	Minimum	Maximum
Length	56.11	4.94	48.31	66.93
Time	N/A	N/A	N/A	N/A
Velocity	N/A	N/A	N/A	N/A
Item	Source	Length	ND.T	ND.Z	ND.M	Time	Velocity	Comment
1	Live	88.16	N/A	N/A	N/A	N/A	N/A	db 67
2	Live	63.69	N/A	N/A	N/A	N/A	N/A
3	Live	83.55	N/A	N/A	N/A	N/A	N/A
4	Live	85.53	N/A	N/A	N/A	N/A	N/A
5	Live	78.54	N/A	N/A	N/A	N/A	N/A
6	Live	67.59	N/A	N/A	N/A	N/A	N/A
7	Live	61.32	N/A	N/A	N/A	N/A	N/A
8	Live	66.87	N/A	N/A	N/A	N/A	N/A
Feature	Mean	St.Dev	Minimum	Maximum
Length	74.41	10.02	61.32	88.16
Time	N/A	N/A	N/A	N/A
Velocity	N/A	N/A	N/A	N/A
Item	Source	Length	ND.T	ND.Z	ND.M	Time	Velocity	Comment
1	Live	50.49	N/A	N/A	N/A	N/A	N/A	db 145
2	Live	40.1	N/A	N/A	N/A	N/A	N/A
3	Live	62.71	N/A	N/A	N/A	N/A	N/A
4	Live	42.01	N/A	N/A	N/A	N/A	N/A
5	Live	50.64	N/A	N/A	N/A	N/A	N/A
6	Live	47.15	N/A	N/A	N/A	N/A	N/A
7	Live	49.35	N/A	N/A	N/A	N/A	N/A
8	Live	40.15	N/A	N/A	N/A	N/A	N/A
Feature	Mean	St.Dev	Minimum	Maximum
Length	47.82	7	40.1	62.71
Time	N/A	N/A	N/A	N/A
Velocity	N/A	N/A	N/A	N/A
Item	Source	Length	ND.T	ND.Z	ND.M	Time	Velocity	Comment
1	Live	52.85	N/A	N/A	N/A	N/A	N/A	db 144
2	Live	52.28	N/A	N/A	N/A	N/A	N/A
3	Live	49.22	N/A	N/A	N/A	N/A	N/A
4	Live	45.13	N/A	N/A	N/A	N/A	N/A
5	Live	48.19	N/A	N/A	N/A	N/A	N/A
6	Live	68.1	N/A	N/A	N/A	N/A	N/A
7	Live	42.42	N/A	N/A	N/A	N/A	N/A
8	Live	39.43	N/A	N/A	N/A	N/A	N/A
Feature	Mean	St.Dev	Minimum	Maximum
Length	49.7	8.19	39.43	68.1
Time	N/A	N/A	N/A	N/A
Velocity	N/A	N/A	N/A	N/A
Item	Source	Length	ND.T	ND.Z	ND.M	Time	Velocity	Comment
1	Live	107.96	N/A	N/A	N/A	N/A	N/A	db 142
2	Live	65.17	N/A	N/A	N/A	N/A	N/A
3	Live	83.85	N/A	N/A	N/A	N/A	N/A
4	Live	127.38	N/A	N/A	N/A	N/A	N/A
5	Live	97.27	N/A	N/A	N/A	N/A	N/A
6	Live	134.05	N/A	N/A	N/A	N/A	N/A
7	Live	182.96	N/A	N/A	N/A	N/A	N/A
8	Live	84.42	N/A	N/A	N/A	N/A	N/A
Feature	Mean	St.Dev	Minimum	Maximum
Length	110.38	34.85	65.17	182.96
Time	N/A	N/A	N/A	N/A
Velocity	N/A	N/A	N/A	N/A
Item	Source	Length	ND.T	ND.Z	ND.M	Time	Velocity	Comment
1	Live	139.48	N/A	N/A	N/A	N/A	N/A	db 139
2	Live	65.71	N/A	N/A	N/A	N/A	N/A
3	Live	106.51	N/A	N/A	N/A	N/A	N/A
4	Live	55.56	N/A	N/A	N/A	N/A	N/A
5	Live	65.6	N/A	N/A	N/A	N/A	N/A
6	Live	76.05	N/A	N/A	N/A	N/A	N/A
7	Live	87.41	N/A	N/A	N/A	N/A	N/A
8	Live	48.18	N/A	N/A	N/A	N/A	N/A
Feature	Mean	St.Dev	Minimum	Maximum
Length	80.56	28.13	48.18	139.48
Time	N/A	N/A	N/A	N/A
Velocity	N/A	N/A	N/A	N/A
Item	Source	Length	ND.T	ND.Z	ND.M	Time	Velocity	Comment
1	Live	77.69	N/A	N/A	N/A	N/A	N/A	db 136
2	Live	68.48	N/A	N/A	N/A	N/A	N/A
3	Live	80.5	N/A	N/A	N/A	N/A	N/A
4	Live	84.18	N/A	N/A	N/A	N/A	N/A
5	Live	42.08	N/A	N/A	N/A	N/A	N/A
6	Live	43.32	N/A	N/A	N/A	N/A	N/A
7	Live	65.44	N/A	N/A	N/A	N/A	N/A
8	Live	47.58	N/A	N/A	N/A	N/A	N/A
Feature	Mean	St.Dev	Minimum	Maximum
Length	63.66	16.07	42.08	84.18
Time	N/A	N/A	N/A	N/A
Velocity	N/A	N/A	N/A	N/A
Item	Source	Length	ND.T	ND.Z	ND.M	Time	Velocity	Comment
1	Live	77.5	N/A	N/A	N/A	N/A	N/A	db 106
2	Live	37.84	N/A	N/A	N/A	N/A	N/A
3	Live	61.14	N/A	N/A	N/A	N/A	N/A
4	Live	45.57	N/A	N/A	N/A	N/A	N/A
5	Live	55.96	N/A	N/A	N/A	N/A	N/A
6	Live	60.03	N/A	N/A	N/A	N/A	N/A
7	Live	50.91	N/A	N/A	N/A	N/A	N/A
8	Live	74.11	N/A	N/A	N/A	N/A	N/A
Feature	Mean	St.Dev	Minimum	Maximum
Length	57.88	12.59	37.84	77.5
Time	N/A	N/A	N/A	N/A
Velocity	N/A	N/A	N/A	N/A
Item	Source	Length	ND.T	ND.Z	ND.M	Time	Velocity	Comment
1	Live	78.15	N/A	N/A	N/A	N/A	N/A	db 57
2	Live	59.85	N/A	N/A	N/A	N/A	N/A
3	Live	60.13	N/A	N/A	N/A	N/A	N/A
4	Live	54.42	N/A	N/A	N/A	N/A	N/A
5	Live	59.48	N/A	N/A	N/A	N/A	N/A
6	Live	50.18	N/A	N/A	N/A	N/A	N/A
7	Live	44.95	N/A	N/A	N/A	N/A	N/A
8	Live	34.99	N/A	N/A	N/A	N/A	N/A
Feature	Mean	St.Dev	Minimum	Maximum
Length	55.27	11.88	34.99	78.15
Time	N/A	N/A	N/A	N/A
Velocity	N/A	N/A	N/A	N/A
Item	Source	Length	ND.T	ND.Z	ND.M	Time	Velocity	Comment
1	Live	89.55	N/A	N/A	N/A	N/A	N/A	db 56
2	Live	75.18	N/A	N/A	N/A	N/A	N/A
3	Live	82.7	N/A	N/A	N/A	N/A	N/A
4	Live	92.89	N/A	N/A	N/A	N/A	N/A
5	Live	82.06	N/A	N/A	N/A	N/A	N/A
6	Live	99.09	N/A	N/A	N/A	N/A	N/A
7	Live	97.95	N/A	N/A	N/A	N/A	N/A
8	Live	84.65	N/A	N/A	N/A	N/A	N/A
Feature	Mean	St.Dev	Minimum	Maximum
Length	88.01	7.8	75.18	99.09
Time	N/A	N/A	N/A	N/A
Velocity	N/A	N/A	N/A	N/A
