# Supplementary material for: Cardiovascular manifestations of renovascular hypertension in diabetic mice
Source: PeerJ. 2016 Feb 22;4:e1736. doi: 10.7717/peerj.1736 (PMC4768709; doi:10.7717/peerj.1736)
Supplement: Figure S1 [file peerj-04-1736-s001.xlsx]

## Sheet: Sheet1
slide #	Days	Aorta Path Score	A-SMA	mean media width at 10x	% Heart Fibrosis quantitative	Heart weights	Body Weight
DBC RAS
E-Time(<2w)
dbc 160	3	0	0	48.05	2.4	150	19.8
dbc 159	3	0	0	62.49	2.83	150	21.3
dbc 158	3	0	0	43.37	13.63	180	20.8
dbc 157	3	0	0	43.51	2.21	130	18.3
dbc 156	3	0	0	42.7	1.52	130	21.3
dbc 140	3	0	0	41.62	2.16	150	17.4
dbc 139	3	0	0	58.31	1.74	140	18
dbc 138	3	0	1	54.98	2.56	120	16.3
dbc 137	3	0	0	51.83	2.23	130	19.6
dbc 136	3	0	0	55.49	1.87	130	19.2
dbc 155	6	0	2	75.3	1.24	80	11.5
dbc 154	7	1	1	90.46	6.88	150	21.2
dbc 153	7	1	1	86.88	4.34	120	18.5
dbc 152	7	1	0	75.88	7.77	130	20.6
dbc 151	7	3	1	80.96	2.31	120	18.6
dbc 146	7	0	0	81.53	15.88	130	17.6
dbc 150	8	0	0	77.21	2.97	150	20.6
dbc 147	8	3	2	101.73	7.39	130	19
L-Time (> 2w)
dbc-82	29	0		67.5	9.6	180	21.5
dbc-83	29	0		50.61	15.66	140	21.8
dbc-45	42	0	0	72.91	2.88	120	21.5
dbc44	42	0	0	67.22	2.98	130	20
dbc 43	42	1	2	90.33	2.31	140	24.2
dbc 42	42	1	2	64.71	1.33	140	24.4
dbc 41	42	0	2	58.85	5.62	160	24.4
dbc 46	42	0	1	62.67	0.39	140	23.2
dbc 47	42	1	1	70.37	2.37	150	21.6
dbc 48	42	0	1	60.68	2.9	130	22.3
dbc 49	42	1	1	61.07	0.8	140	21
dbc 50	42	2	1	89.55	2.23	130	22.9
dbc 119	116	0	0	66.01	6.39	150	26.5
dbc 118	116	0	1	73.35	1.79	170	25.4
dbc 117	116	0	1	61.65	2.2	160	26.3
dbc 124	119	0	1	59.98	4.27	160	26.4
dbc 123	119	0	0	50.92	2.18	160	25.1
dbc 122	119	0	0	75.95	5.81	160	26
dbc 121	119	0	0	83.22	4.91	130	26
DB RAS
E-Time(<2w)
db 105	5	1	2	83.84	11.85	160
db 102	5	3	3	104.58	4.12	120
db 140	6	0	2	53.83	6.07	140	30.8
db 139	6	3	3	80.56	2.98	150	31.4
db 138	6	0	0	52.71	3.64	140	28.9
db 137	6	0	0	45.64	5.97	140	32.8
db 136	6	3	3	63.66	2.42	110	31.3
db 145	7	2	0	47.82	1.15	150	33.7
db 144	7	3	3	49.7	4.99	140	28.3
db 143	7	0	1	55.01	9.23	160	32
db 142	7	3	3	110.38	6.81	140	33.7
db 160	14	0	0	39.51	1.74	140	36.3
db 158	14	3	3	109.18	15.26	150	32.9
db 157	14	1	2	88.35	4.15	130	26.6
db 155	14	3	3		6.93	140	37
db 154	14	0	2	63.29	1.44	120	38.6
db 153	14	3	3	38.98	8.93	150	30.2
db 152	14	2	2	60.37	3.64
db 151	14	3	3	104.75	11.09	150	30.8
db 156	14	3	3		0.86	130	36.5
L-Time (> 2w)
db 81	29	1		54.62	16.12	150	26.6
db 83	29	1		66.07	12.19	190	28.1
db 69	30	0		62.92	2.96	130	32.1
db 68	30	1		56.11	3.43	140	32.2
db 67	30	1		74.41	9.7	160	37.4
db 66	30	0		58.21	0.97	150	35.3
db 50	42	1	3	68.06	3.26	180	47
db 48	42	2	2	61.09	4.47	210	46.3
db 47	42	0	2	91.81	1.06	150	42.6
db 46	42	1	3	109.48	3.58	160	45.2
db 45	42	0	2	66.43	3.32	140	37.5
db 44	42	2	1	85.75	8.24	190	47.6
db 43	42	0	1	56.69	2.07	120	37.4
db 42	42	0	2	61.79	10.99	150	44.2
db 41	42	2	3	86.9	1.16	160	45
db 101	42	0	0	55.38	9.89	210	37.8
db 49	42	1	2	113.83	6.74	170	42.2
db 106	42	3	3	57.88	6.19	180	27.6
db 56	90	2	3	88.01	14.42	230	30.1
db 57	104	1	2	55.27	3.47	200	47.8
db 114	116	0	3	69	12.84	170	45.6
db 113	116	3	2	124.72	13.56	220	39.5
db 111	116	0	1	49.11	14.49	210	41.7
db 112	116	1	2	108.46	2.22	230	27.5
db 124	117	2	3	114.26	1.81	350	49.2
db 122	117	2	2	77.69	2.23	210	30.4
DBC Sham
E-Time(<2w)
dbc 165	3	0	0	44.16	0.44	130	20.3
dbc 164	3	0	0	47.23	1.31	120	21
dbc 163	3	0	0	37.28	0.81	140	20.9
dbc 162	3	0	0	37.8	1.59	100	20.5
dbc 161	3	0	0	47.51	1.4	130	20.6
dbc 145	8	0	0	55.26	0.85	140	21.1
dbc 144	8	0	1	65.22	1.3	120	20.4
dbc 143	8	0	0	55.4	1.61	120	22
dbc 142	8	0	0	47.03	1.64	120	22.7
dbc 141	8	0	0	48.83	0.85	130	21.2
L-Time (> 2w)
dbc 51	42	0	0	44.41	0.99	150	25
dbc 52	42	0	0	53.78	0.53	120	24.7
dbc 53	42	0	0		1.53	150	25.9
dbc 54	42	0	0	94.98	0.79	120	24.2
dbc 55	42	0	0	52.08	1.18	140	24.6
dbc 115	117	0	0	66.01	1.39	160	26.3
dbc 113	117	0	1	61.89	1.91	160	28
dbc 112	117	0	0	48.54	1.84	140	26.4
dbc 111	117	0	0	47.09	1.57	150	26.9
DB Sham
E-Time(<2w)
db 150	7	0	0	27.42	2.31	120	32.3
db 149	7	0	0	63.73	1.2	120	28
db 148	7	0	0	58.33	0.64	120	32.4
db 147	7	0	0	65.39	0.85	120	33.3
db 146	7	0	0	50.84	0.8	130	35.1
db 164	13	0	0	27.29	2.65	150	33.1
db 161	13	0	0	74.6	2.37	160	38.9
L-Time (> 2w)
db 55	42	0	0	108.79	0.99	110	31.4
db 54	42	0	2	51.74	3.39	120	36.9
db 53	42	0	1	66.41	2.14	120	39.9
db 52	42	0	0	74.42	0.99	130	43.5
db 51	42	0	0	73.01	0.97	110	34.7
db 109	42	0	1	35.6	0.66	120	36.3
db 108	42	0	0	53.41	0.65	130	29.8
db 107	42	0	0	35.49	0.4	110	30
db 165	42	0	0	67.55	2.94	180	41.5
db 117	116	0	1	61.89	2.2	170	27
db 116	116	0	0	62.92	1.59	150	24.4
db 115	116	0	0	52.37	0.8	120	26.4
db 120	117	0	0	47.7	1.32	140	30.5
db 119	117	0	0	50.76	2.75	130	26
